# Supplementary material for: Exploiting intracellular oncogenic proteins to release cytotoxins
Source: Royal Society of Chemistry journal article supplement (doi:10.1039/d5md00764j), 2026-01-01
Supplement: d5md00764j1.pdf [file d5md00764j1.pdf]

## Supporting Information

# Exploiting intracellular oncogenic proteins to release cytotoxins

Matthias Schild,<sup>1</sup> Dennis Gillingham<sup>1\*</sup>

1. Department of Chemistry, University of Basel, 4056 Basel, Switzerland

\* correspondence: [dennis.gillingham@unibas.ch](mailto:dennis.gillingham@unibas.ch)

# Contents

|                                                                         |           |
|-------------------------------------------------------------------------|-----------|
| <b>Contents</b>                                                         | <b>3</b>  |
| <b>1 Abbreviations and definitions</b>                                  | <b>4</b>  |
| <b>2 Synthesis</b>                                                      | <b>6</b>  |
| Synthesis Overview Afatinib-Tetrazine . . . . .                         | 7         |
| Synthesis Ara-Tz/Tetrazine (3) . . . . .                                | 8         |
| Synthesis Tetrazine Intermediate (5) . . . . .                          | 8         |
| Synthesis Afatinib-Tetrazine Intermediate (8) . . . . .                 | 9         |
| Synthesis Afatinib-Tetrazine Intermediate (9) . . . . .                 | 9         |
| Synthesis Afatinib-Tetrazine Intermediate (12) . . . . .                | 10        |
| Synthesis Afatinib-Tetrazine Intermediate (13) . . . . .                | 10        |
| Synthesis Afa-Tz/Afatinib-Tetrazine (14) . . . . .                      | 11        |
| Synthesis Doxorubicin-TCO (17) . . . . .                                | 11        |
| Synthesis MMAE-TCO (19) . . . . .                                       | 12        |
| Synthesis Cy5.5-nrTCO (22) . . . . .                                    | 12        |
| <b>3 Cell culture</b>                                                   | <b>13</b> |
| 3.1 Cell lines . . . . .                                                | 13        |
| 3.2 Typical seeding conditions . . . . .                                | 13        |
| <b>4 SDS-PAGE</b>                                                       | <b>14</b> |
| <b>5 In-gel fluorescence</b>                                            | <b>15</b> |
| <b>6 Western blotting</b>                                               | <b>16</b> |
| 6.1 Primary antibodies . . . . .                                        | 16        |
| 6.2 Secondary antibodies . . . . .                                      | 16        |
| <b>7 Cell viability</b>                                                 | <b>17</b> |
| 7.1 Resazurin assay (single treatment) . . . . .                        | 17        |
| 7.2 Resazurin assay (co-incubation) . . . . .                           | 17        |
| 7.3 Resazurin assay (pre-targeting) . . . . .                           | 17        |
| <b>8 Software</b>                                                       | <b>18</b> |
| <b>9 Supporting figures and tables</b>                                  | <b>19</b> |
| Fig. S2 – Cell viability data of single agents in A431 . . . . .        | 20        |
| Fig. S3 – Cell viability data in A431 using Ara-Tz . . . . .            | 21        |
| Fig. S4 – Complete cell viability data across four cell lines . . . . . | 22        |
| Fig. S5 – Full in-gel fluorescence gel image of Fig. 2D . . . . .       | 23        |
| Fig. S6 – Full in-gel fluorescence gel image of Fig. 2E . . . . .       | 24        |
| Fig. S7 – Full in-gel fluorescence gel image of Fig. 5B . . . . .       | 25        |
| Fig. S8 – Full membrane image of Fig. 5A . . . . .                      | 26        |
| Tab. S1 – Data for Fig. 3A(iii) . . . . .                               | 27        |
| Tab. S2 – Data for Fig. 3B(i) . . . . .                                 | 27        |
| Tab. S3 – Data for Fig. 3B(ii) . . . . .                                | 28        |
| Tab. S4 – Data for Fig. 4A(i) . . . . .                                 | 29        |
| Tab. S5 – Data for Fig. 4A(ii) . . . . .                                | 30        |
| Tab. S6 – Data for Fig. 4B and Fig. S3 . . . . .                        | 31        |
| Tab. S7 – Data for Fig. 5C, Fig. S2, and Fig. S4 . . . . .              | 32        |

|                                                                   |           |
|-------------------------------------------------------------------|-----------|
| <b>10 NMR Spectra</b>                                             | <b>37</b> |
| Fig. S9 – <sup>1</sup> H-NMR of compound 3 (Ara-Tz) . . . . .     | 38        |
| Fig. S10 – <sup>13</sup> C-NMR of compound 3 (Ara-Tz) . . . . .   | 39        |
| Fig. S11 – <sup>1</sup> H-NMR of compound 5 . . . . .             | 40        |
| Fig. S12 – <sup>13</sup> C-NMR of compound 5 . . . . .            | 41        |
| Fig. S13 – <sup>1</sup> H-NMR of compound 8 . . . . .             | 42        |
| Fig. S14 – <sup>13</sup> C-NMR of compound 8 . . . . .            | 43        |
| Fig. S15 – <sup>1</sup> H-NMR of compound 9 . . . . .             | 44        |
| Fig. S16 – <sup>13</sup> C-NMR of compound 9 . . . . .            | 45        |
| Fig. S17 – <sup>1</sup> H-NMR of compound 12 . . . . .            | 46        |
| Fig. S18 – <sup>13</sup> C-NMR of compound 12 . . . . .           | 47        |
| Fig. S19 – <sup>1</sup> H-NMR of compound 13 . . . . .            | 48        |
| Fig. S20 – <sup>1</sup> H-NMR of compound 14 (Afa-Tz) . . . . .   | 49        |
| Fig. S21 – <sup>13</sup> C-NMR of compound 14 (Afa-Tz) . . . . .  | 50        |
| Fig. S22 – <sup>1</sup> H-NMR of compound 17 (Dox-TCO) . . . . .  | 51        |
| Fig. S23 – <sup>1</sup> H-NMR of compound 19 (MMAE-TCO) . . . . . | 52        |
| <b>11 High Resolution Mass Spectra</b>                            | <b>53</b> |
| Fig. S24 – HRMS of compound 3 (Ara-Tz) . . . . .                  | 54        |
| Fig. S25 – HRMS of compound 5 . . . . .                           | 55        |
| Fig. S26 – HRMS of compound 8 . . . . .                           | 56        |
| Fig. S27 – HRMS of compound 9 . . . . .                           | 57        |
| Fig. S28 – HRMS of compound 12 . . . . .                          | 58        |
| Fig. S29 – HRMS of compound 13 . . . . .                          | 59        |
| Fig. S30 – HRMS of compound 14 (Afa-Tz) . . . . .                 | 60        |
| Fig. S31 – HRMS of compound 17 (Dox-TCO) . . . . .                | 61        |
| Fig. S32 – HRMS of compound 19 (MMAE-TCO) . . . . .               | 62        |
| Fig. S33 – HRMS of compound 22 (Cy5.5-nrTCO) . . . . .            | 63        |
| <b>Bibliography</b>                                               | <b>64</b> |

# 1 Abbreviations and definitions

|                  |                                                                                                                            |
|------------------|----------------------------------------------------------------------------------------------------------------------------|
| ACN              | Acetonitrile (CAS: 75-05-8)                                                                                                |
| ADC              | Antibody-drug conjugate                                                                                                    |
| Afa-Tz           | Afatinib-tetrazine                                                                                                         |
| Afa              | Afatinib (CAS: 850140-72-6)                                                                                                |
| APS              | Ammonium persulfate (CAS: 7727-54-0)                                                                                       |
| Ara-Tz           | Aryl-alkyl-tetrazine (CAS: 1345955-28-3)                                                                                   |
| Boc              | <i>tert</i> -Butyloxycarbonyl                                                                                              |
| Cy5.5-nrTCO      | Cy5.5-non-releasing <i>trans</i> -cyclooctene conjugate                                                                    |
| Cy5.5            | Cyanine 5.5 (fluorescent dye, CAS: 2097714-45-7, amine derivative)                                                         |
| DCM              | Dichloromethane (CAS: 75-09-2)                                                                                             |
| DIPEA            | <i>N,N</i> -Diisopropylethylamine (CAS: 7087-68-5)                                                                         |
| DMAP             | 4-Dimethylaminopyridine (CAS: 1122-58-3)                                                                                   |
| DMEM             | Dulbecco's modified Eagle's medium                                                                                         |
| DMF              | <i>N,N</i> -Dimethylformamide (CAS: 68-12-2)                                                                               |
| DMSO             | Dimethyl sulfoxide (CAS: 67-68-5)                                                                                          |
| Dox-TCO          | Doxorubicin- <i>trans</i> -cyclooctene conjugate                                                                           |
| Dox              | Doxorubicin (CAS: 23214-92-8)                                                                                              |
| DTT              | Dithiothreitol (CAS: 3483-12-3)                                                                                            |
| EDTA             | Ethylenediaminetetraacetic acid (CAS: 60-00-4)                                                                             |
| EGFR             | Epidermal growth factor receptor, P00533                                                                                   |
| EISA             | Enzyme-instructed supramolecular self-assembly                                                                             |
| ERBB             | Erythroblastic oncogene B, receptor family of four receptor tyrosine kinases, comprising EGFR (HER1), HER2, HER3, and HER4 |
| ESI-MS           | Electrospray ionization-mass spectrometry                                                                                  |
| ESI              | Electronic Supplementary Information                                                                                       |
| EtOAc            | Ethyl acetate (CAS: 141-78-6)                                                                                              |
| FCS              | Fetal calf serum                                                                                                           |
| FDA              | Food and Drug Administration (United States)                                                                               |
| HATU             | Hexafluorophosphate azabenzotriazole tetramethyl uronium (CAS: 148893-10-1)                                                |
| HCl              | Hydrochloric acid (CAS: 7647-01-0)                                                                                         |
| HER2             | Human epidermal growth factor receptor 2, receptor tyrosine-protein kinase erbB-2 (ERBB2), P04626                          |
| HER3             | Human epidermal growth factor receptor 3, receptor tyrosine-protein kinase erbB-3 (ERBB3), P21860                          |
| HER4             | Human epidermal growth factor receptor 4, receptor tyrosine-protein kinase erbB-4 (ERBB4), Q15303                          |
| HOBt             | Hydroxybenzotriazole (CAS: 123333-53-9)                                                                                    |
| HPLC             | High-performance liquid chromatography                                                                                     |
| HRMS             | High-resolution mass spectrometry                                                                                          |
| IC <sub>50</sub> | Half maximal inhibitory concentration                                                                                      |
| IEDDA            | Inverse-electron-demand Diels-Alder                                                                                        |
| KRAS             | Kirsten rat sarcoma viral oncogene homolog, P01116                                                                         |
| krcf             | Kilo relative centrifugal force (1000 × rcf)                                                                               |
| LCMS             | Liquid chromatography-mass spectrometry                                                                                    |
| MeOH             | Methanol (CAS: 67-56-1)                                                                                                    |
| milliQ           | Ultrapure water (≥18 MΩ cm) (CAS: 7732-18-5)                                                                               |
| MMAE-TCO         | Monomethyl auristatin E- <i>trans</i> -cyclooctene conjugate                                                               |
| MMAE             | Monomethyl auristatin E (CAS: 474645-27-7)                                                                                 |

|          |                                                                |
|----------|----------------------------------------------------------------|
| (m/v)    | Mass per volume                                                |
| MS       | Mass spectrometry                                              |
| NMR      | Nuclear magnetic resonance                                     |
| nrTCO    | Non-releasing <i>trans</i> -cyclooctene                        |
| p-NPE    | <i>para</i> -Nitrophenyl ester                                 |
| PAGE     | Polyacrylamide gel electrophoresis                             |
| PBS      | Phosphate buffered saline                                      |
| PET      | Positron emission tomography                                   |
| ppm      | Parts per million                                              |
| PROTAC   | Proteolysis targeting chimera                                  |
| Q-TOF    | Quadrupole time-of-flight                                      |
| rcf      | Relative centrifugal force ( $\times g$ )                      |
| RIPA     | Radioimmunoprecipitation assay buffer                          |
| RT       | Room temperature                                               |
| SDS      | Sodium dodecyl sulfate (CAS: 151-21-3)                         |
| SDS-PAGE | Sodium dodecyl sulfate-polyacrylamide gel electrophoresis      |
| SEM      | Standard error of the mean                                     |
| TBST     | Tris-buffered saline with Tween 20                             |
| TCO      | <i>trans</i> -Cyclooctene                                      |
| TEMED    | <i>N,N,N',N'</i> -Tetramethylethylenediamine (CAS: 110-18-9)   |
| TFA      | Trifluoroacetic acid (CAS: 76-05-1)                            |
| THF      | Tetrahydrofuran (CAS: 109-99-9)                                |
| TLC      | Thin-layer chromatography                                      |
| TMS      | Tetramethylsilane (CAS: 993-07-7)                              |
| TPS      | Total protein stain                                            |
| Tz       | Tetrazine                                                      |
| UFLC     | Ultra-fast liquid chromatography                               |
| UHPLC-MS | Ultra-high performance liquid chromatography-mass spectrometry |
| UV       | Ultraviolet                                                    |
| (v/v)    | Volume per volume                                              |

## 2 Synthesis

**General** All solvents and reagents were purchased from commercial suppliers and used without further purification unless noted otherwise. Dry solvents were purchased from Thermo Fisher and Sigma-Aldrich as their respective *AcroSeal* or *Sure/Seal* brands. Reactions were generally conducted under nitrogen atmosphere with stirring or shaking unless noted otherwise. Work-up procedures were performed under ambient atmosphere. *trans*-Cyclooctenes were bought as activated esters from Sirius Fine Chemicals SiChem GmbH (Bremen, Germany): TCO\*A - active ester (p-NPE) (SC-8007, CAS: 1580501-97-8) and non-release (E)-cyclooct-4-en active ester / TCO4 / A- active ester (p-NPE) / axial (SC-8019, CAS: 1438415-89-4). Reactions were monitored using UHPLC-MS (see below) or TLC (TLC Silica gel 60 F<sub>254</sub> aluminum sheets, Sigma-Aldrich/Merck) either detected under UV at 254 nm or by KMnO<sub>4</sub> stain. Yields were not optimized. Systematic names were generated using ChemDraw (version 23.1.1). Stock solutions of compounds were made in biograde DMSO (D8418, Sigma-Aldrich) by serial dilution.

**UHPLC-MS** Reaction control was performed on an Agilent 1290 Infinity ultrahigh performance liquid chromatography (UHPLC) system coupled to an Agilent 6130 Quadrupole ESI-MS. Mass spectra were generally recorded in positive ion mode with the notable exception of doxorubicin-TCO, which could only be detected in negative ion mode. Column used was an Agilent ZORBAX RRHD Eclipse Plus C18 2.1 mm – 50 mm, 1.8 µm, 95 Å, running an Agilent ZORBAX RRHD Eclipse Plus C18 2.1 mm – 5 mm, 1.8 µm, 300 Å guard column in front. Standard gradient was 3 % to 95 % B over 2.3 min, 95 % B for 0.45 min at 0.8 ml min<sup>-1</sup>. Solvent A was ultrapure water with 1 % ACN and 0.1 % formic acid. Solvent B was ACN with 1 % ultrapure water and 0.1 % formic acid.

**Preparative HPLC** Preparative HPLC was performed on a Shimadzu UFLC system using a Phenomenex (Aschaffenburg, Germany) Gemini 5 µm NX-C18 110 Å, 250 mm × 21.5 mm column. The following gradient was used for all purifications: 5 min 100 % A, gradient over 25 min to 100 % solvent B, 5 min 100 % B at 20 ml min<sup>-1</sup>. Solvent A was ultrapure water with 0.1 % v/v TFA, solvent B HPLC-grade ACN with 0.1 % v/v TFA.

**Column chromatography** For normal phase flash column chromatography SiliaFlash P60 40 µm – 63 µm/230-400 mesh (SiliCycle, Quebec, Canada) was used, for reverse phase separations LiChroprep RP-18 40 µm – 63 µm (Merck). Reverse phase columns were reused until performance degradation could be observed. Chromatography was performed on an Isolera Four (Biotage) or a CombiFlash Rf+ (Teledyne ISCO). Normal phase separations were conducted using gradients of hexane-EtOAc or DCM-MeOH, reverse phase chromatography using ultrapure water with 0.1 % v/v TFA and HPLC-grade ACN with 0.1 % v/v TFA.

**NMR** NMR spectra were recorded on a Bruker Avance III at 500 MHz (<sup>1</sup>H) and 126 MHz (<sup>13</sup>C) at ambient temperature unless noted otherwise. NMR solvents were bought from Apollo Scientific or Eurisotop. Chemical shifts are reported in ppm relative to residual solvent signals relative to TMS or to TMS directly where possible. Coupling constants are given in hertz (Hz). Abbreviations used: s = singlet, d = doublet, t = triplet, q = quartet, p = pentet, m = multiplet, br = broad.

**HRMS** High resolution mass spectrometry of small molecules was performed on a Bruker maXis 4G ESI-Q-TOF with direct injection using methanol with 0.1 % formic acid. Compounds were prepared in ACN:water 1:1 at approximately 10 µM. Analysis was performed by Michael Pfeffer of the analytics team at University of Basel.

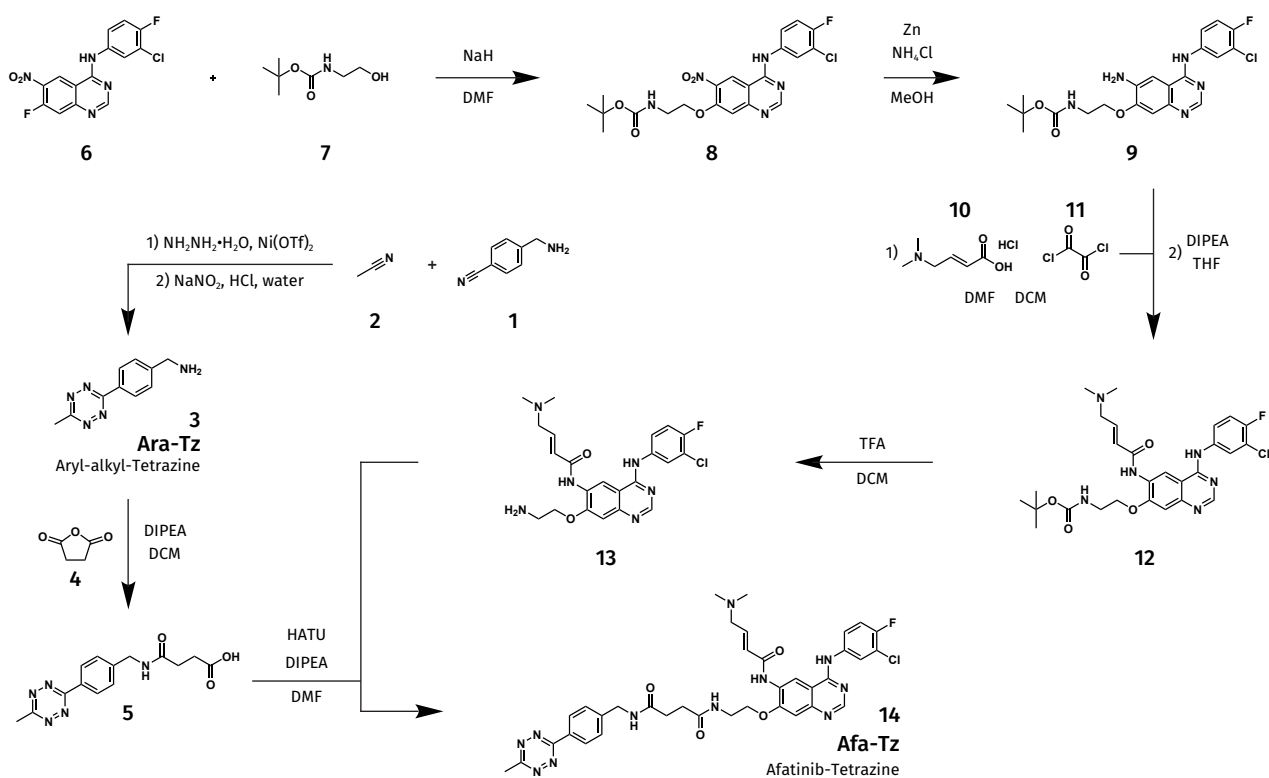

Figure S1: Synthesis overview of Afa-Tz (afatinib-tetrazine) and Ara-Tz (aryl-alkyl-tetrazine).

**Ara-Tz/Aryl-alkyl-Tetrazine (3)**  
(4-(6-methyl-1,2,4,5-tetrazin-3-yl)phenyl)methanamine

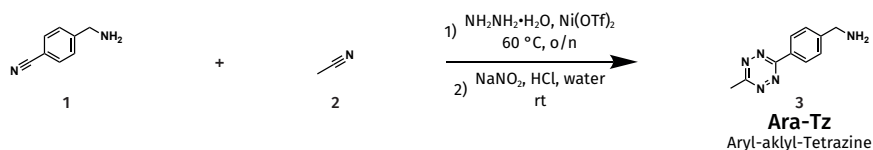

Metal-catalyzed tetrazine synthesis was performed following a modified procedure by Yang et al.<sup>1</sup> and Fan et al.<sup>2</sup>. Under a nitrogen atmosphere, nitrile **1** (1 g, 7.6 mmol) and Ni(OTf)<sub>2</sub> (1.35 g, 3.8 mmol) were dissolved in ACN (2, 4 ml, 76 mmol) and the reaction was put into an ice bath. Hydrazine hydrate (20 ml, 248 mmol) was slowly added and the reaction was stirred for another hour at 0 °C. The reaction was then heated to 60 °C and stirred overnight. The reaction was allowed to cool down. NaNO<sub>2</sub> (12 g dissolved in 50 ml water) was added and the reaction was acidified with 1 M HCl until no further color change and fume development could be observed. The reaction was extracted with DCM and the combined organic layers were washed with brine and dried over Na<sub>2</sub>SO<sub>4</sub>. Solvents were removed under reduced pressure. The crude reaction product was purified using normal phase column chromatography to give the title compound in 41 % yield (619 mg) as a red solid.

<sup>1</sup>H-NMR (500 MHz, MeOD): δ 8.63 (d, *J* = 8.4 Hz, 2H), 7.72 (d, *J* = 8.8 Hz, 2H), 4.26 (s, 2H), 3.06 (s, 3H). <sup>13</sup>C-NMR (126 MHz, MeOD): δ 167.7, 163.5, 137.4, 132.9, 129.4 (2 C), 128.1 (2 C), 42.5, 19.7. HRMS: [M+H]<sup>+</sup>/C<sub>10</sub>H<sub>12</sub>N<sub>5</sub><sup>+</sup> calculated 202.1088 *m/z*, found 202.1085 *m/z*.

**(5)**  
4-((4-(6-methyl-1,2,4,5-tetrazin-3-yl)benzyl)amino)-4-oxobutanoic acid

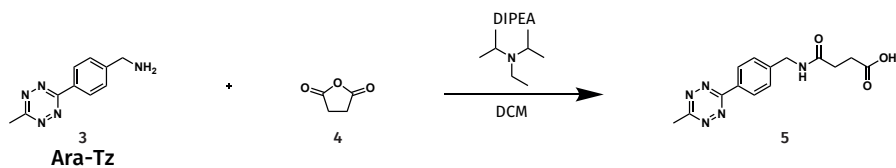

Ara-Tz (**3**, 50 mg, 0.248 mmol) was dissolved in DCM. Succinic anhydride (**4**, 124 mg, 1.24 mmol) and DIPEA (346 μl, 2.48 mmol) were added and the reaction was stirred at room temperature overnight. Solvents were removed under reduced pressure and the crude reaction product was purified by preparative HPLC to yield title compound **5** as a red solid in 31 % yield (23 mg).

<sup>1</sup>H-NMR (500 MHz, DMSO): δ 12.09 (s, br, 1H), 8.51 (t, *J* = 6.0 Hz, 1H), 8.40 (d, *J* = 8.4 Hz, 2H), 7.53 (d, *J* = 8.6 Hz, 2H), 4.40 (d, *J* = 6.0 Hz, 2H), 2.99 (s, 3H), 2.50 – 2.46 (m, 2H), 2.46 – 2.41 (m, 2H). <sup>13</sup>C-NMR (126 MHz, DMSO): δ 174.3, 171.7, 167.5, 163.7, 145.0, 130.8, 128.4 (2 C), 127.8 (2 C), 42.3, 30.5, 29.6, 21.3. HRMS: [M+H]<sup>+</sup>/C<sub>14</sub>H<sub>16</sub>N<sub>5</sub>O<sub>3</sub><sup>+</sup> calculated 302.1248 *m/z*, found 302.1251 *m/z*.



(8)

*tert*-butyl (2-((4-((3-chloro-4-fluorophenyl)amino)-6-nitroquinazolin-7-yl)oxy)ethyl)carbamate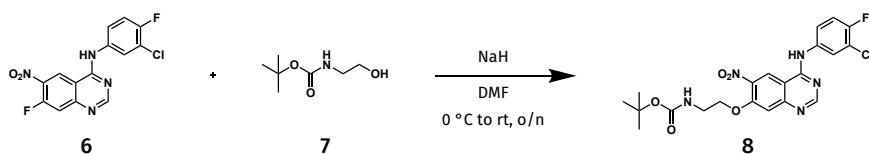

Sodium hydride (60 % suspension in mineral oil, 689 mg, 17.2 mmol) was suspended in DMF on ice. *tert*-butyl (2-hydroxyethyl)carbamate (**7**, 2.87 g, 17.8 mmol, dissolved in DMF) was added dropwise. The reaction was stirred for 30 min at 0 °C. Afatinib core **6** (2 g, 5.94 mmol) was added. The deep red solution was stirred overnight allowing it to slowly reach room temperature. The reaction was quenched with 1 M HCl and extracted with DCM. Solvents were removed under reduced pressure and the crude reaction product was purified by reverse phase column chromatography to give title compound **8** as a strongly yellow powder in 95 % yield (2.7 g).

<sup>1</sup>H-NMR (500 MHz, DMSO):  $\delta$  12.28 (s, 1 H), 9.85 (s, 1 H), 8.95 (s, 1 H), 8.06 (dd,  $J$  = 6.8, 2.6 Hz, 1 H), 7.79 (ddd,  $J$  = 9.0, 4.3, 2.6 Hz, 1 H), 7.75 (s, 1 H), 7.52 (t,  $J$  = 9.0 Hz, 1 H), 7.04 (t,  $J$  = 5.7 Hz, 1 H), 4.30 (t,  $J$  = 5.5 Hz, 2 H), 3.40 (q,  $J$  = 5.4 Hz, 2 H), 1.37 (s, 9 H). <sup>13</sup>C-NMR (126 MHz, DMSO):  $\delta$  159.4, 155.7, 155.2, 155.2 (d,  $J(\text{FC})$  = 246.7 Hz), 153.3, 143.7, 139.7, 133.9 (d,  $J(\text{FC})$  = 3.3 Hz), 126.3, 125.1 (d,  $J(\text{FC})$  = 7.4 Hz), 123.6, 119.2 (d,  $J(\text{FC})$  = 18.7 Hz), 116.9 (d,  $J(\text{FC})$  = 22.0 Hz), 106.7, 103.8, 78.0, 69.1, 38.7, 28.2 (3 C). HRMS:  $[\text{M}+\text{H}]^+/\text{C}_{21}\text{H}_{22}\text{ClFN}_5\text{O}_5^+$  calculated 478.1288  $m/z$ , found 478.1295  $m/z$ .

(9)

*tert*-butyl (2-((6-amino-4-((3-chloro-4-fluorophenyl)amino)quinazolin-7-yl)oxy)ethyl)carbamate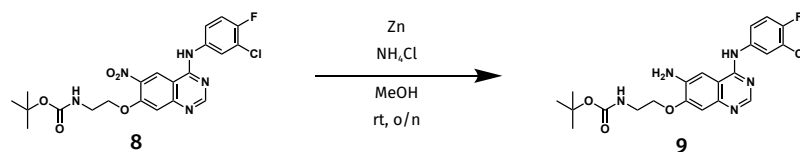

Afatinib-tetrazine precursor **8** (148 mg, 0.31 mmol), zinc powder (101 mg, 1.55 mmol), and ammonium chloride (99 mg, 1.86 mmol) were suspended in 10 ml methanol. The reaction was stirred overnight under a nitrogen atmosphere at room temperature. Solids were removed by filtration through a pad of celite on a glass filter. Solvents were removed under reduced pressure to yield title compound **9** in 96 % yield (133 mg) as a yellow powder.

<sup>1</sup>H-NMR (500 MHz, DMSO):  $\delta$  10.8 (s, 1 H), 8.7 (s, 1 H), 8.0 (dd,  $J$  = 6.8, 2.6 Hz, 1 H), 7.7 (ddd,  $J$  = 9.0, 4.4, 2.6 Hz, 1 H), 7.6 (s, 1 H), 7.5 (t,  $J$  = 9.1 Hz, 1 H), 7.3 (m, 1 H), 7.2 (s, 1 H), 4.1 (t,  $J$  = 5.0 Hz, 2 H), 3.5 (q,  $J$  = 5.4 Hz, 2 H), 1.4 (s, 9 H). <sup>13</sup>C-NMR (126 MHz, DMSO):  $\delta$  157.0, 155.7, 154.8 (d,  $J(\text{FC})$  = 254.6 Hz), 153.5, 146.3, 140.8, 134.8 (d,  $J(\text{FC})$  = 3.3 Hz), 132.9, 126.0, 124.7 (d,  $J(\text{FC})$  = 7.3 Hz), 119.2 (d,  $J(\text{FC})$  = 18.6 Hz), 116.8 (d,  $J(\text{FC})$  = 21.9 Hz), 108.9, 100.8, 99.1, 78.0, 68.7, 39.1, 28.3 (3 C). HRMS:  $[\text{M}+\text{H}]^+/\text{C}_{21}\text{H}_{24}\text{ClFN}_5\text{O}_3^+$  calculated 448.1547  $m/z$ , found 448.1556  $m/z$ .

## (12)

*tert*-butyl (*E*)-2-((4-((3-chloro-4-fluorophenyl)amino)-6-(4-(dimethylamino)but-2-enamido)quinazolin-7-yl)oxy)ethyl)carbamate

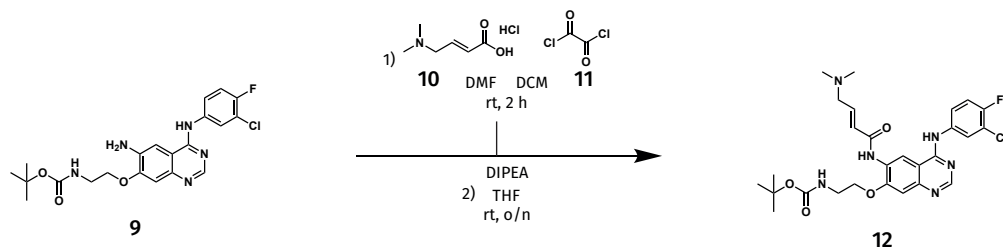

(*E*)-4-(dimethylamino)but-2-enoic acid hydrochloride (**10**, 41 mg, 0.25 mmol) was dissolved in 1 ml DCM and a few drops of DMF were added. Oxalyl chloride (**11**, 140  $\mu$ l of a 2 M solution in DCM, 0.28 mmol) was added dropwise and the reaction was stirred for 2 h at room temperature under nitrogen. Solvents were removed under reduced pressure. Afatinib-tetrazine precursor **9** (60 mg, 0.13 mmol) was dissolved in 2 ml THF and DIPEA (210  $\mu$ l, 1.2 mmol) was added. The THF solution was added to the previously prepared acyl chloride and the reaction was stirred at room temperature overnight. Solvents were removed under reduced pressure and the crude reaction product was directly purified by reverse phase column chromatography. Title compound **12** was obtained as a yellowish powder in 39 % yield (29 mg).

$^1\text{H-NMR}$  (500 MHz, DMSO):  $\delta$  10.81 (s, br, 1 H), 10.21 (s, br, 1 H), 9.78 (s, 1 H), 9.19 (s, 1 H), 8.76 (s, 1 H), 8.01 (dd,  $J$  = 6.8, 2.6 Hz, 1 H), 7.70 (ddd,  $J$  = 9.0, 4.3, 2.7 Hz, 1 H), 7.50 (t,  $J$  = 9.1 Hz, 1 H), 7.36 (s, 1 H), 7.26 (t,  $J$  = 6.1 Hz, 1 H), 6.91 – 6.81 (m, 1 H), 6.83 – 6.75 (m, 1 H), 4.24 (t,  $J$  = 5.2 Hz, 2 H), 4.00 (d,  $J$  = 6.8 Hz, 2 H), 3.49 (q,  $J$  = 5.4 Hz, 2 H), 2.82 (s, 6 H), 1.40 (s, 9 H).  $^{13}\text{C-NMR}$  (126 MHz, DMSO):  $\delta$  162.2, 158.3, 158.1, 156.1, 154.7, 154.4 (d,  $J(\text{FC})$  = 250 Hz, estimated from HMBC), 151.6, 135.2, 133.1, 131.3, 128.1, 125.6, 124.4, 119.0 (d,  $J(\text{FC})$  = 18.4 Hz), 116.7 (d,  $J(\text{FC})$  = 22.0 Hz), 114.6, 107.9, 78.2, 69.5, 56.8, 42.1 (2 C), 39.0, 28.2 (3 C), HRMS:  $[\text{M}+\text{H}]^+/\text{C}_{27}\text{H}_{33}\text{ClFN}_6\text{O}_4^+$  calculated 559.2231  $m/z$ , found 559.2233  $m/z$ .

## (13)

(*E*)-*N*-(7-(2-aminoethoxy)-4-((3-chloro-4-fluorophenyl)amino)quinazolin-6-yl)-4-(dimethylamino)but-2-enamide

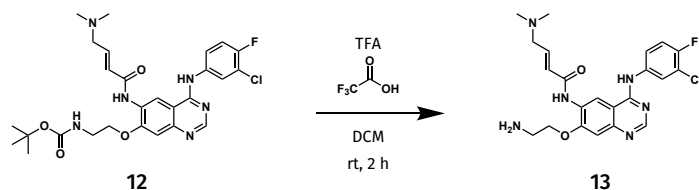

Afatinib-tetrazine precursor **12** (10 mg, 18  $\mu$ mol) was dissolved in 0.5 ml DCM. 0.5 ml TFA was added and the reaction was stirred for one hour at room temperature until LCMS showed complete deprotection. Solvents were removed under reduced pressure. The reaction product **13** was used without further purification.

$^1\text{H-NMR}$  (500 MHz, DMSO):  $\delta$  10.73 (s, 1 H), 10.44 (s, 1 H), 9.93 (s, 1 H), 9.19 (s, 1 H), 8.76 (s, 1 H), 8.33 (t,  $J$  = 5.7 Hz, 3 H), 8.04 (dd,  $J$  = 6.8, 2.6 Hz, 1 H), 7.73 (ddd,  $J$  = 9.0, 4.3, 2.6 Hz, 1 H), 7.54 – 7.45 (m, 2 H), 6.86 (d,  $J$  = 3.5 Hz, 2 H), 4.46 (t,  $J$  = 4.5 Hz, 2 H), 4.01 – 3.97 (m, 2 H), 3.46 – 3.39 (m, 2 H), 2.82 (s, 6 H). HRMS:  $[\text{M}+\text{H}]^+/\text{C}_{22}\text{H}_{25}\text{ClFN}_6\text{O}_2^+$  calculated 459.1707  $m/z$ , found 459.1702  $m/z$ .

### Afa-Tz/Afatinib-Tetrazine (14)

(*E*)-*N*1-(2-((4-(3-chloro-4-fluorophenyl)amino)-6-(4-(dimethylamino)but-2-enamido)quinazolin-7-yl)oxy)ethyl)-*N*4-(4-(6-methyl-1,2,4,5-tetrazin-3-yl)benzyl)succinamide

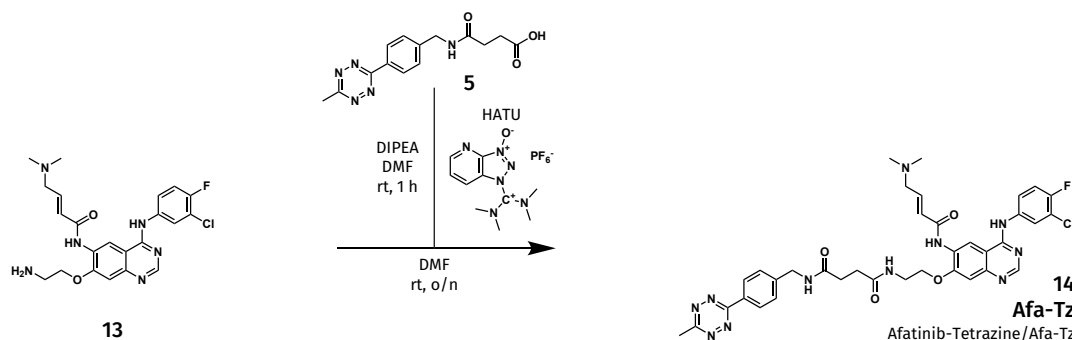

Tetrazine 5 (4 mg, 13  $\mu$ mol) was dissolved in 500  $\mu$ l DMF. HATU (10.1 mg, 26  $\mu$ mol) and DIPEA (11  $\mu$ l, 60  $\mu$ mol) were added and the reaction was stirred at room temperature for one hour. Afatinib derivative 13 (5.5 mg, 12  $\mu$ mol) was dissolved separately in 500  $\mu$ l DMF and added to the activated acid. The reaction was stirred overnight at room temperature. Solvents were removed under reduced pressure and the crude reaction product was redissolved in DMSO and purified by preparative HPLC. After lyophilization a red powder was obtained in 45 % yield (Afa-Tz/afatinib-tetrazine, 14, 4 mg).

$^1\text{H-NMR}$  (500 MHz, DMSO):  $\delta$  11.02 (s, br, 1 H), 10.86 (s, br, 1 H), 9.87 (s, 1 H), 9.18 (s, 1 H), 8.78 (s, 1 H), 8.57 (t,  $J$  = 6.0 Hz, 1 H), 8.52 (t,  $J$  = 5.9 Hz, 1 H), 8.35 (d,  $J$  = 8.2 Hz, 2 H), 7.98 (dd,  $J$  = 6.8, 2.6 Hz, 1 H), 7.69 (ddd,  $J$  = 9.0, 4.2, 2.5 Hz, 1 H), 7.52 (t,  $J$  = 9.0 Hz, 1 H), 7.47 (d,  $J$  = 8.1 Hz, 2 H), 7.35 (s, 1 H), 7.03 – 6.97 (m, 1 H), 6.97 – 6.88 (m, 1 H), 4.35 (d,  $J$  = 5.9 Hz, 2 H), 4.24 (t,  $J$  = 5.2 Hz, 2 H), 3.98 (d,  $J$  = 6.7 Hz, 2 H), 3.62 (q,  $J$  = 5.4 Hz, 2 H), 2.97 (s, 3 H), 2.78 (s, 6 H), 2.52 – 2.46 (m, 4 H).  $^{13}\text{C-NMR}$  (126 MHz, DMSO):  $\delta$  172.5, 171.6, 167.0, 163.1, 162.6, 158.3, 155.2, 154.8 (d,  $J(\text{FC})$  = 250 Hz, estimated from HMBC), 150.3, 144.4, 134.8, 133.0, 131.4, 130.2, 128.6, 127.8 (2 C), 127.3 (2 C), 126.1, 124.8, 119.0 (d,  $J(\text{FC})$  = 18.2 Hz), 116.8 (d,  $J(\text{FC})$  = 21.8 Hz), 115.0, 107.5, 101.3, 69.2, 56.8, 41.9 (2 C), 41.8, 37.7, 30.9, 30.7, 20.8. HRMS:  $[\text{M}+\text{H}]^+/\text{C}_{36}\text{H}_{38}\text{ClFN}_{11}\text{O}_4^+$  calculated 742.2775  $m/z$ , found 742.2778  $m/z$ .

### Doxorubicin-TCO (17)

(*E*)-cyclooct-2-en-1-yl ((2*S*,3*S*,4*S*)-3-hydroxy-2-methyl-6-(((1*S*,3*S*)-3,5,12-trihydroxy-3-(2-hydroxyacetyl)-10-methoxy-6,11-dioxo-1,2,3,4,6,11-hexahydrotetracen-1-yl)oxy)-tetrahydro-2H-pyran-4-yl)carbamate

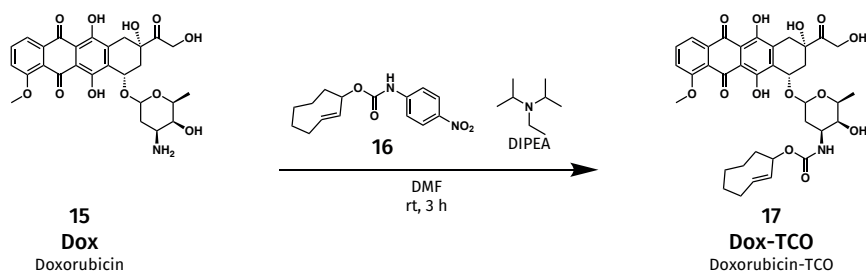

Doxorubicin (15, 40 mg, 69  $\mu$ mol) and activated *trans*-cyclooctene 16 (18 mg, 62  $\mu$ mol) were combined and dissolved in 3 ml DMF. While stirring at room temperature, 120  $\mu$ l DIPEA (690  $\mu$ mol) was added. After 3 h solvents were removed under reduced pressure. Reaction products were redissolved in DMSO and purified by preparative HPLC. After lyophilization Dox-TCO/Doxorubicin-TCO (17) was obtained as a red powder (30 mg, 69 %). Synthesis was performed following previously described procedures.<sup>3</sup>

$^1\text{H-NMR}$  (500 MHz,  $\text{CDCl}_3$ ):  $\delta$  13.97 (s, 1 H), 13.23 (s, 1 H), 8.03 (dt,  $J$  = 7.7, 1.0 Hz, 1 H), 7.82 – 7.75 (m, 1 H), 7.39 (dd,  $J$  = 8.6, 3.3 Hz, 1 H), 5.83 – 5.69 (m, 1 H), 5.56 – 5.42 (m, 2 H), 5.29 (s, 1 H), 5.24 (s, 1 H), 5.09 (s, 1 H), 4.80 – 4.71 (m, 2 H), 4.52 (s, 1 H), 4.18 – 4.10 (m, 1 H), 4.10 – 4.02 (m, 3 H), 3.90 – 3.82 (m, 1 H), 3.69 (s, 1 H), 3.27 (d,  $J$  = 18.8 Hz, 1 H), 3.04 – 2.98 (m, 2 H), 2.47 – 2.40 (m, 1 H), 2.33 (dt,  $J$  = 14.6, 2.2 Hz, 1 H), 2.20 – 2.14 (m, 1 H), 2.05 – 1.75 (m, 6 H), 1.61 (s, 2 H), 1.47 (s, 1 H), 1.30 (d,  $J$  = 6.5 Hz, 3 H), 1.08 – 0.98 (m, 1 H), 0.84 – 0.70 (m, 1 H). HRMS:  $[\text{M}-\text{H}]^-/\text{C}_{36}\text{H}_{40}\text{NO}_{13}$  calculated 694.2505  $m/z$ , found 694.2513  $m/z$ .

### MMAE-TCO (19)

(*E*)-cyclooct-2-en-1-yl ((*S*)-1-(((*S*)-1-(((3*R*,4*S*,5*S*)-1-((*S*)-2-((1*R*,2*R*)-3-(((1*S*,2*R*)-1-hydroxy-1-phenylpropan-2-yl)amino)-1-methoxy-2-methyl-3-oxopropyl)pyrrolidin-1-yl)-3-methoxy-5-methyl-1-oxoheptan-4-yl)(methyl)amino)-3-methyl-1-oxobutan-2-yl)amino)-3-methyl-1-oxobutan-2-yl)(methyl)carbamate

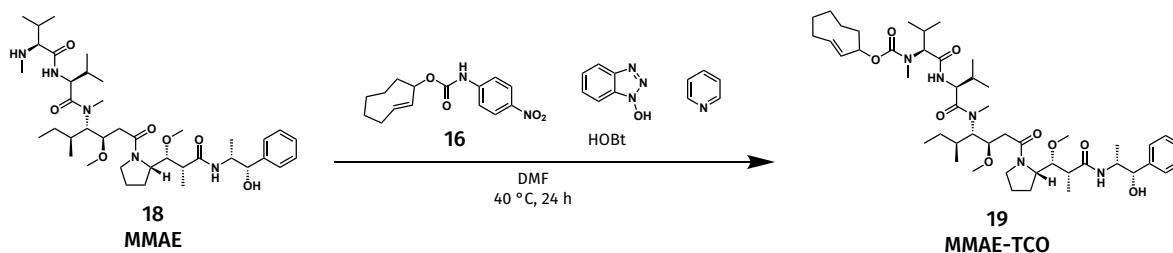

MMAE (**18**, 32 mg, 45  $\mu$ mol), activated *trans*-cyclooctene **16** (15 mg, 51  $\mu$ mol) and HOBt (12 mg, 76  $\mu$ mol) were combined in a 2 ml glass vial. 200  $\mu$ l DMF and 800  $\mu$ l pyridine were added and the solution was stirred for 24 h at 40 °C. Solvents were removed under reduced pressure. The resulting oil was dissolved in DMSO and purified by preparative HPLC. After lyophilization MMAE-TCO (**19**) was obtained as a white powder (17 mg, 44 %). Synthesis was performed following previously described procedures.<sup>4</sup>

<sup>1</sup>H-NMR (500 MHz, DMSO):  $\delta$  8.33 – 7.90 (m, 1 H), 7.90 – 7.58 (m, 1 H), 7.33 – 7.28 (m, 2 H), 7.28 – 7.23 (m, 2 H), 7.20 – 7.13 (m, 1 H), 6.00 – 5.60 (m, 1 H), 5.60 – 5.47 (m, 1 H), 5.42 – 5.31 (m, 1 H), 5.27 (s, 1 H), 4.80 – 4.51 (m, 1 H), 4.51 – 4.38 (m, 2 H), 4.28 – 4.20 (m, 1 H), 4.06 – 3.75 (m, 3 H), 3.64 – 3.52 (m, 1 H), 3.47 (s, 1 H), 3.32 (s, 1 H), 3.26 – 3.2 (m, 4 H), 3.22 – 3.1 (m, 3 H), 3.16 – 3.0 (m, 2 H), 3.08 – 2.9 (m, 1 H), 2.98 – 2.8 (m, 4 H), 2.46 – 2.3 (m, 2 H), 2.33 – 2.2 (m, 1 H), 2.19 – 2.0 (m, 2 H), 2.04 – 1.8 (m, 3 H), 1.86 – 1.6 (m, 5 H), 1.62 – 1.4 (m, 3 H), 1.49 – 1.2 (m, 3 H), 1.08 – 0.9 (m, 7 H), 0.92 – 0.6 (m, 18 H). HRMS:  $[M+Na]^+/C_{48}H_{79}N_5NaO_9^+$  calculated 892.5770  $m/z$ , found 892.5783  $m/z$ .

### Cy5.5-nrTCO (22)

3-(6-(((*R,E*)-cyclooct-4-en-1-yl)oxy)carbonyl)amino)hexyl)amino)-6-oxohexyl)-1,1-dimethyl-2-((1*E*,3*E*,5*E*)-5-(1,1,3-trimethyl-1,3-dihydro-2H-benzo[*e*]indol-2-ylidene)-penta-1,3-dien-1-yl)-1H-benzo[*e*]indol-3-ium chloride

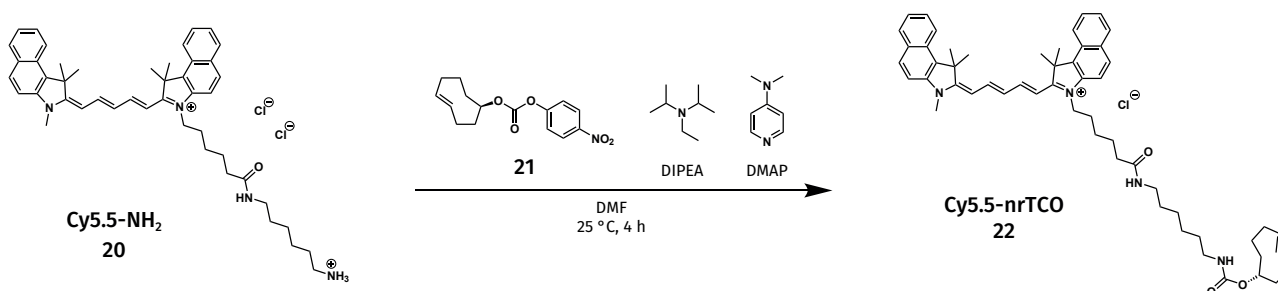

5 mg Cyanine5.5-Amine (Cy5.5-NH<sub>2</sub>, **20**, CAS: 2097714-45-7, lumiprobe, Artikel-Nr. 270C0) was dissolved as received in 1 ml ACN to be volumetrically aliquoted into 5x equal 1 mg parts into 1.5 ml Eppendorf tubes. ACN was removed on a SpeedVac. A 1 mg aliquot of Cy5.5-NH<sub>2</sub> (1.3  $\mu$ mol) in a 1.5 ml Eppendorf tube was redissolved in 500  $\mu$ l DMF. Non-release activated *trans*-cyclooctene **21** (1.2 mg, 4.1  $\mu$ mol) was dissolved in a separate 1.5 ml Eppendorf tube in 200  $\mu$ l DMF and added to the Cy5.5-NH<sub>2</sub>. 3  $\mu$ l of DIPEA (17  $\mu$ mol) and 7  $\mu$ l of a 100 mM stock solution of DMAP (0.7  $\mu$ mol) in DMF were added and the reaction was shaken for 4 h at 25 °C on a thermo shaker. Solvents were removed under reduced pressure and the reaction products were redissolved in 1.5 ml ACN:DMSO 2:1, filtered and purified by preparative HPLC. Product fractions were lyophilized to obtain Cy5.5-nrTCO (**22**) as a deep blue residue. Stock solutions of Cy5.5-nrTCO were prepared in DMSO, with concentration determined by comparing the UV trace from LCMS analysis to that of a Cy5.5-NH<sub>2</sub> stock solution of known concentration.

HRMS:  $[M]^+/C_{55}H_{69}N_4O_3^+$  calculated 833.5364  $m/z$ , found 833.5375  $m/z$ .

## 3 Cell culture

All cells were cultured at 37 °C and 5 % CO<sub>2</sub> in humidified incubators. Cells were monthly tested for mycoplasma contamination using the MycoStrip detection kit (InvivoGen, Toulouse, France). The following list summarizes the cell lines used and their respective media and passaging conditions.

### 3.1 Cell lines

- A431**                RRID:CVCL\_0037, kind gift from Michael Walser, University of Zürich. Medium: **A**; passaging: **b**, trypsinization time approximately 8 min
- MDA-MB-468**      RRID:CVCL\_0419; kind gift from Cora-Ann Schöneberger/Palivan-Group, University of Basel. Medium: **A**; passaging: **b**, trypsinization time approximately 6 min
- MCF-7**             RRID:CVCL\_0031; ACC 115, DSMZ, Braunschweig, Germany. Medium: **A**; passaging: **b**, trypsinization time approximately 5 min
- SW620**            RRID:CVCL\_0547; CCL-227, ATCC, Manassas, USA. Medium: **A**; passaging: **a**, trypsinization time approximately 4 min
- A**            Medium A consists of Dulbecco's Modified Eagle's Medium - high glucose (DMEM, D5796-500ML, Merck/Sigma-Aldrich, Darmstadt, Germany) supplemented with 10 % fetal calf serum (FCS, 2-01F00-I, BioConcept, Allschwil, Switzerland) and 1 % penicillin-streptomycin (4-01F00-H, BioConcept, Allschwil, Switzerland).
- a**            Cells were detached using 0.05 % trypsin-EDTA (25300-054, Gibco/ThermoFisher Scientific, Waltham, MA, USA).
- b**            Cells were detached using 0.25 % trypsin-EDTA (25200-056, Gibco/ThermoFisher Scientific, Waltham, MA, USA).

### 3.2 Typical seeding conditions

- A431**                500 k, 2 ml, 6-well plates, 24 h/overnight until treatment
- MCF-7**             600 k, 2 ml, 6-well plates, 24 h/overnight until treatment
- SW620**            800 k, 1 ml, 12-well plates, 24 h/overnight until treatment
- MDA-MB-468**      500 k, 2 ml, 6-well plates, 24 h/overnight until treatment

## 4 SDS-PAGE

Proteins were separated using sodium dodecyl sulfate-polyacrylamide gel electrophoresis (SDS-PAGE) on a Mini-PRO-TEAN Tetra system (Bio-Rad, Hercules, CA, USA) using 1.5 mm hand-cast discontinuous 15-well (nominal well volumes of 40  $\mu$ l) mini-gels. The resolving/running gel mixture (8 %) for one gel was prepared by combining 2 ml of a 40 % acrylamide/bis-acrylamide solution (CAS: 79-06-1 and 110-26-9, 37.5:1, Cat. 330225000, Thermo Scientific, Waltham, MA, USA); 5.3 ml milliQ; 2.5 ml tris buffer (1.5 M, pH 8.8 at room temperature, prepared from tris base, (CAS: 77-86-1, Cat. A1086, Pan-Reac/AppliChem/ITW Reagents, Darmstadt, Germany), adjusted with HCl (25 % for analysis EMSURE, CAS: 7647-01-0, Cat. 1.00316, Supelco/Sigma-Aldrich, St. Louis, MO, USA)); and 100  $\mu$ l SDS 10 % (w/v) (prepared from 10 g SDS (CAS: 151-21-3, Cat. A2262, PanReac/AppliChem/ITW Reagents, Darmstadt, Germany) dissolved in a total volume of 100 ml milliQ). The mixture was homogenized by gentle pipetting, followed by the immediate addition of 5  $\mu$ l TEMED (*N,N,N',N'*-tetramethylethylenediamine, CAS: 110-18-9, Cat. 17919, Thermo Scientific, Waltham, MA, USA) and 50  $\mu$ l of a 10 % (w/v) APS (Ammonium persulfate, CAS: 7727-54-0, Cat. A3678, Sigma-Aldrich, St. Louis, MO, USA) solution in milliQ. After thorough but gentle mixing with a serological pipette, the solution was promptly poured between the glass plates to approximately 2 cm below the top edge. The top of the gel was carefully leveled using ethanol and left to polymerize at room temperature.

The stacking gel was prepared similarly to the resolving gel by combining 0.25 ml acrylamide/bis-acrylamide solution; 1.6 ml milliQ; 0.65 ml Tris-HCl (1.0 M, pH 6.8 at room temperature); 25  $\mu$ l 10 % (w/v) SDS; 2.5  $\mu$ l TEMED; and 12.5  $\mu$ l 10 % (w/v) APS. The ethanol overlay was completely removed from the polymerized resolving gel by aspiration with a blunt needle connected to a vacuum line. The stacking gel mixture was poured on top of the resolving gel, and a 15-well comb was carefully inserted while avoiding bubble formation. The gel was allowed to polymerize for 30 min at room temperature.

Fully polymerized gels were removed from the casting apparatus and placed into the electrode assembly. Combs were gently removed, and wells were flushed with tris-glycine running buffer (10x stock prepared from 30 g tris base; 144 g glycine (CAS: 56-40-6, Cat. #1023, GERBU Biotechnik GmbH, Heidelberg, Germany); and 10 g SDS, dissolved in a final volume of 1 l milliQ. Diluted to 1x for use by combining 0.1 l of 10x stock with 0.9 l milliQ) for final concentrations of 25 mM Tris, 192 mM glycine, and 0.1 % SDS at pH 8.3 (left unadjusted). The electrode chamber was filled with sufficient running buffer to ensure complete submersion of all wells.

The loading dye used was either 5x homemade (300 mM Tris-HCl pH 6.8 at room temperature; 10 % SDS (w/v); 50 % glycerol; 0.05 % bromophenol blue (w/v) (CAS: 115-39-9, Cat. B0631, TCI, Tokyo, Japan), 500 mM DTT (CAS: 3483-12-3, Cat. A1101, PanReac/AppliChem/ITW Reagents, Darmstadt, Germany), used from single-use frozen aliquots), or 3x from a commercial vendor (Blue Protein Loading Dye, B7703S, New England BioLabs, Ipswich, MA, USA; prepared from 1 part 3x SDS Blue Loading Buffer (187.6 mM Tris-HCl pH 7.0; 6 % SDS (w/v); 30 % glycerol; 0.03 % bromophenol blue (w/v)) and 1/10 part 30x Reducing Agent (1.25 M DTT). Protein aliquots were combined with loading dye (for 5x: 4 parts sample, 1 part loading dye; for 3x: 2 parts sample, 1 part loading dye) and in either case heated at 98 °C for 5 min while shaking at 300 rpm, then immediately placed on ice to cool and briefly spun down.

Samples were carefully loaded into wells. Prestained molecular weight marker (AcuteBand Pre-Stained Protein Ladder, LU5001-2500, LubioScience GmbH, Zürich, Switzerland) was loaded (commonly 2  $\mu$ l), typically in both outer lanes plus an additional asymmetrically placed lane to facilitate gel orientation during subsequent analysis. The loaded gel assembly was placed in the electrophoresis tank filled with running buffer. Electrophoresis was performed using a programmable power supply (PowerPac Basic, Bio-Rad, Hercules, CA, USA) at constant voltage, initially at 80 V until the tracking dye reached the resolving gel interface (approximately 15 min-20 min), then at 120 V-140 V until the loading dye front approached within approximately 0.5 cm of the gel bottom (approximately 60 min-90 min depending on the protein size range of interest). Following electrophoretic separation, gels were removed from the glass plates and processed for either in-gel fluorescence detection or western blotting analysis.

## 5 In-gel fluorescence

Cells were seeded as described in section 3.2. For blocking experiments, cells were treated with afatinib at indicated concentrations and incubated for indicated duration, otherwise this step was skipped. Cells were treated with afatinib-tetrazine from DMSO stocks at indicated concentrations with final DMSO concentrations kept below 0.1 %. Cells were incubated for indicated times after which medium was removed and the cells were washed twice with 2 ml PBS (Cat. D8537, Sigma-Aldrich, St. Louis, MO, USA) and then harvested in 1 ml PBS by scraping (Cell Scrapers, Cat. 83.3951, Sarstedt, Nümbrecht, Germany). Cells were collected by centrifugation (15 min, 8.8 krcf, 4 °C) and the supernatant was removed by suction and discarded. Cell pellets were stored at -80 °C until further processing.

Cell pellets were resuspended in RIPA lysis buffer (50 mM Tris-HCl pH 8 at room temperature, 150 mM NaCl (CAS: 7647-14-5, Cat. A2942, PanReac/AppliChem/ITW Reagents, Darmstadt, Germany), 1 % Triton X-100 (CAS: 9002-93-1, Cat. T8787, Sigma-Aldrich, St. Louis, MO, USA), 0.25 % sodium deoxycholate (CAS: 302-95-4, Cat. 30970, Sigma-Aldrich, St. Louis, MO, USA), 0.1 % SDS, supplemented with cOmplete Mini Protease Inhibitor (Cat. 11836153001, Roche, Basel, Switzerland) and 1 mM sodium orthovanadate (CAS: 13721-39-6, Cat. 450243, Sigma-Aldrich, St. Louis, MO, USA)), left on ice for 30 min and centrifuged at 16 krcf and 4 °C for 15 min. The supernatant was collected, and protein concentration was measured (DC Protein Assay, Cat. #5000116, Bio-Rad, Hercules, CA, USA). Protein concentration was normalized to typically around 1 µg µl<sup>-1</sup>. Cy5.5-nrTCO was added from a DMSO stock solution to a final concentration of 1 µM. Samples were spun down and put on a thermoshaker for 1 h at 37 °C, shaking at 300 rpm. Samples were spun down and loading dye (see section 4) was added. Samples were heated to 98 °C for 4 min, shaking at 300 rpm. If not loaded immediately, samples were stored at -20 °C until use for which they were reheated to 98 °C again under the same conditions as before. Proteins were separated on hand-cast SDS-PAGE gels (again, see section 4). Gels were then imaged either on a Bio-Rad ChemiDoc MP using the Cy5.5 protocol (Light: Red Epi illumination; Filter: 695/55 (Filter 2)) or an Odyssey XF in the 700 channel. For protein loading control, gels were stained using a commercial Coomassie stain (QuickBlue Protein Stain, Cat. LU001000, LubioScience GmbH, Zürich, Switzerland). Gels were covered with QuickBlue solution and shaken at room temperature for at least 30 min before imaging. Images were acquired again on either a ChemiDoc or an Odyssey XF.

## 6 Western blotting

Cells were seeded as described in section 3.2. After cell growth, medium was removed and the cells were washed twice with 2 ml PBS (Cat. D8537, Sigma-Aldrich, St. Louis, MO, USA) and then harvested in 1 ml PBS by scraping (Cell Scrapers, Cat. 83.3951, Sarstedt, Nümbrecht, Germany). Cells were collected by centrifugation (15 min, 8.8 krcf, 4 °C) and the supernatant was removed by suction and discarded. Cell pellets were stored at -80 °C until further processing.

Cell pellets were resuspended in RIPA lysis buffer (50 mM Tris-HCl pH 8 at room temperature, 150 mM NaCl (CAS: 7647-14-5, Cat. A2942, PanReac/AppliChem/ITW Reagents, Darmstadt, Germany), 1 % Triton X-100 (CAS: 9002-93-1, Cat. T8787, Sigma-Aldrich, St. Louis, MO, USA), 0.25 % sodium deoxycholate (CAS: 302-95-4, Cat. 30970, Sigma-Aldrich, St. Louis, MO, USA), 0.1 % SDS, supplemented with cOmplete Mini Protease Inhibitor (Cat. 11836153001, Roche, Basel, Switzerland) and 1 mM sodium orthovanadate (CAS: 13721-39-6, Cat. 450243, Sigma-Aldrich, St. Louis, MO, USA)), left on ice for 30 min and centrifuged at 16 krcf and 4 °C for 15 min. The supernatant was collected, and protein concentration was measured (DC Protein Assay, Cat. #5000116, Bio-Rad, Hercules, CA, USA). Protein concentration was normalized to typically around 1 µg µl<sup>-1</sup>. Samples were combined with loading dye (see section 4), heated to 98 °C for 4 min, shaking at 300 rpm. If not loaded immediately, samples were stored at -20 °C until use for which they were reheated to 98 °C again under the same conditions as before. Proteins were separated on hand-cast SDS-PAGE gels (again, see section 4). Proteins were transferred onto nitrocellulose membranes using a semi-dry blotting apparatus (Trans-Blot Turbo, Bio-Rad, Hercules, CA, USA) and corresponding transfer packs (Mini Format, 0.2 µm Nitrocellulose, Single Application, Cat. #1704158, Bio-Rad, Hercules, CA, USA) using built-in transfer protocols (StandardSD (25 V, 1 A, 30 min) or 1.5 mm Gel (25 V, 1.3 A, 10 min)). Protein loading was assessed using the Revert 700 Total Protein Stain (TPS) kit (Cat. 926-11016, LI-COR Biotechnology, Lincoln, NE, USA) and imaged on an Odyssey XF (LI-COR Biotechnology, Lincoln, NE, USA). Membranes were then blocked with Intercept (TBS) Blocking Buffer (Cat. 927-60001, LI-COR Biotechnology, Lincoln, NE, USA) for 1 h at room temperature or overnight at 4 °C while shaking. Blots were incubated with primary antibodies (see below) diluted in TBST (20 mM Tris-HCl pH 7.6 adjusted at room temperature, 150 mM NaCl, supplemented with 0.1 % Tween 20 (CAS: 9005-64-5, Cat. 93773, Sigma-Aldrich, St. Louis, MO, USA)) overnight at 4 °C, washed three times for 5 min with 10 ml TBST, incubated with secondary antibodies (see below) for 1 h at room temperature, and washed three times for 5 min with 10 ml TBST. Membrane manipulation steps were typically performed with membranes placed in transparent polypropylene or polycarbonate Jass card boxes (standard Swiss playing card boxes). The protein of interest was preferentially detected using fluorescence at 800 nm. Specific antibody dilutions and additional experimental details are provided in figure legends of full blot images. Images were acquired using a LI-COR Odyssey XF and processed, including integration, using LI-COR EmpiriaStudio (currently at version 3.2) software.

### 6.1 Primary antibodies

**anti-EGFR**      Anti-EGFR antibody [EP38Y]; Abcam Cat# ab52894, RRID:AB\_869579, Host/Isotype: Rabbit/IgG (monoclonal); 1:1 000 dilution in TBST

### 6.2 Secondary antibodies

**R800**           IRDye 800CW Goat anti-Rabbit IgG Secondary Antibody, LICORbio Cat# 926-32211, RRID:AB\_621843; 1:10 000 dilution in TBST



## 7 Cell viability

### 7.1 Resazurin assay (single treatment)

In clear, flat bottom 96-well plates (Cat. 83.3924, Sarstedt, Nümbrecht, Germany), 10 000 cells were seeded in 100  $\mu$ l of complete medium (see 3.1) and grown for 24 h. Typically, outer wells of the plates were filled with medium but not used for experiments to minimize edge effects and provide evaporation protection. A separate 96-well plate was preloaded with complete medium. Compounds from DMSO stock were added to first rows of the plate and serially diluted (typically in 5-fold dilutions for a total of 8 steps) on an ASSIST PLUS (Integra, Zizers, Switzerland) pipetting robot. For MMAE and MMAE-TCO, tips were automatically changed after every dilution step or serial dilutions were started from concentrations no higher than 100 nM due to otherwise observed carryover. Medium from cell growth plates was removed and replaced with 100  $\mu$ l of pre-treated medium. Each condition was tested as technical triplicates on the same plate. Cells were grown for 72 h under standard conditions after which 20  $\mu$ l of a commercial resazurin solution (CellTiter-Blue, Cat. G8081, Promega, Madison, WI, USA) were added and cells were further incubated for 2 h. Fluorescence was measured in *Fluorescence Top Reading* mode on a Spark microplate reader (Tecan, Männedorf, Switzerland) with  $\lambda_{ex}$  = 560 nm and  $\lambda_{em}$  = 590 nm. Data was background subtracted (background = 100  $\mu$ l medium + 20  $\mu$ l resazurin) and normalized to full viability wells. A three- or four-parameter log-logistic function was fit using the drc package in R (R version 4.4.0 (2024-04-24))<sup>5,6</sup> to calculate IC<sub>50</sub> values. If not noted otherwise, bars represent means, and error bars represent standard error of the mean (SEM) as calculated by tidyverse's stat\_summary function. All data points in graphs represent independent biological experiments.

### 7.2 Resazurin assay (co-incubation)

Cells were seeded and grown as described above. In a Falcon tube, indicated tetrazine was diluted in growth medium. Of this solution, 50  $\mu$ l were transferred to cells for co-incubation experiments, leaving out wells for full viability control. Medium in full viability control wells was replaced by fresh medium. Serial dilutions of caged drugs were prepared as indicated above. To the tetrazine treated medium, 50  $\mu$ l of prepared serial dilutions were added. Indicated concentrations for tetrazines and caged drugs correspond to the concentrations in these final 100  $\mu$ l of medium. The assay was completed following the regular resazurin assay procedure as described above.

### 7.3 Resazurin assay (pre-targeting)

Cells were seeded and grown as described above. In a Falcon tube, indicated tetrazine was diluted in growth medium. Of this solution, 50  $\mu$ l were transferred to cells for pre-targeting experiments, leaving out wells for full viability control. Medium in full viability control wells was replaced by fresh medium. Cells were then incubated/pre-targeted for the indicated time. All wells, including full viability controls, were then washed three times with 100  $\mu$ l medium. Washes were performed roughly 20 min apart. After the medium of the final wash was removed, 50  $\mu$ l of untreated medium was added. Serial dilutions of caged drugs were prepared as indicated above. 50  $\mu$ l of prepared serial dilutions were added to the cells. Indicated concentrations of caged drugs correspond to the concentrations in these final 100  $\mu$ l of medium. The assay was completed following the regular resazurin assay procedure.

## 8 Software

Data analysis and visualization were performed in R<sup>6</sup> using the `tidyverse`<sup>7</sup> collection for data processing and `ggplot2`<sup>8</sup> for plotting. Figures were enhanced using `cowplot`<sup>9</sup> for consistent themes and `ggbeeswarm`<sup>10</sup> for data point positioning. Dose-response curves were fitted using 3- or 4-parameter log-logistic models implemented via `LL.3()` and `LL.4()` functions from the `drc` package,<sup>5</sup> from which  $IC_{50}$  values were calculated. The 3-parameter model (with lower asymptote constrained to zero) was used when the 4-parameter model failed to converge to a reasonable lower asymptote, typically when insufficient data points were available at high compound concentrations. Color schemes were based on or inspired by Paul Tol’s scientific color palettes<sup>11</sup> with additional support from `RColorBrewer`.<sup>12</sup> Figure text was set in Fira Sans (Mozilla Foundation/Telefónica S.A.).

This supporting information was typeset in L<sup>A</sup>T<sub>E</sub>X (X<sub>Y</sub>L<sup>A</sup>T<sub>E</sub>X) using KOMA-Script and numerous packages. Gratitude to Donald Knuth for T<sub>E</sub>X, and to Markus Kohm for KOMA-Script (with apologies for any typographical transgressions). Special thanks to the entire L<sup>A</sup>T<sub>E</sub>X community for maintaining this exceptional typesetting environment.

The main body text and supporting information were edited using artificial intelligence (AI) language models, including the large language model (LLM) Claude by Anthropic and the writing assistant DeepL Write, for grammar, clarity, and style improvements. These AI tools were used solely for language refinement and did not generate any scientific content, analysis, or conclusions. All AI-suggested changes were manually reviewed and verified for scientific accuracy. The paper also incorporates valuable feedback from human proofreaders Basilius, Angel, Seemon, and Marco.

## **9 Supporting figures and tables**

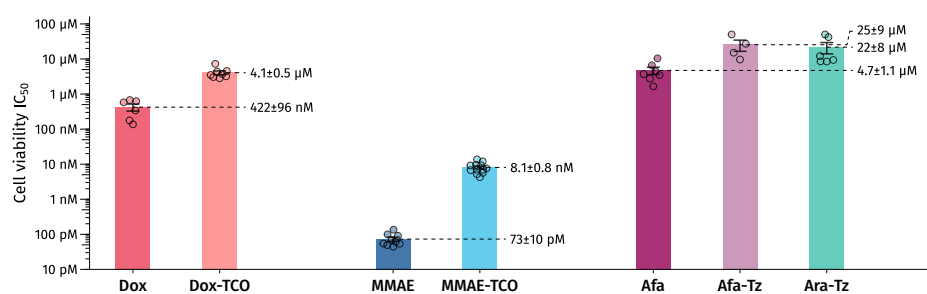

**Figure S2:** Complete cell viability data (IC<sub>50</sub> values) of single agent treatments in A431 cells. Cell viability data from Fig. 3A(iii) is included: Dox, Dox-TCO, MMAE, and MMAE-TCO. Additional cell viability data shown for Afa, Afa-Tz, and Ara-Tz as single agents. Cell viability assays were performed using resazurin at 72 h. Data points represent independent biological experiments, bars and error bars indicate mean and SEM, respectively. Individual data points and summary statistics are provided in Tab. S1 and Tab. S7.

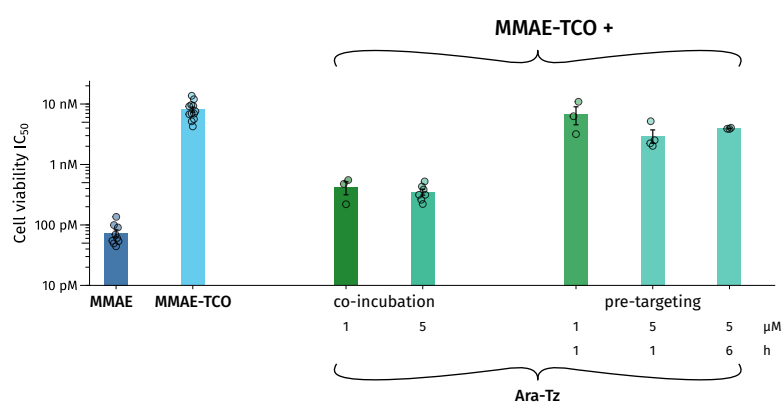

**Figure S3:** Complete cell viability data (IC<sub>50</sub> values) using the non-binding control Ara-Tz in A431 cells. Cell viability data from Fig. 3A(iii) and Fig. 4B is included: MMAE, MMAE-TCO, and pre-targeting with Ara-Tz at different time points and concentrations. Additional cell viability data shown for co-incubation of Ara-Tz at 1 μM and 5 μM with MMAE-TCO. Cell viability assays were performed using resazurin at 72 h. Data points represent independent biological experiments, bars and error bars indicate mean and SEM, respectively. Individual data points and summary statistics are provided in Tab. S1 and Tab. S6.

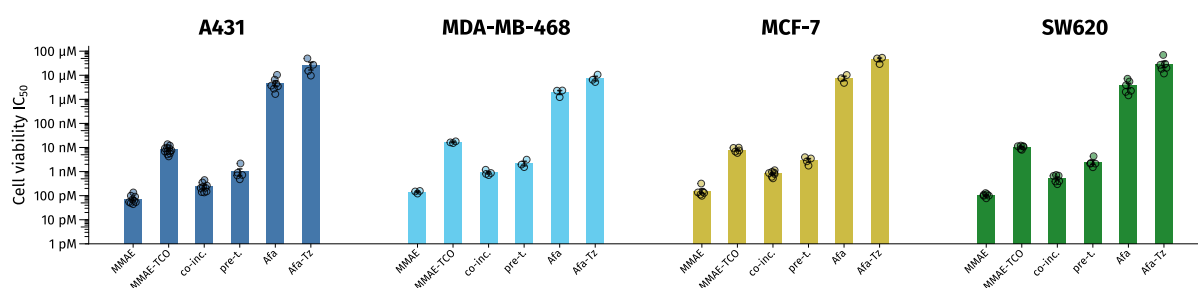

**Figure S4:** Complete cell viability data (IC<sub>50</sub> values) for cell lines A431, MDA-MB-468, MCF-7, and SW620 as seen in Fig. 5. Cell viability data from Fig. 5C is included: MMAE, MMAE-TCO, and pre-targeting (pre-t.) with Afa-Tz at 5  $\mu$ M for 1 h followed by MMAE-TCO. Additional cell viability data shown for co-incubation (co-inc.) of Afa-Tz at 5  $\mu$ M with MMAE-TCO, as well as Afa and Afa-Tz as single agents. Cell viability assays were performed using resazurin at 72 h. Data points represent independent biological experiments, bars and error bars indicate mean and SEM, respectively. Individual data points and summary statistics are provided in Tab. S7.

All samples in A431  
 8 % SDS-PAGE mini gel (hand-cast), 1.5 mm, 15-well  
 5x Loading Dye  
 8 µg (26 µl) of protein per lane  
 Cy5.5-nrTCO from 20 µM DMSO stockt  
 Ladder: AcuteBand Pre-Stained Protein Ladder, 2 µl

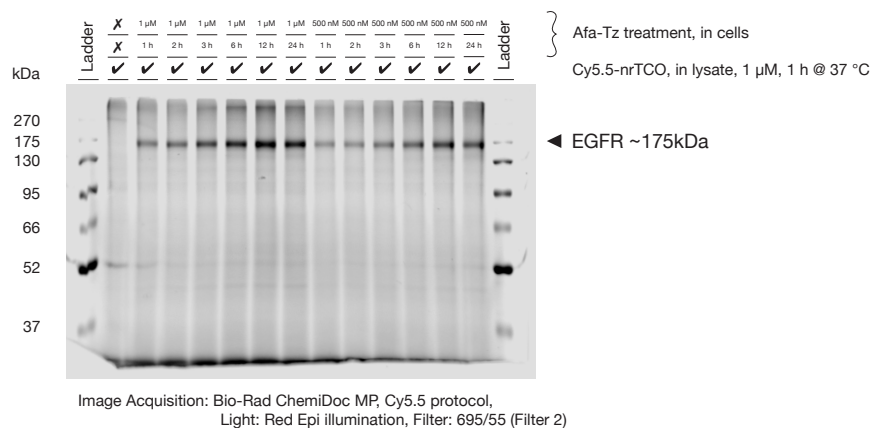

Figure S5: Full in-gel fluorescence gel image of Fig. 2D.

8 % SDS-PAGE mini gel (hand-cast), 1.5 mm, 15-well  
 3x Loading Dye  
 13 µg (10 µl) of protein per lane  
 Cy5.5-nrTCO from 10 µM DMSO stockt  
 Ladder: AcuteBand Pre-Stained Protein Ladder

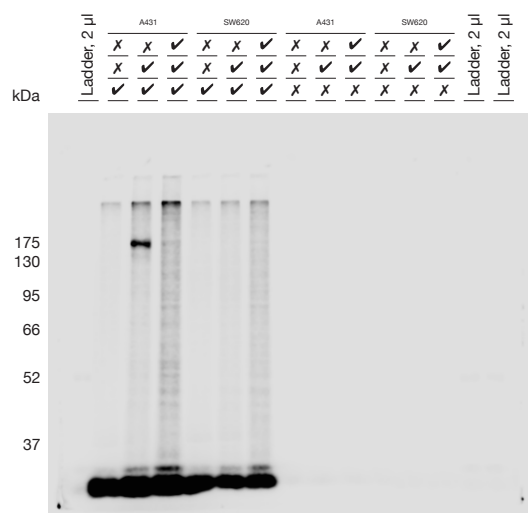

Afatinib, 10 µM, 2 h, in cells  
 then Afa-Tz, 5 µM, 1 h, in cells  
 Cy5.5-nrTCO, in lysate, 1 µM, 1 h @ 37 °C

◀ EGFR ~175kDa

Image Acquisition: Odyssey XF, 700 channel, 10 min

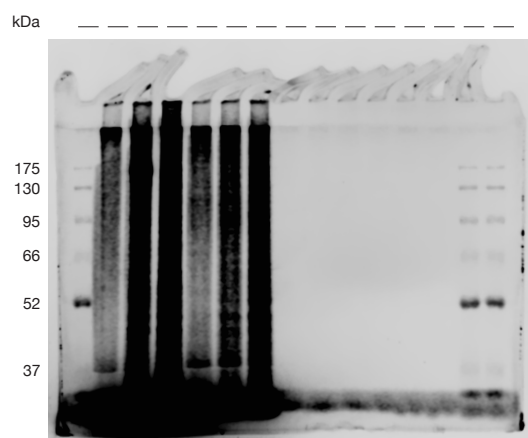

same image as above with adjusted display values  
 to show ladder and faint bands

Figure S6: Full in-gel fluorescence gel image of Fig. 2E.



**Figure 1.** Western blot analysis of the effect of the anti-HER-2/neu antibody on the expression of the p185<sup>HER-2/neu</sup> protein in the cell lines A431, MDA-MB-468, MCF-7, and SW620. The cells were treated with the anti-HER-2/neu antibody for 24 h. The cell lysates were separated by SDS-PAGE and transferred to a nitrocellulose membrane. The membrane was probed with anti-HER-2/neu antibody. The p185<sup>HER-2/neu</sup> protein was detected by enhanced diaminobenzidine tetrahydrochloride (DAB) staining. The results are shown as a representative example of three independent experiments. The molecular weight markers (kDa) are indicated on the left. The lanes are labeled as follows: Ladder, 3  $\mu$ l; A431; MDA-MB-468; MCF-7; SW620; Ladder, 2  $\mu$ l.

◀ EGFR ~175kDa

Coomassie stain (QuickBlue)

Image Acquisition: Bio-Rad ChemiDoc MP

25

Untreated whole-cell lysate  
 3X Blue Protein Loading Dye  
 10 µg (25 µl) of protein per lane  
 Ladder: AcuteBand Pre-Stained Protein Ladder, 2 µl  
 8 % SDS-PAGE mini gel (hand-cast), 1.5 mm, 15-well  
 Semi-dry transfer to Nitrocellulose Membrane  
 with Trans-Blot Turbo (BIO-RAD) using built in 1.5 mm GEL protocol

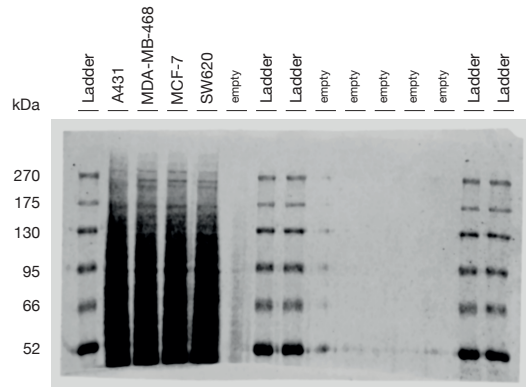

Image Acquisition: Odyssey XF, 700 channel, 10 min

Revert 700 Total Protein Stain for Western Blot Normalization  
 (LI-COR, 926-11021)

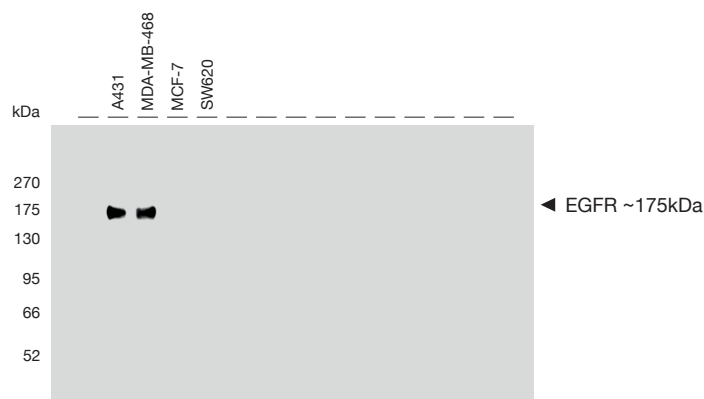

Image Acquisition: Odyssey XF, 800 channel, 10 min

Primary: Recombinant Anti-EGFR antibody [EP38Y] (Rabbit, monoclonal, abcam, ab52894, RRID:AB\_869579)  
 1:1000 in TBST, incubated overnight at 4 °C  
 Secondary: IRDye 800CW Goat anti-Rabbit IgG Secondary Antibody (LI-COR, 926-32211, RRID:AB\_621843)  
 1:10000 in TBST, incubated for 1 h at room temperature

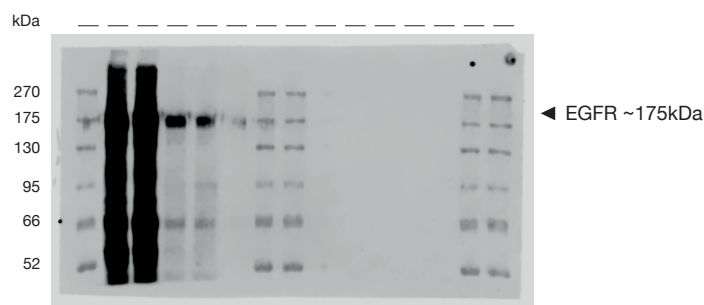

same image as above with adjusted display values  
 to show ladder and faint bands

Figure S8: Full membrane image of Fig. 5A.

**Table S1:** Individual data points and summary statistics used to create Fig. 3A(iii). Bold rows show mean  $IC_{50} \pm SEM$  in  $\mu M$  calculated from all independent experiments listed below each condition.

| Condition       | $IC_{50}$ / $\mu M$     | Experiment |
|-----------------|-------------------------|------------|
| <b>Dox</b>      | 420 000 $\pm$ 100 000   |            |
| Dox             | 580 000                 | 1          |
| Dox             | 342 000                 | 2          |
| Dox             | 177 000                 | 3          |
| Dox             | 625 000                 | 4          |
| Dox             | 674 000                 | 5          |
| Dox             | 137 000                 | 6          |
| <b>Dox-TCO</b>  | 4 100 000 $\pm$ 500 000 |            |
| Dox-TCO         | 3 210 000               | 1          |
| Dox-TCO         | 4 540 000               | 2          |
| Dox-TCO         | 4 370 000               | 3          |
| Dox-TCO         | 7 260 000               | 4          |
| Dox-TCO         | 3 050 000               | 5          |
| Dox-TCO         | 3 720 000               | 6          |
| Dox-TCO         | 2 820 000               | 7          |
| Dox-TCO         | 3 510 000               | 8          |
| <b>MMAE</b>     | 73 $\pm$ 10             |            |
| MMAE            | 90.8                    | 1          |
| MMAE            | 69.2                    | 2          |
| MMAE            | 99.5                    | 3          |
| MMAE            | 44.3                    | 4          |
| MMAE            | 54.6                    | 5          |
| MMAE            | 53.8                    | 6          |
| MMAE            | 49.4                    | 7          |
| MMAE            | 60.7                    | 8          |
| MMAE            | 136                     | 9          |
| <b>MMAE-TCO</b> | 8 100 $\pm$ 800         |            |
| MMAE-TCO        | 5 650                   | 1          |
| MMAE-TCO        | 6 930                   | 2          |
| MMAE-TCO        | 7 590                   | 3          |
| MMAE-TCO        | 4 260                   | 4          |
| MMAE-TCO        | 6 780                   | 5          |
| MMAE-TCO        | 9 260                   | 6          |
| MMAE-TCO        | 5 170                   | 7          |
| MMAE-TCO        | 6 950                   | 8          |
| MMAE-TCO        | 9 640                   | 9          |
| MMAE-TCO        | 9 190                   | 10         |
| MMAE-TCO        | 12 000                  | 11         |
| MMAE-TCO        | 13 700                  | 12         |

**Table S2:** Individual data points and summary statistics used to create Fig. 3B(i). Bold rows show mean  $IC_{50} \pm SEM$  in  $\mu M$  calculated from all independent experiments listed below each condition.

| Condition                                                  | $IC_{50} / \mu M$                         | Experiment |
|------------------------------------------------------------|-------------------------------------------|------------|
| <b>Co-incubation 1 <math>\mu M</math> Afa-Tz + Dox-TCO</b> | <b>1 500 000 <math>\pm</math> 300 000</b> |            |
| Co-incubation 1 $\mu M$ Afa-Tz + Dox-TCO                   | 1 600 000                                 | 1          |
| Co-incubation 1 $\mu M$ Afa-Tz + Dox-TCO                   | 1 330 000                                 | 2          |
| Co-incubation 1 $\mu M$ Afa-Tz + Dox-TCO                   | 1 540 000                                 | 3          |
| Co-incubation 1 $\mu M$ Afa-Tz + Dox-TCO                   | 2 660 000                                 | 4          |
| Co-incubation 1 $\mu M$ Afa-Tz + Dox-TCO                   | 579 000                                   | 5          |
| <b>Co-incubation 100 nM Afa-Tz + Dox-TCO</b>               | <b>3 400 000 <math>\pm</math> 600 000</b> |            |
| Co-incubation 100 nM Afa-Tz + Dox-TCO                      | 5 060 000                                 | 1          |
| Co-incubation 100 nM Afa-Tz + Dox-TCO                      | 2 700 000                                 | 2          |
| Co-incubation 100 nM Afa-Tz + Dox-TCO                      | 2 740 000                                 | 3          |
| Co-incubation 100 nM Afa-Tz + Dox-TCO                      | 2 980 000                                 | 4          |
| <b>Co-incubation 5 <math>\mu M</math> Afa-Tz + Dox-TCO</b> | <b>570 000 <math>\pm</math> 160 000</b>   |            |
| Co-incubation 5 $\mu M$ Afa-Tz + Dox-TCO                   | 448 000                                   | 1          |
| Co-incubation 5 $\mu M$ Afa-Tz + Dox-TCO                   | 451 000                                   | 2          |
| Co-incubation 5 $\mu M$ Afa-Tz + Dox-TCO                   | 1 060 000                                 | 3          |
| Co-incubation 5 $\mu M$ Afa-Tz + Dox-TCO                   | 335 000                                   | 4          |
| <b>Co-incubation 500 nM Afa-Tz + Dox-TCO</b>               | <b>2 000 000 <math>\pm</math> 500 000</b> |            |
| Co-incubation 500 nM Afa-Tz + Dox-TCO                      | 2 880 000                                 | 1          |
| Co-incubation 500 nM Afa-Tz + Dox-TCO                      | 1 110 000                                 | 2          |
| Co-incubation 500 nM Afa-Tz + Dox-TCO                      | 1 180 000                                 | 3          |
| Co-incubation 500 nM Afa-Tz + Dox-TCO                      | 2 840 000                                 | 4          |
| <b>Dox</b>                                                 | <b>420 000 <math>\pm</math> 100 000</b>   |            |
| Dox                                                        | 580 000                                   | 1          |
| Dox                                                        | 342 000                                   | 2          |
| Dox                                                        | 177 000                                   | 3          |
| Dox                                                        | 625 000                                   | 4          |
| Dox                                                        | 674 000                                   | 5          |
| Dox                                                        | 137 000                                   | 6          |
| <b>Dox-TCO</b>                                             | <b>4 100 000 <math>\pm</math> 500 000</b> |            |
| Dox-TCO                                                    | 3 210 000                                 | 1          |
| Dox-TCO                                                    | 4 540 000                                 | 2          |
| Dox-TCO                                                    | 4 370 000                                 | 3          |
| Dox-TCO                                                    | 7 260 000                                 | 4          |
| Dox-TCO                                                    | 3 050 000                                 | 5          |
| Dox-TCO                                                    | 3 720 000                                 | 6          |
| Dox-TCO                                                    | 2 820 000                                 | 7          |
| Dox-TCO                                                    | 3 510 000                                 | 8          |

**Table S3:** Individual data points and summary statistics used to create Fig. 3B(ii). Bold rows show mean  $IC_{50} \pm SEM$  in  $\mu M$  calculated from all independent experiments listed below each condition.

| Condition                                                   | $IC_{50} / \mu M$ |           | Experiment |
|-------------------------------------------------------------|-------------------|-----------|------------|
| <b>Co-incubation 1 <math>\mu M</math> Afa-Tz + MMAE-TCO</b> | 560               | $\pm 170$ |            |
| Co-incubation 1 $\mu M$ Afa-Tz + MMAE-TCO                   | 464               |           | 1          |
| Co-incubation 1 $\mu M$ Afa-Tz + MMAE-TCO                   | 249               |           | 2          |
| Co-incubation 1 $\mu M$ Afa-Tz + MMAE-TCO                   | 1 060             |           | 3          |
| Co-incubation 1 $\mu M$ Afa-Tz + MMAE-TCO                   | 484               |           | 4          |
| <b>Co-incubation 10 nM Afa-Tz + MMAE-TCO</b>                | 3 300             | $\pm 700$ |            |
| Co-incubation 10 nM Afa-Tz + MMAE-TCO                       | 3 710             |           | 1          |
| Co-incubation 10 nM Afa-Tz + MMAE-TCO                       | 1 910             |           | 2          |
| Co-incubation 10 nM Afa-Tz + MMAE-TCO                       | 2 500             |           | 3          |
| Co-incubation 10 nM Afa-Tz + MMAE-TCO                       | 5 030             |           | 4          |
| <b>Co-incubation 100 nM Afa-Tz + MMAE-TCO</b>               | 380               | $\pm 70$  |            |
| Co-incubation 100 nM Afa-Tz + MMAE-TCO                      | 312               |           | 1          |
| Co-incubation 100 nM Afa-Tz + MMAE-TCO                      | 356               |           | 2          |
| Co-incubation 100 nM Afa-Tz + MMAE-TCO                      | 571               |           | 3          |
| Co-incubation 100 nM Afa-Tz + MMAE-TCO                      | 283               |           | 4          |
| <b>Co-incubation 5 <math>\mu M</math> Afa-Tz + MMAE-TCO</b> | 340               | $\pm 60$  |            |
| Co-incubation 5 $\mu M$ Afa-Tz + MMAE-TCO                   | 234               |           | 1          |
| Co-incubation 5 $\mu M$ Afa-Tz + MMAE-TCO                   | 352               |           | 2          |
| Co-incubation 5 $\mu M$ Afa-Tz + MMAE-TCO                   | 445               |           | 3          |
| <b>Co-incubation 50 nM Afa-Tz + MMAE-TCO</b>                | 1 200             | $\pm 300$ |            |
| Co-incubation 50 nM Afa-Tz + MMAE-TCO                       | 870               |           | 1          |
| Co-incubation 50 nM Afa-Tz + MMAE-TCO                       | 547               |           | 2          |
| Co-incubation 50 nM Afa-Tz + MMAE-TCO                       | 1 820             |           | 3          |
| Co-incubation 50 nM Afa-Tz + MMAE-TCO                       | 769               |           | 4          |
| Co-incubation 50 nM Afa-Tz + MMAE-TCO                       | 1 140             |           | 5          |
| Co-incubation 50 nM Afa-Tz + MMAE-TCO                       | 2 270             |           | 6          |
| <b>Co-incubation 500 nM Afa-Tz + MMAE-TCO</b>               | 500               | $\pm 200$ |            |
| Co-incubation 500 nM Afa-Tz + MMAE-TCO                      | 223               |           | 1          |
| Co-incubation 500 nM Afa-Tz + MMAE-TCO                      | 187               |           | 2          |
| Co-incubation 500 nM Afa-Tz + MMAE-TCO                      | 464               |           | 3          |
| Co-incubation 500 nM Afa-Tz + MMAE-TCO                      | 249               |           | 4          |
| Co-incubation 500 nM Afa-Tz + MMAE-TCO                      | 544               |           | 5          |
| Co-incubation 500 nM Afa-Tz + MMAE-TCO                      | 1 500             |           | 6          |
| <b>MMAE</b>                                                 | 73                | $\pm 10$  |            |
| MMAE                                                        | 90.8              |           | 1          |
| MMAE                                                        | 69.2              |           | 2          |
| MMAE                                                        | 99.5              |           | 3          |
| MMAE                                                        | 44.3              |           | 4          |
| MMAE                                                        | 54.6              |           | 5          |
| MMAE                                                        | 53.8              |           | 6          |
| MMAE                                                        | 49.4              |           | 7          |
| MMAE                                                        | 60.7              |           | 8          |
| MMAE                                                        | 136               |           | 9          |
| <b>MMAE-TCO</b>                                             | 8 100             | $\pm 800$ |            |
| MMAE-TCO                                                    | 5 650             |           | 1          |
| MMAE-TCO                                                    | 6 930             |           | 2          |
| MMAE-TCO                                                    | 7 590             |           | 3          |
| MMAE-TCO                                                    | 4 260             |           | 4          |
| MMAE-TCO                                                    | 6 780             |           | 5          |
| MMAE-TCO                                                    | 9 260             |           | 6          |
| MMAE-TCO                                                    | 5 170             |           | 7          |
| MMAE-TCO                                                    | 6 950             |           | 8          |
| MMAE-TCO                                                    | 9 640             |           | 9          |
| MMAE-TCO                                                    | 9 190             |           | 10         |
| MMAE-TCO                                                    | 12 000            |           | 11         |
| MMAE-TCO                                                    | 13 700            |           | 12         |

**Table S4:** Individual data points and summary statistics used to create Fig. 4A(i). Bold rows show mean  $IC_{50} \pm SEM$  in  $\mu M$  calculated from all independent experiments listed below each condition.

| Condition                                                     | $IC_{50}$ / $\mu M$                         | Experiment |
|---------------------------------------------------------------|---------------------------------------------|------------|
| <b>Pre-targeting 1 <math>\mu M</math>/1h Afa-Tz + Dox-TCO</b> | <b>5 800 000 <math>\pm</math> 1 300 000</b> |            |
| Pre-targeting 1 $\mu M$ /1h Afa-Tz + Dox-TCO                  | 7 040 000                                   | 1          |
| Pre-targeting 1 $\mu M$ /1h Afa-Tz + Dox-TCO                  | 7 210 000                                   | 2          |
| Pre-targeting 1 $\mu M$ /1h Afa-Tz + Dox-TCO                  | 3 090 000                                   | 3          |
| <b>Pre-targeting 1 <math>\mu M</math>/6h Afa-Tz + Dox-TCO</b> | <b>4 100 000 <math>\pm</math> 1 000 000</b> |            |
| Pre-targeting 1 $\mu M$ /6h Afa-Tz + Dox-TCO                  | 7 140 000                                   | 1          |
| Pre-targeting 1 $\mu M$ /6h Afa-Tz + Dox-TCO                  | 3 570 000                                   | 2          |
| Pre-targeting 1 $\mu M$ /6h Afa-Tz + Dox-TCO                  | 2 740 000                                   | 3          |
| Pre-targeting 1 $\mu M$ /6h Afa-Tz + Dox-TCO                  | 2 920 000                                   | 4          |
| <b>Pre-targeting 5 <math>\mu M</math>/1h Afa-Tz + Dox-TCO</b> | <b>4 800 000 <math>\pm</math> 1 000 000</b> |            |
| Pre-targeting 5 $\mu M$ /1h Afa-Tz + Dox-TCO                  | 6 190 000                                   | 1          |
| Pre-targeting 5 $\mu M$ /1h Afa-Tz + Dox-TCO                  | 6 990 000                                   | 2          |
| Pre-targeting 5 $\mu M$ /1h Afa-Tz + Dox-TCO                  | 3 470 000                                   | 3          |
| Pre-targeting 5 $\mu M$ /1h Afa-Tz + Dox-TCO                  | 2 630 000                                   | 4          |
| <b>Pre-targeting 5 <math>\mu M</math>/6h Afa-Tz + Dox-TCO</b> | <b>3 600 000 <math>\pm</math> 800 000</b>   |            |
| Pre-targeting 5 $\mu M$ /6h Afa-Tz + Dox-TCO                  | 2 640 000                                   | 1          |
| Pre-targeting 5 $\mu M$ /6h Afa-Tz + Dox-TCO                  | 6 640 000                                   | 2          |
| Pre-targeting 5 $\mu M$ /6h Afa-Tz + Dox-TCO                  | 3 260 000                                   | 3          |
| Pre-targeting 5 $\mu M$ /6h Afa-Tz + Dox-TCO                  | 2 460 000                                   | 4          |
| Pre-targeting 5 $\mu M$ /6h Afa-Tz + Dox-TCO                  | 2 860 000                                   | 5          |

**Table S5:** Individual data points and summary statistics used to create Fig. 4A(ii). Bold rows show mean  $IC_{50} \pm SEM$  in  $\mu M$  calculated from all independent experiments listed below each condition.

| Condition                                                        | $IC_{50}$ / $\mu M$                 | Experiment |
|------------------------------------------------------------------|-------------------------------------|------------|
| <b>Pre-targeting 0.2 <math>\mu M</math>/1h Afa-Tz + MMAE-TCO</b> | <b>6 700 <math>\pm</math> 1 500</b> |            |
| Pre-targeting 0.2 $\mu M$ /1h Afa-Tz + MMAE-TCO                  | 9 400                               | 1          |
| Pre-targeting 0.2 $\mu M$ /1h Afa-Tz + MMAE-TCO                  | 6 340                               | 2          |
| Pre-targeting 0.2 $\mu M$ /1h Afa-Tz + MMAE-TCO                  | 4 380                               | 3          |
| <b>Pre-targeting 0.2 <math>\mu M</math>/3h Afa-Tz + MMAE-TCO</b> | <b>2 400 <math>\pm</math> 400</b>   |            |
| Pre-targeting 0.2 $\mu M$ /3h Afa-Tz + MMAE-TCO                  | 2 750                               | 1          |
| Pre-targeting 0.2 $\mu M$ /3h Afa-Tz + MMAE-TCO                  | 1 720                               | 2          |
| Pre-targeting 0.2 $\mu M$ /3h Afa-Tz + MMAE-TCO                  | 1 720                               | 3          |
| Pre-targeting 0.2 $\mu M$ /3h Afa-Tz + MMAE-TCO                  | 3 220                               | 4          |
| <b>Pre-targeting 0.2 <math>\mu M</math>/6h Afa-Tz + MMAE-TCO</b> | <b>1 600 <math>\pm</math> 200</b>   |            |
| Pre-targeting 0.2 $\mu M$ /6h Afa-Tz + MMAE-TCO                  | 2 090                               | 1          |
| Pre-targeting 0.2 $\mu M$ /6h Afa-Tz + MMAE-TCO                  | 1 340                               | 2          |
| Pre-targeting 0.2 $\mu M$ /6h Afa-Tz + MMAE-TCO                  | 1 340                               | 3          |
| <b>Pre-targeting 1 <math>\mu M</math>/1h Afa-Tz + MMAE-TCO</b>   | <b>4 000 <math>\pm</math> 1 000</b> |            |
| Pre-targeting 1 $\mu M$ /1h Afa-Tz + MMAE-TCO                    | 3 180                               | 1          |
| Pre-targeting 1 $\mu M$ /1h Afa-Tz + MMAE-TCO                    | 1 690                               | 2          |
| Pre-targeting 1 $\mu M$ /1h Afa-Tz + MMAE-TCO                    | 4 490                               | 3          |
| Pre-targeting 1 $\mu M$ /1h Afa-Tz + MMAE-TCO                    | 6 620                               | 4          |
| <b>Pre-targeting 1 <math>\mu M</math>/3h Afa-Tz + MMAE-TCO</b>   | <b>1 300 <math>\pm</math> 300</b>   |            |
| Pre-targeting 1 $\mu M$ /3h Afa-Tz + MMAE-TCO                    | 985                                 | 1          |
| Pre-targeting 1 $\mu M$ /3h Afa-Tz + MMAE-TCO                    | 787                                 | 2          |
| Pre-targeting 1 $\mu M$ /3h Afa-Tz + MMAE-TCO                    | 787                                 | 3          |
| Pre-targeting 1 $\mu M$ /3h Afa-Tz + MMAE-TCO                    | 2 590                               | 4          |
| Pre-targeting 1 $\mu M$ /3h Afa-Tz + MMAE-TCO                    | 1 320                               | 5          |
| <b>Pre-targeting 1 <math>\mu M</math>/6h Afa-Tz + MMAE-TCO</b>   | <b>520 <math>\pm</math> 70</b>      |            |
| Pre-targeting 1 $\mu M$ /6h Afa-Tz + MMAE-TCO                    | 662                                 | 1          |
| Pre-targeting 1 $\mu M$ /6h Afa-Tz + MMAE-TCO                    | 448                                 | 2          |
| Pre-targeting 1 $\mu M$ /6h Afa-Tz + MMAE-TCO                    | 448                                 | 3          |
| <b>Pre-targeting 5 <math>\mu M</math>/1h Afa-Tz + MMAE-TCO</b>   | <b>1 000 <math>\pm</math> 300</b>   |            |
| Pre-targeting 5 $\mu M$ /1h Afa-Tz + MMAE-TCO                    | 885                                 | 1          |
| Pre-targeting 5 $\mu M$ /1h Afa-Tz + MMAE-TCO                    | 478                                 | 2          |
| Pre-targeting 5 $\mu M$ /1h Afa-Tz + MMAE-TCO                    | 692                                 | 3          |
| Pre-targeting 5 $\mu M$ /1h Afa-Tz + MMAE-TCO                    | 724                                 | 4          |
| Pre-targeting 5 $\mu M$ /1h Afa-Tz + MMAE-TCO                    | 2 170                               | 5          |
| <b>Pre-targeting 5 <math>\mu M</math>/3h Afa-Tz + MMAE-TCO</b>   | <b>820 <math>\pm</math> 90</b>      |            |
| Pre-targeting 5 $\mu M$ /3h Afa-Tz + MMAE-TCO                    | 768                                 | 1          |
| Pre-targeting 5 $\mu M$ /3h Afa-Tz + MMAE-TCO                    | 1 090                               | 2          |
| Pre-targeting 5 $\mu M$ /3h Afa-Tz + MMAE-TCO                    | 748                                 | 3          |
| Pre-targeting 5 $\mu M$ /3h Afa-Tz + MMAE-TCO                    | 670                                 | 4          |
| <b>Pre-targeting 5 <math>\mu M</math>/6h Afa-Tz + MMAE-TCO</b>   | <b>280 <math>\pm</math> 50</b>      |            |
| Pre-targeting 5 $\mu M$ /6h Afa-Tz + MMAE-TCO                    | 318                                 | 1          |
| Pre-targeting 5 $\mu M$ /6h Afa-Tz + MMAE-TCO                    | 179                                 | 2          |
| Pre-targeting 5 $\mu M$ /6h Afa-Tz + MMAE-TCO                    | 355                                 | 3          |

**Table S6:** Individual data points and summary statistics used to create Fig. 4B and Fig. S3. Bold rows show mean  $IC_{50} \pm SEM$  in  $\mu M$  calculated from all independent experiments listed below each condition.

| <b>Condition</b>                                               | <b><math>IC_{50}</math> / <math>\mu M</math></b> | <b>Experiment</b> |
|----------------------------------------------------------------|--------------------------------------------------|-------------------|
| <b>Co-incubation 1 <math>\mu M</math> Ara-Tz + MMAE-TCO</b>    | 420 $\pm$ 100                                    |                   |
| Co-incubation 1 $\mu M$ Ara-Tz + MMAE-TCO                      | 553                                              | 1                 |
| Co-incubation 1 $\mu M$ Ara-Tz + MMAE-TCO                      | 478                                              | 2                 |
| Co-incubation 1 $\mu M$ Ara-Tz + MMAE-TCO                      | 220                                              | 3                 |
| <b>Co-incubation 5 <math>\mu M</math> Ara-Tz + MMAE-TCO</b>    | 350 $\pm$ 40                                     |                   |
| Co-incubation 5 $\mu M$ Ara-Tz + MMAE-TCO                      | 385                                              | 1                 |
| Co-incubation 5 $\mu M$ Ara-Tz + MMAE-TCO                      | 261                                              | 2                 |
| Co-incubation 5 $\mu M$ Ara-Tz + MMAE-TCO                      | 315                                              | 3                 |
| Co-incubation 5 $\mu M$ Ara-Tz + MMAE-TCO                      | 524                                              | 4                 |
| Co-incubation 5 $\mu M$ Ara-Tz + MMAE-TCO                      | 222                                              | 5                 |
| Co-incubation 5 $\mu M$ Ara-Tz + MMAE-TCO                      | 432                                              | 6                 |
| Co-incubation 5 $\mu M$ Ara-Tz + MMAE-TCO                      | 315                                              | 7                 |
| <b>Pre-targeting 1 <math>\mu M</math>/1h Ara-Tz + MMAE-TCO</b> | 7 000 $\pm$ 2 000                                |                   |
| Pre-targeting 1 $\mu M$ /1h Ara-Tz + MMAE-TCO                  | 6 280                                            | 1                 |
| Pre-targeting 1 $\mu M$ /1h Ara-Tz + MMAE-TCO                  | 3 180                                            | 2                 |
| Pre-targeting 1 $\mu M$ /1h Ara-Tz + MMAE-TCO                  | 10 900                                           | 3                 |
| <b>Pre-targeting 5 <math>\mu M</math>/1h Ara-Tz + MMAE-TCO</b> | 3 000 $\pm$ 700                                  |                   |
| Pre-targeting 5 $\mu M$ /1h Ara-Tz + MMAE-TCO                  | 5 190                                            | 1                 |
| Pre-targeting 5 $\mu M$ /1h Ara-Tz + MMAE-TCO                  | 2 030                                            | 2                 |
| Pre-targeting 5 $\mu M$ /1h Ara-Tz + MMAE-TCO                  | 2 240                                            | 3                 |
| Pre-targeting 5 $\mu M$ /1h Ara-Tz + MMAE-TCO                  | 2 520                                            | 4                 |
| <b>Pre-targeting 5 <math>\mu M</math>/6h Ara-Tz + MMAE-TCO</b> | 3 940 $\pm$ 60                                   |                   |
| Pre-targeting 5 $\mu M$ /6h Ara-Tz + MMAE-TCO                  | 3 900                                            | 1                 |
| Pre-targeting 5 $\mu M$ /6h Ara-Tz + MMAE-TCO                  | 3 870                                            | 2                 |
| Pre-targeting 5 $\mu M$ /6h Ara-Tz + MMAE-TCO                  | 4 050                                            | 3                 |



**Table S7:** Individual data points and summary statistics used to create Fig. 5C, Fig. S2, and Fig. S4. Bold rows show mean  $IC_{50} \pm SEM$  in  $\mu M$  calculated from all independent experiments listed below each condition.

| Condition                                                            | $IC_{50}$ / $\mu M$                          | Experiment |
|----------------------------------------------------------------------|----------------------------------------------|------------|
| <b>A431, MMAE</b>                                                    | <b>73 <math>\pm</math> 10</b>                |            |
| A431, MMAE                                                           | 90.8                                         | 1          |
| A431, MMAE                                                           | 69.2                                         | 2          |
| A431, MMAE                                                           | 99.5                                         | 3          |
| A431, MMAE                                                           | 44.3                                         | 4          |
| A431, MMAE                                                           | 53.8                                         | 5          |
| A431, MMAE                                                           | 54.6                                         | 6          |
| A431, MMAE                                                           | 49.4                                         | 7          |
| A431, MMAE                                                           | 60.7                                         | 8          |
| A431, MMAE                                                           | 136                                          | 9          |
| <b>A431, MMAE-TCO</b>                                                | <b>8 100 <math>\pm</math> 800</b>            |            |
| A431, MMAE-TCO                                                       | 5 650                                        | 1          |
| A431, MMAE-TCO                                                       | 6 930                                        | 2          |
| A431, MMAE-TCO                                                       | 7 590                                        | 3          |
| A431, MMAE-TCO                                                       | 4 260                                        | 4          |
| A431, MMAE-TCO                                                       | 6 780                                        | 5          |
| A431, MMAE-TCO                                                       | 5 170                                        | 6          |
| A431, MMAE-TCO                                                       | 9 260                                        | 7          |
| A431, MMAE-TCO                                                       | 6 950                                        | 8          |
| A431, MMAE-TCO                                                       | 9 640                                        | 9          |
| A431, MMAE-TCO                                                       | 9 190                                        | 10         |
| A431, MMAE-TCO                                                       | 12 000                                       | 11         |
| A431, MMAE-TCO                                                       | 13 700                                       | 12         |
| <b>A431, Co-incubation 5 <math>\mu M</math> Afa-Tz + MMAE-TCO</b>    | <b>240 <math>\pm</math> 30</b>               |            |
| A431, Co-incubation 5 $\mu M$ Afa-Tz + MMAE-TCO                      | 262                                          | 1          |
| A431, Co-incubation 5 $\mu M$ Afa-Tz + MMAE-TCO                      | 208                                          | 2          |
| A431, Co-incubation 5 $\mu M$ Afa-Tz + MMAE-TCO                      | 136                                          | 3          |
| A431, Co-incubation 5 $\mu M$ Afa-Tz + MMAE-TCO                      | 213                                          | 4          |
| A431, Co-incubation 5 $\mu M$ Afa-Tz + MMAE-TCO                      | 140                                          | 5          |
| A431, Co-incubation 5 $\mu M$ Afa-Tz + MMAE-TCO                      | 149                                          | 6          |
| A431, Co-incubation 5 $\mu M$ Afa-Tz + MMAE-TCO                      | 234                                          | 7          |
| A431, Co-incubation 5 $\mu M$ Afa-Tz + MMAE-TCO                      | 352                                          | 8          |
| A431, Co-incubation 5 $\mu M$ Afa-Tz + MMAE-TCO                      | 445                                          | 9          |
| <b>A431, Pre-targeting 5 <math>\mu M</math>/1h Afa-Tz + MMAE-TCO</b> | <b>1 000 <math>\pm</math> 300</b>            |            |
| A431, Pre-targeting 5 $\mu M$ /1h Afa-Tz + MMAE-TCO                  | 885                                          | 1          |
| A431, Pre-targeting 5 $\mu M$ /1h Afa-Tz + MMAE-TCO                  | 478                                          | 2          |
| A431, Pre-targeting 5 $\mu M$ /1h Afa-Tz + MMAE-TCO                  | 692                                          | 3          |
| A431, Pre-targeting 5 $\mu M$ /1h Afa-Tz + MMAE-TCO                  | 724                                          | 4          |
| A431, Pre-targeting 5 $\mu M$ /1h Afa-Tz + MMAE-TCO                  | 2 170                                        | 5          |
| <b>A431, Afatinib</b>                                                | <b>4 700 000 <math>\pm</math> 1 100 000</b>  |            |
| A431, Afatinib                                                       | 10 400 000                                   | 1          |
| A431, Afatinib                                                       | 6 580 000                                    | 2          |
| A431, Afatinib                                                       | 4 430 000                                    | 3          |
| A431, Afatinib                                                       | 1 660 000                                    | 4          |
| A431, Afatinib                                                       | 2 760 000                                    | 5          |
| A431, Afatinib                                                       | 3 720 000                                    | 6          |
| A431, Afatinib                                                       | 3 490 000                                    | 7          |
| <b>A431, Afa-Tz</b>                                                  | <b>25 000 000 <math>\pm</math> 9 000 000</b> |            |
| A431, Afa-Tz                                                         | 9 650 000                                    | 1          |
| A431, Afa-Tz                                                         | 27 200 000                                   | 2          |
| A431, Afa-Tz                                                         | 50 000 000                                   | 3          |
| A431, Afa-Tz                                                         | 15 100 000                                   | 4          |

continued on next page

Table S.7 (continued)

| Condition                                                  | IC <sub>50</sub> / pM | Experiment |
|------------------------------------------------------------|-----------------------|------------|
| continued from last page                                   |                       |            |
| <b>MDA-MB-468, MMAE</b>                                    | 143                   |            |
| MDA-MB-468, MMAE                                           | 122                   | 1          |
| MDA-MB-468, MMAE                                           | 149                   | 2          |
| MDA-MB-468, MMAE                                           | 157                   | 3          |
| <b>MDA-MB-468, MMAE-TCO</b>                                | 16 500                |            |
| MDA-MB-468, MMAE-TCO                                       | 16 300                | 1          |
| MDA-MB-468, MMAE-TCO                                       | 15 200                | 2          |
| MDA-MB-468, MMAE-TCO                                       | 18 000                | 3          |
| <b>MDA-MB-468, Co-incubation 5 µM Afa-Tz + MMAE-TCO</b>    | 890                   |            |
| MDA-MB-468, Co-incubation 5 µM Afa-Tz + MMAE-TCO           | 1 190                 | 1          |
| MDA-MB-468, Co-incubation 5 µM Afa-Tz + MMAE-TCO           | 800                   | 2          |
| MDA-MB-468, Co-incubation 5 µM Afa-Tz + MMAE-TCO           | 714                   | 3          |
| MDA-MB-468, Co-incubation 5 µM Afa-Tz + MMAE-TCO           | 871                   | 4          |
| <b>MDA-MB-468, Pre-targeting 5 µM/1h Afa-Tz + MMAE-TCO</b> | 2 200                 |            |
| MDA-MB-468, Pre-targeting 5 µM/1h Afa-Tz + MMAE-TCO        | 3 130                 | 1          |
| MDA-MB-468, Pre-targeting 5 µM/1h Afa-Tz + MMAE-TCO        | 1 530                 | 2          |
| MDA-MB-468, Pre-targeting 5 µM/1h Afa-Tz + MMAE-TCO        | 1 950                 | 3          |
| <b>MDA-MB-468, Afatinib</b>                                | 2 000 000             |            |
| MDA-MB-468, Afatinib                                       | 1 230 000             | 1          |
| MDA-MB-468, Afatinib                                       | 2 330 000             | 2          |
| MDA-MB-468, Afatinib                                       | 2 290 000             | 3          |
| <b>MDA-MB-468, Afa-Tz</b>                                  | 7 400 000             |            |
| MDA-MB-468, Afa-Tz                                         | 6 470 000             | 1          |
| MDA-MB-468, Afa-Tz                                         | 5 240 000             | 2          |
| MDA-MB-468, Afa-Tz                                         | 10 600 000            | 3          |

continued on next page

Table S7 (continued)

| Condition                                                            | IC <sub>50</sub> / $\mu$ M |                 | Experiment |
|----------------------------------------------------------------------|----------------------------|-----------------|------------|
| <b>MCF-7, MMAE</b>                                                   | 160                        | $\pm$ 30        |            |
| MCF-7, MMAE                                                          | 111                        |                 | 1          |
| MCF-7, MMAE                                                          | 130                        |                 | 2          |
| MCF-7, MMAE                                                          | 318                        |                 | 3          |
| MCF-7, MMAE                                                          | 146                        |                 | 4          |
| MCF-7, MMAE                                                          | 98.6                       |                 | 5          |
| MCF-7, MMAE                                                          | 136                        |                 | 6          |
| <b>MCF-7, MMAE-TCO</b>                                               | 7 900                      | $\pm$ 800       |            |
| MCF-7, MMAE-TCO                                                      | 6 780                      |                 | 1          |
| MCF-7, MMAE-TCO                                                      | 5 920                      |                 | 2          |
| MCF-7, MMAE-TCO                                                      | 9 880                      |                 | 3          |
| MCF-7, MMAE-TCO                                                      | 7 510                      |                 | 4          |
| MCF-7, MMAE-TCO                                                      | 9 620                      |                 | 5          |
| <b>MCF-7, Co-incubation 5 <math>\mu</math>M Afa-Tz + MMAE-TCO</b>    | 830                        | $\pm$ 80        |            |
| MCF-7, Co-incubation 5 $\mu$ M Afa-Tz + MMAE-TCO                     | 894                        |                 | 1          |
| MCF-7, Co-incubation 5 $\mu$ M Afa-Tz + MMAE-TCO                     | 869                        |                 | 2          |
| MCF-7, Co-incubation 5 $\mu$ M Afa-Tz + MMAE-TCO                     | 524                        |                 | 3          |
| MCF-7, Co-incubation 5 $\mu$ M Afa-Tz + MMAE-TCO                     | 1 140                      |                 | 4          |
| MCF-7, Co-incubation 5 $\mu$ M Afa-Tz + MMAE-TCO                     | 606                        |                 | 5          |
| MCF-7, Co-incubation 5 $\mu$ M Afa-Tz + MMAE-TCO                     | 790                        |                 | 6          |
| MCF-7, Co-incubation 5 $\mu$ M Afa-Tz + MMAE-TCO                     | 978                        |                 | 7          |
| <b>MCF-7, Pre-targeting 5 <math>\mu</math>M/1h Afa-Tz + MMAE-TCO</b> | 3 000                      | $\pm$ 500       |            |
| MCF-7, Pre-targeting 5 $\mu$ M/1h Afa-Tz + MMAE-TCO                  | 3 950                      |                 | 1          |
| MCF-7, Pre-targeting 5 $\mu$ M/1h Afa-Tz + MMAE-TCO                  | 1 760                      |                 | 2          |
| MCF-7, Pre-targeting 5 $\mu$ M/1h Afa-Tz + MMAE-TCO                  | 3 500                      |                 | 3          |
| MCF-7, Pre-targeting 5 $\mu$ M/1h Afa-Tz + MMAE-TCO                  | 2 670                      |                 | 4          |
| <b>MCF-7, Afatinib</b>                                               | 7 600 000                  | $\pm$ 1 600 000 |            |
| MCF-7, Afatinib                                                      | 7 560 000                  |                 | 1          |
| MCF-7, Afatinib                                                      | 10 300 000                 |                 | 2          |
| MCF-7, Afatinib                                                      | 4 810 000                  |                 | 3          |
| <b>MCF-7, Afa-Tz</b>                                                 | 44 000 000                 | $\pm$ 8 000 000 |            |
| MCF-7, Afa-Tz                                                        | 53 400 000                 |                 | 1          |
| MCF-7, Afa-Tz                                                        | 29 200 000                 |                 | 2          |
| MCF-7, Afa-Tz                                                        | 50 000 000                 |                 | 3          |

continued on next page

Table S7 (continued)

| Condition                                      | IC <sub>50</sub> / pM |             | Experiment |
|------------------------------------------------|-----------------------|-------------|------------|
| continued from last page                       |                       |             |            |
| SW620, MMAE                                    | 105                   | ± 7         |            |
| SW620, MMAE                                    | 98.6                  |             | 1          |
| SW620, MMAE                                    | 115                   |             | 2          |
| SW620, MMAE                                    | 77.6                  |             | 3          |
| SW620, MMAE                                    | 128                   |             | 4          |
| SW620, MMAE                                    | 99.9                  |             | 5          |
| SW620, MMAE                                    | 109                   |             | 6          |
| SW620, MMAE-TCO                                | 10 300                | ± 700       |            |
| SW620, MMAE-TCO                                | 7 980                 |             | 1          |
| SW620, MMAE-TCO                                | 10 700                |             | 2          |
| SW620, MMAE-TCO                                | 8 630                 |             | 3          |
| SW620, MMAE-TCO                                | 11 400                |             | 4          |
| SW620, MMAE-TCO                                | 11 300                |             | 5          |
| SW620, MMAE-TCO                                | 12 000                |             | 6          |
| SW620, Co-incubation 5 μM Afa-Tz + MMAE-TCO    | 520                   | ± 70        |            |
| SW620, Co-incubation 5 μM Afa-Tz + MMAE-TCO    | 299                   |             | 1          |
| SW620, Co-incubation 5 μM Afa-Tz + MMAE-TCO    | 400                   |             | 2          |
| SW620, Co-incubation 5 μM Afa-Tz + MMAE-TCO    | 387                   |             | 3          |
| SW620, Co-incubation 5 μM Afa-Tz + MMAE-TCO    | 661                   |             | 4          |
| SW620, Co-incubation 5 μM Afa-Tz + MMAE-TCO    | 724                   |             | 5          |
| SW620, Co-incubation 5 μM Afa-Tz + MMAE-TCO    | 674                   |             | 6          |
| SW620, Pre-targeting 5 μM/1h Afa-Tz + MMAE-TCO | 2 500                 | ± 500       |            |
| SW620, Pre-targeting 5 μM/1h Afa-Tz + MMAE-TCO | 4 350                 |             | 1          |
| SW620, Pre-targeting 5 μM/1h Afa-Tz + MMAE-TCO | 2 120                 |             | 2          |
| SW620, Pre-targeting 5 μM/1h Afa-Tz + MMAE-TCO | 1 510                 |             | 3          |
| SW620, Pre-targeting 5 μM/1h Afa-Tz + MMAE-TCO | 2 140                 |             | 4          |
| SW620, Pre-targeting 5 μM/1h Afa-Tz + MMAE-TCO | 2 260                 |             | 5          |
| SW620, Afatinib                                | 3 700 000             | ± 900 000   |            |
| SW620, Afatinib                                | 3 890 000             |             | 1          |
| SW620, Afatinib                                | 7 170 000             |             | 2          |
| SW620, Afatinib                                | 5 480 000             |             | 3          |
| SW620, Afatinib                                | 1 460 000             |             | 4          |
| SW620, Afatinib                                | 2 040 000             |             | 5          |
| SW620, Afatinib                                | 2 260 000             |             | 6          |
| SW620, Afa-Tz                                  | 30 000 000            | ± 8 000 000 |            |
| SW620, Afa-Tz                                  | 20 300 000            |             | 1          |
| SW620, Afa-Tz                                  | 29 900 000            |             | 2          |
| SW620, Afa-Tz                                  | 27 100 000            |             | 3          |
| SW620, Afa-Tz                                  | 11 800 000            |             | 4          |
| SW620, Afa-Tz                                  | 18 500 000            |             | 5          |
| SW620, Afa-Tz                                  | 69 600 000            |             | 6          |

## 10 NMR Spectra

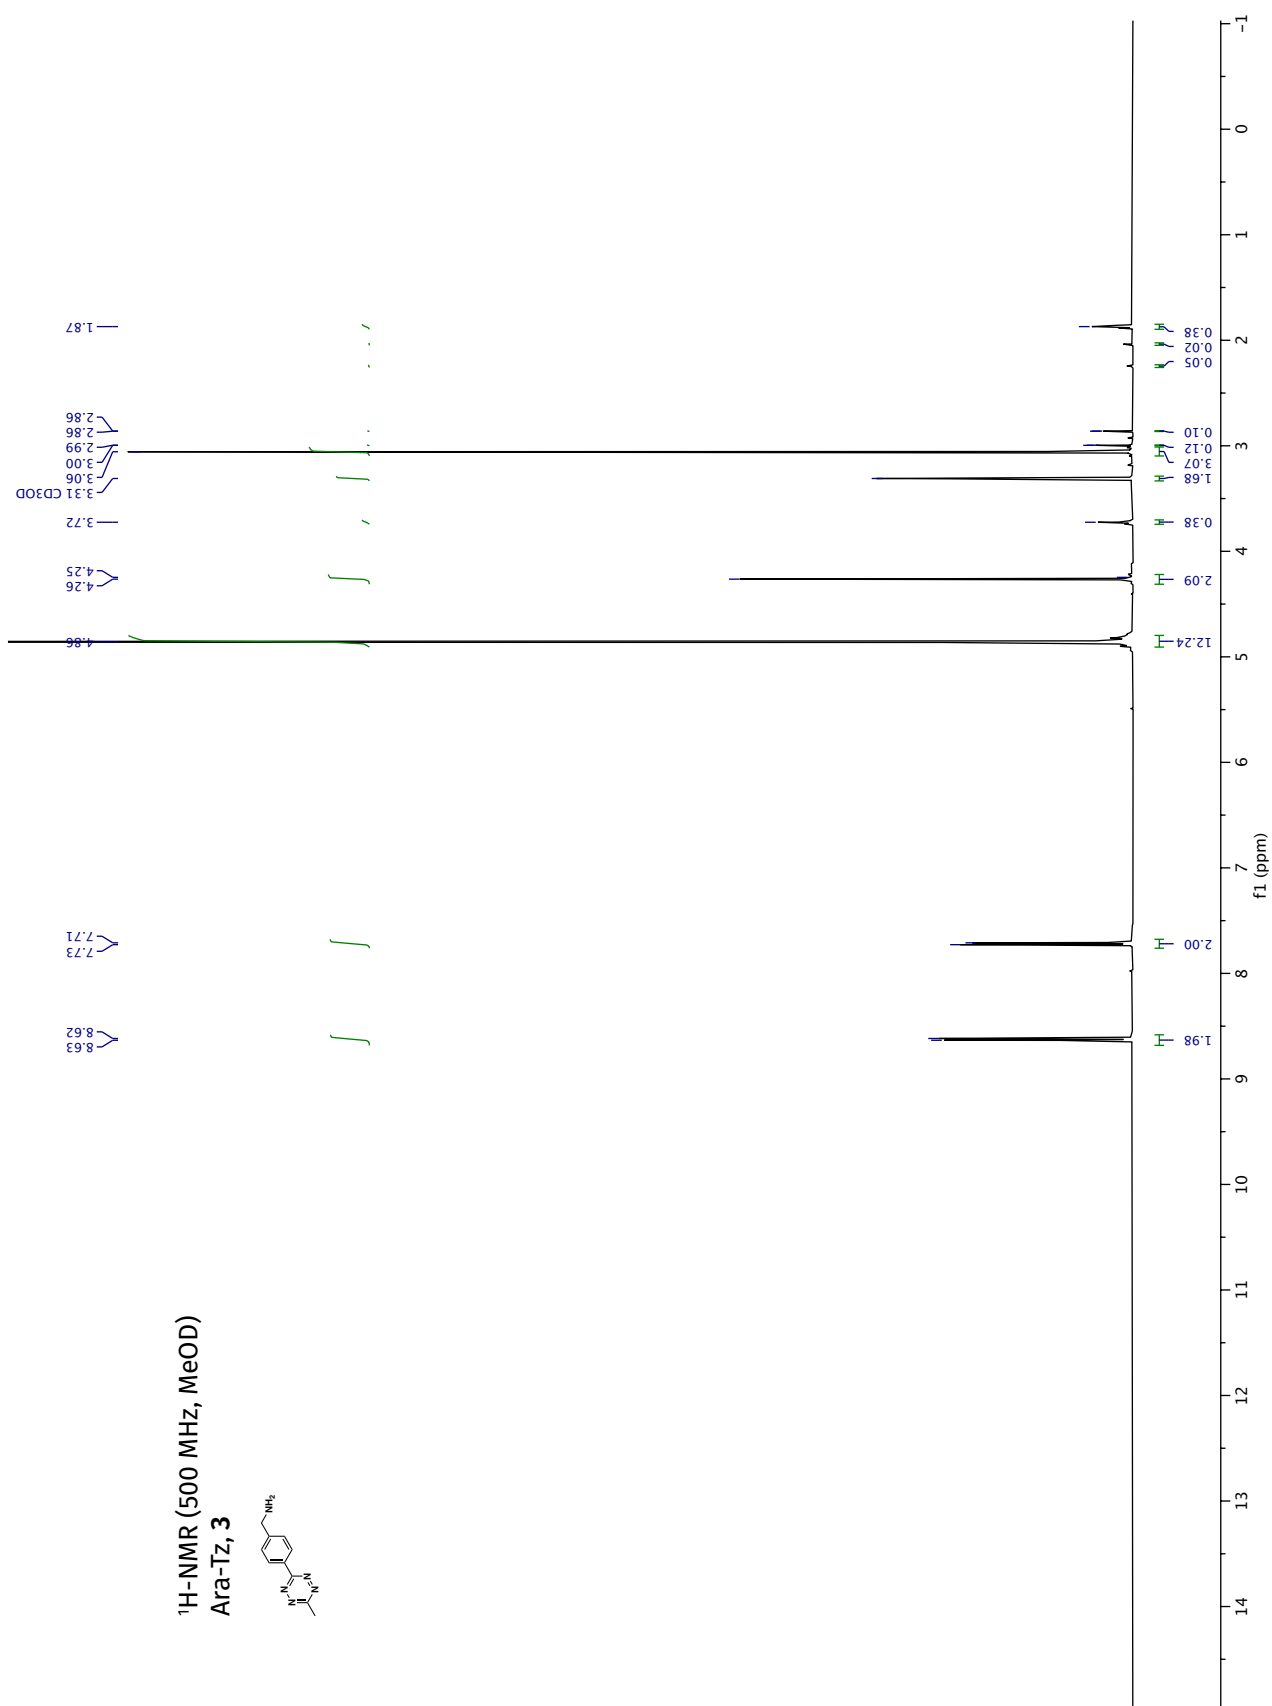

Figure S9: <sup>1</sup>H-NMR of compound **3** (Ara-Tz).

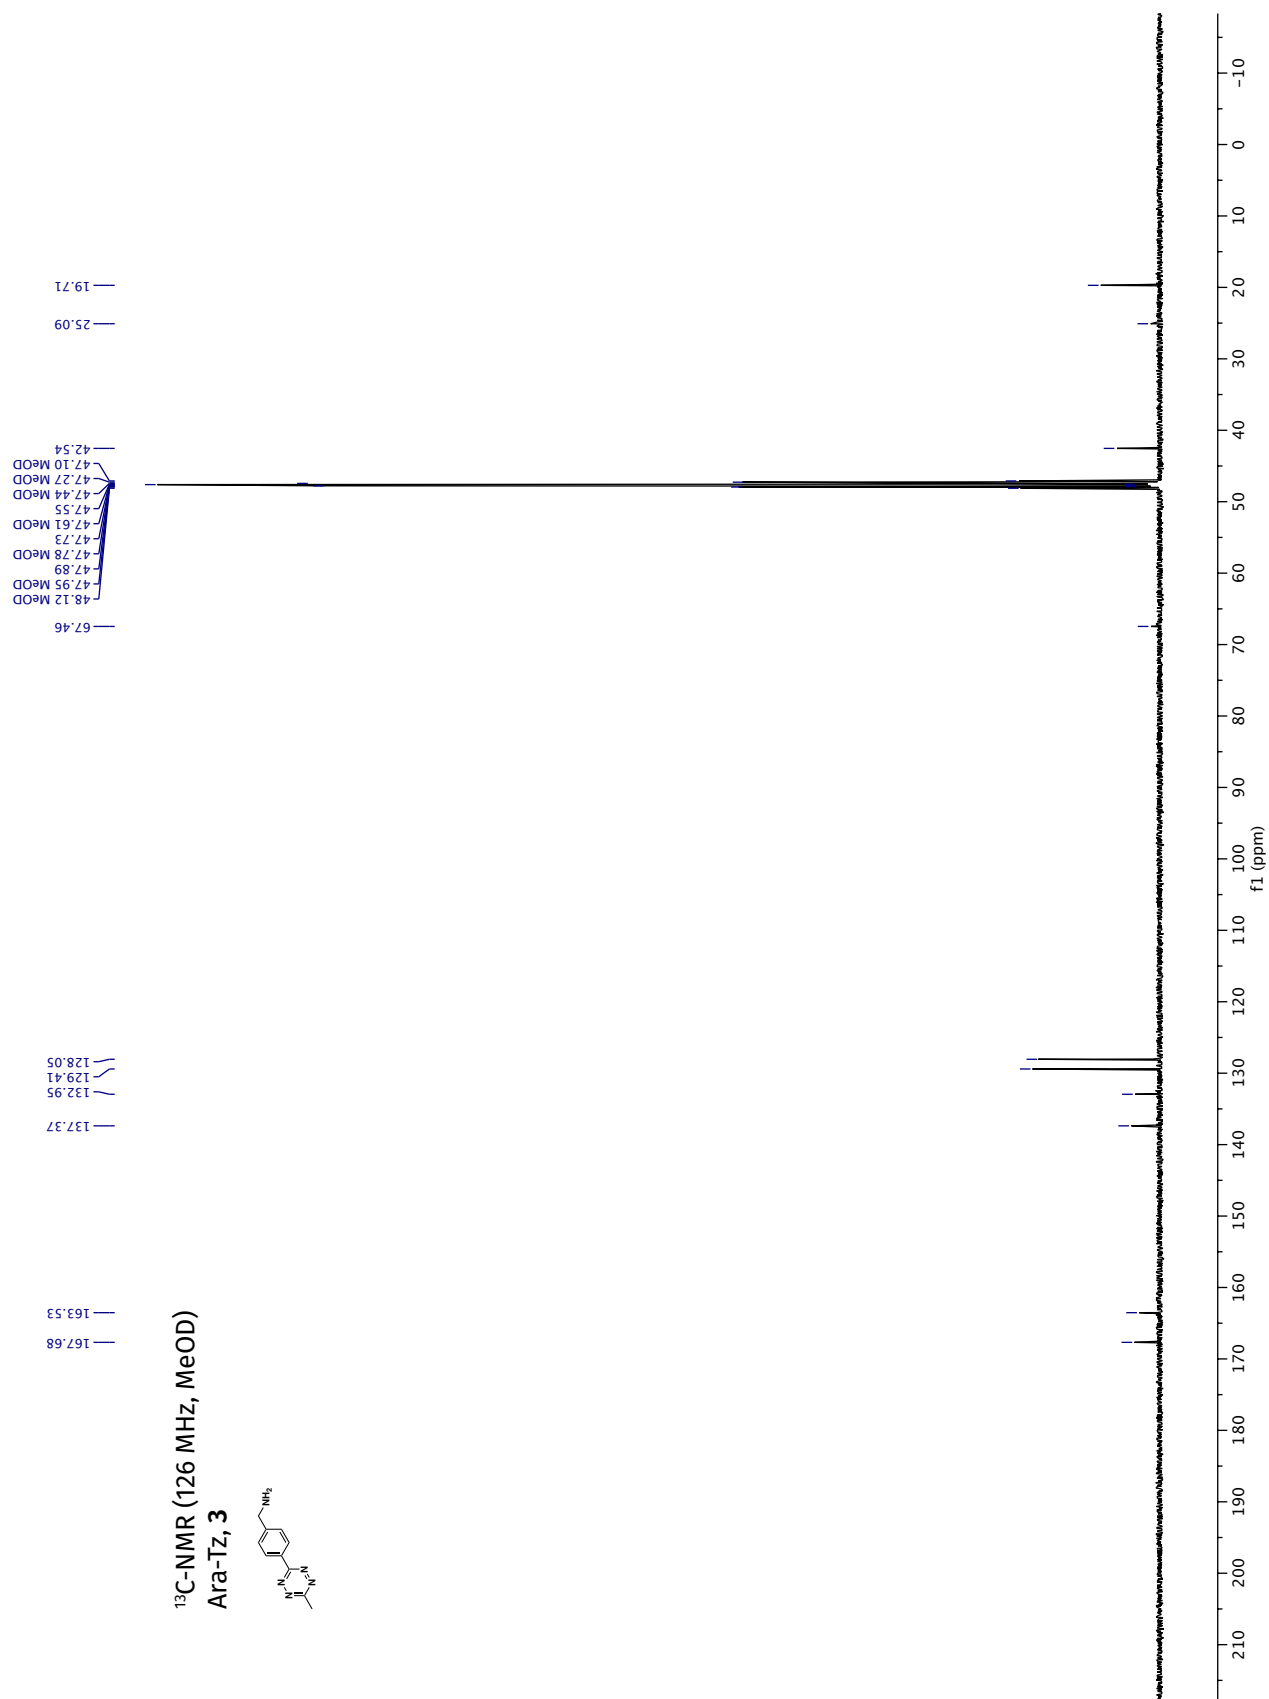

Figure S10: <sup>13</sup>C-NMR of compound **3** (Ara-Tz).

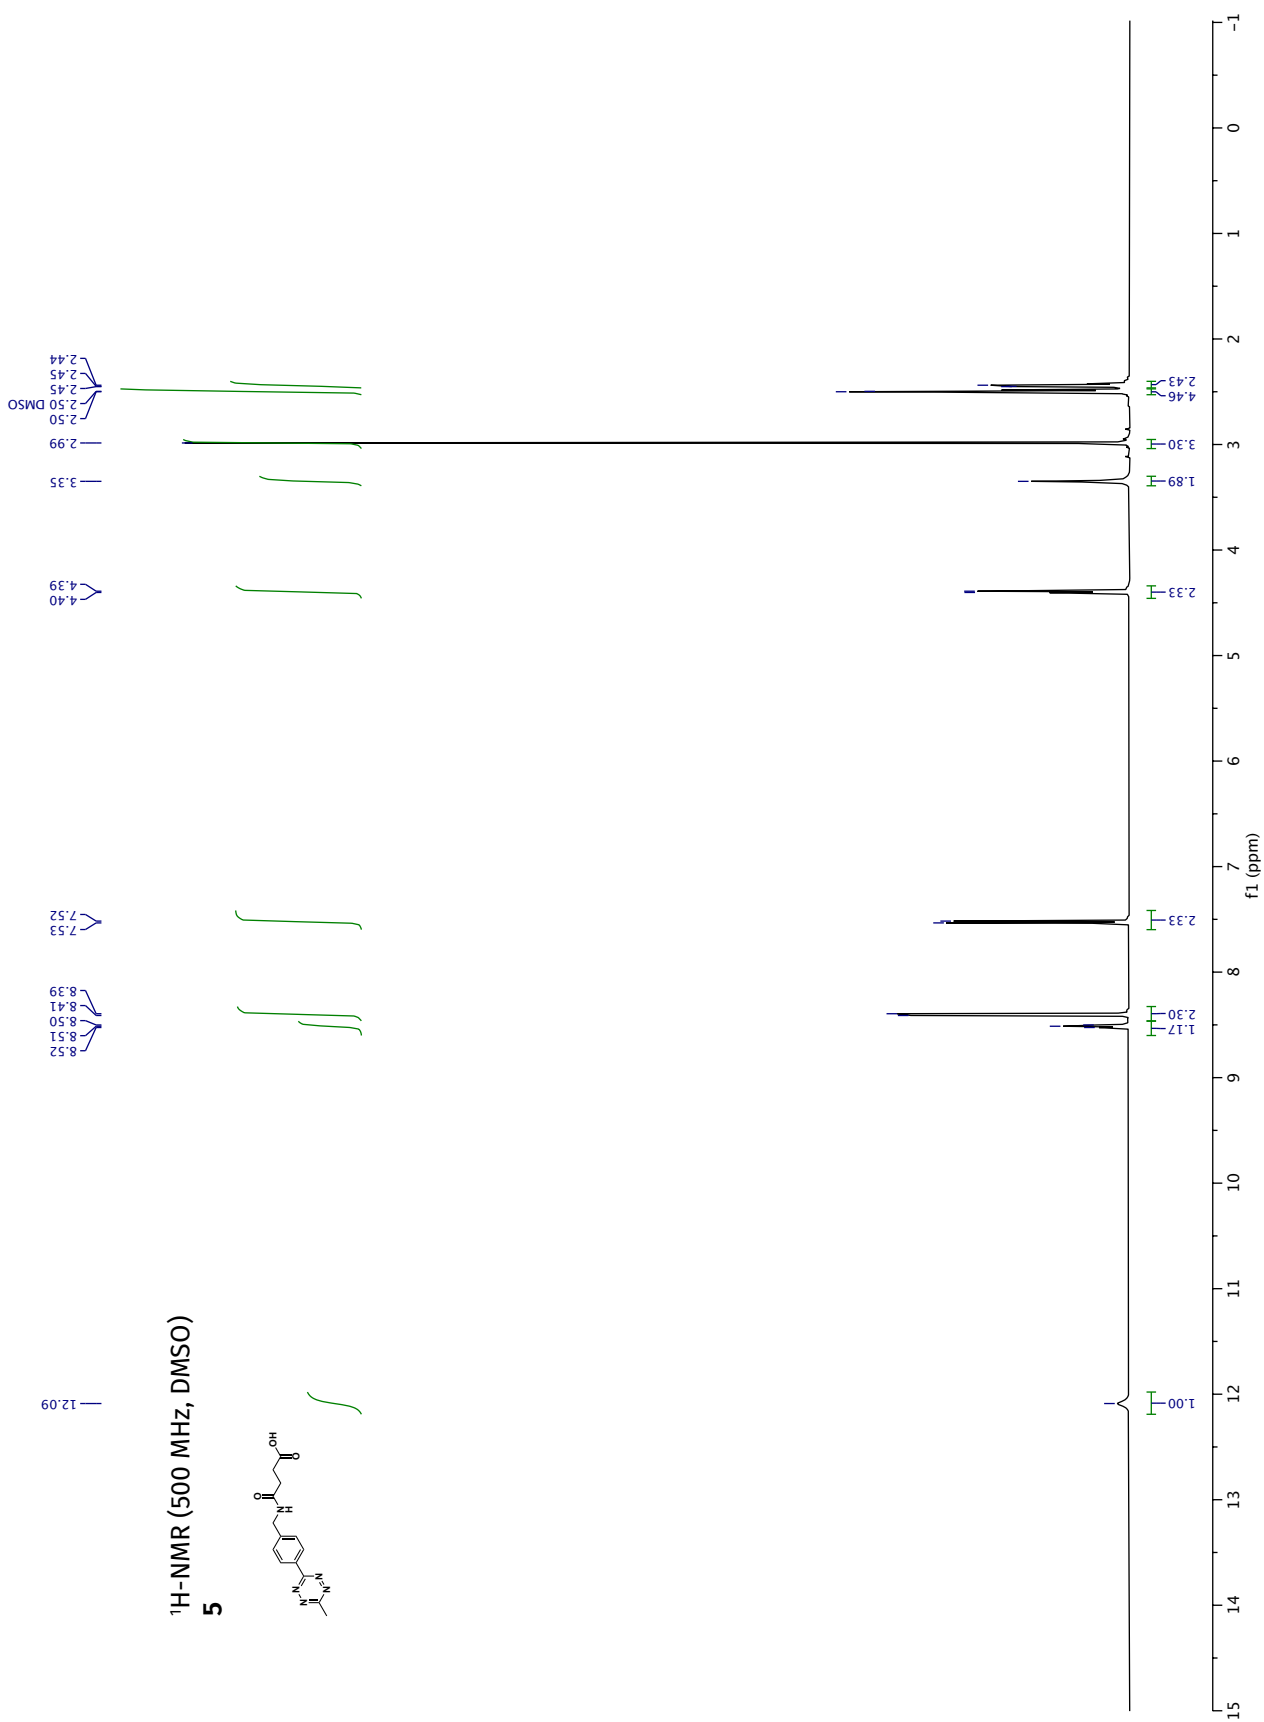

Figure S11: <sup>1</sup>H-NMR of compound 5.



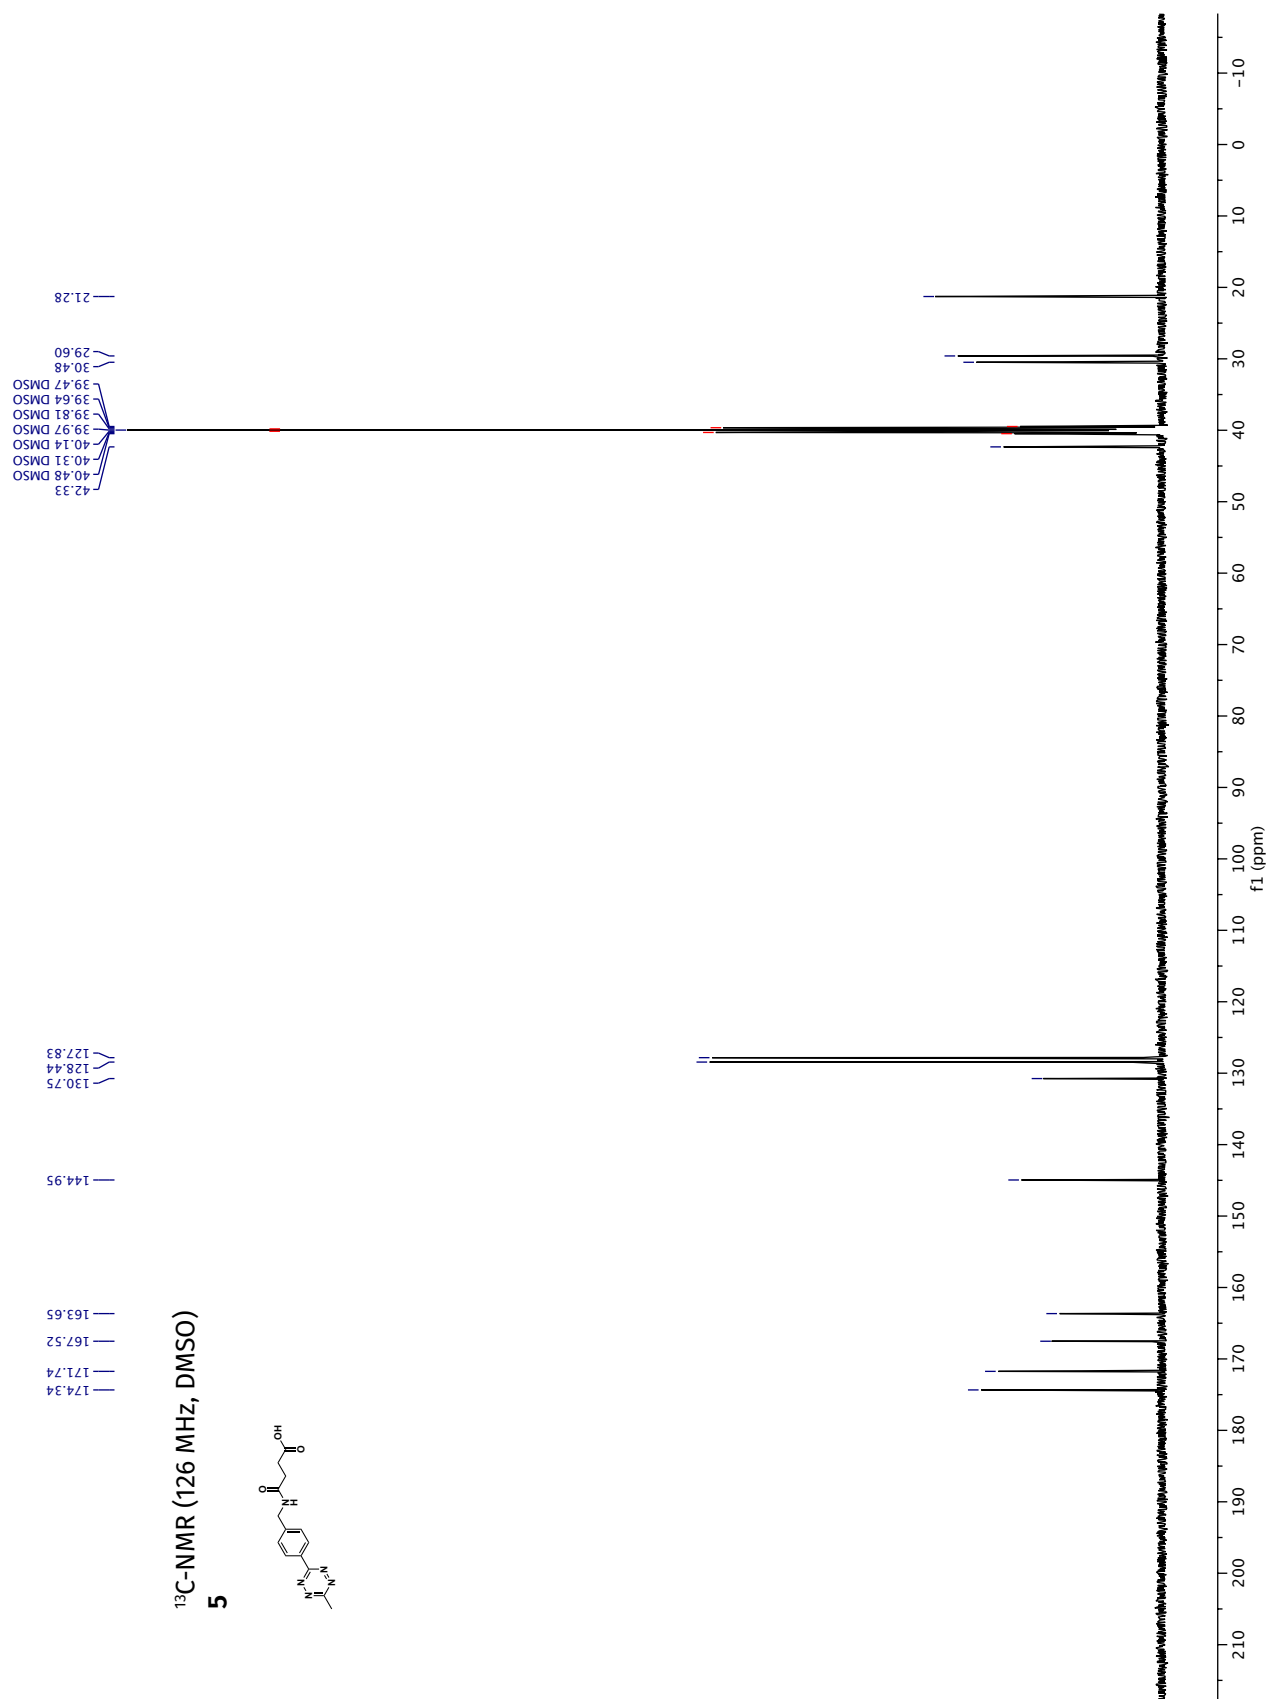

Figure S12: <sup>13</sup>C-NMR of compound 5.

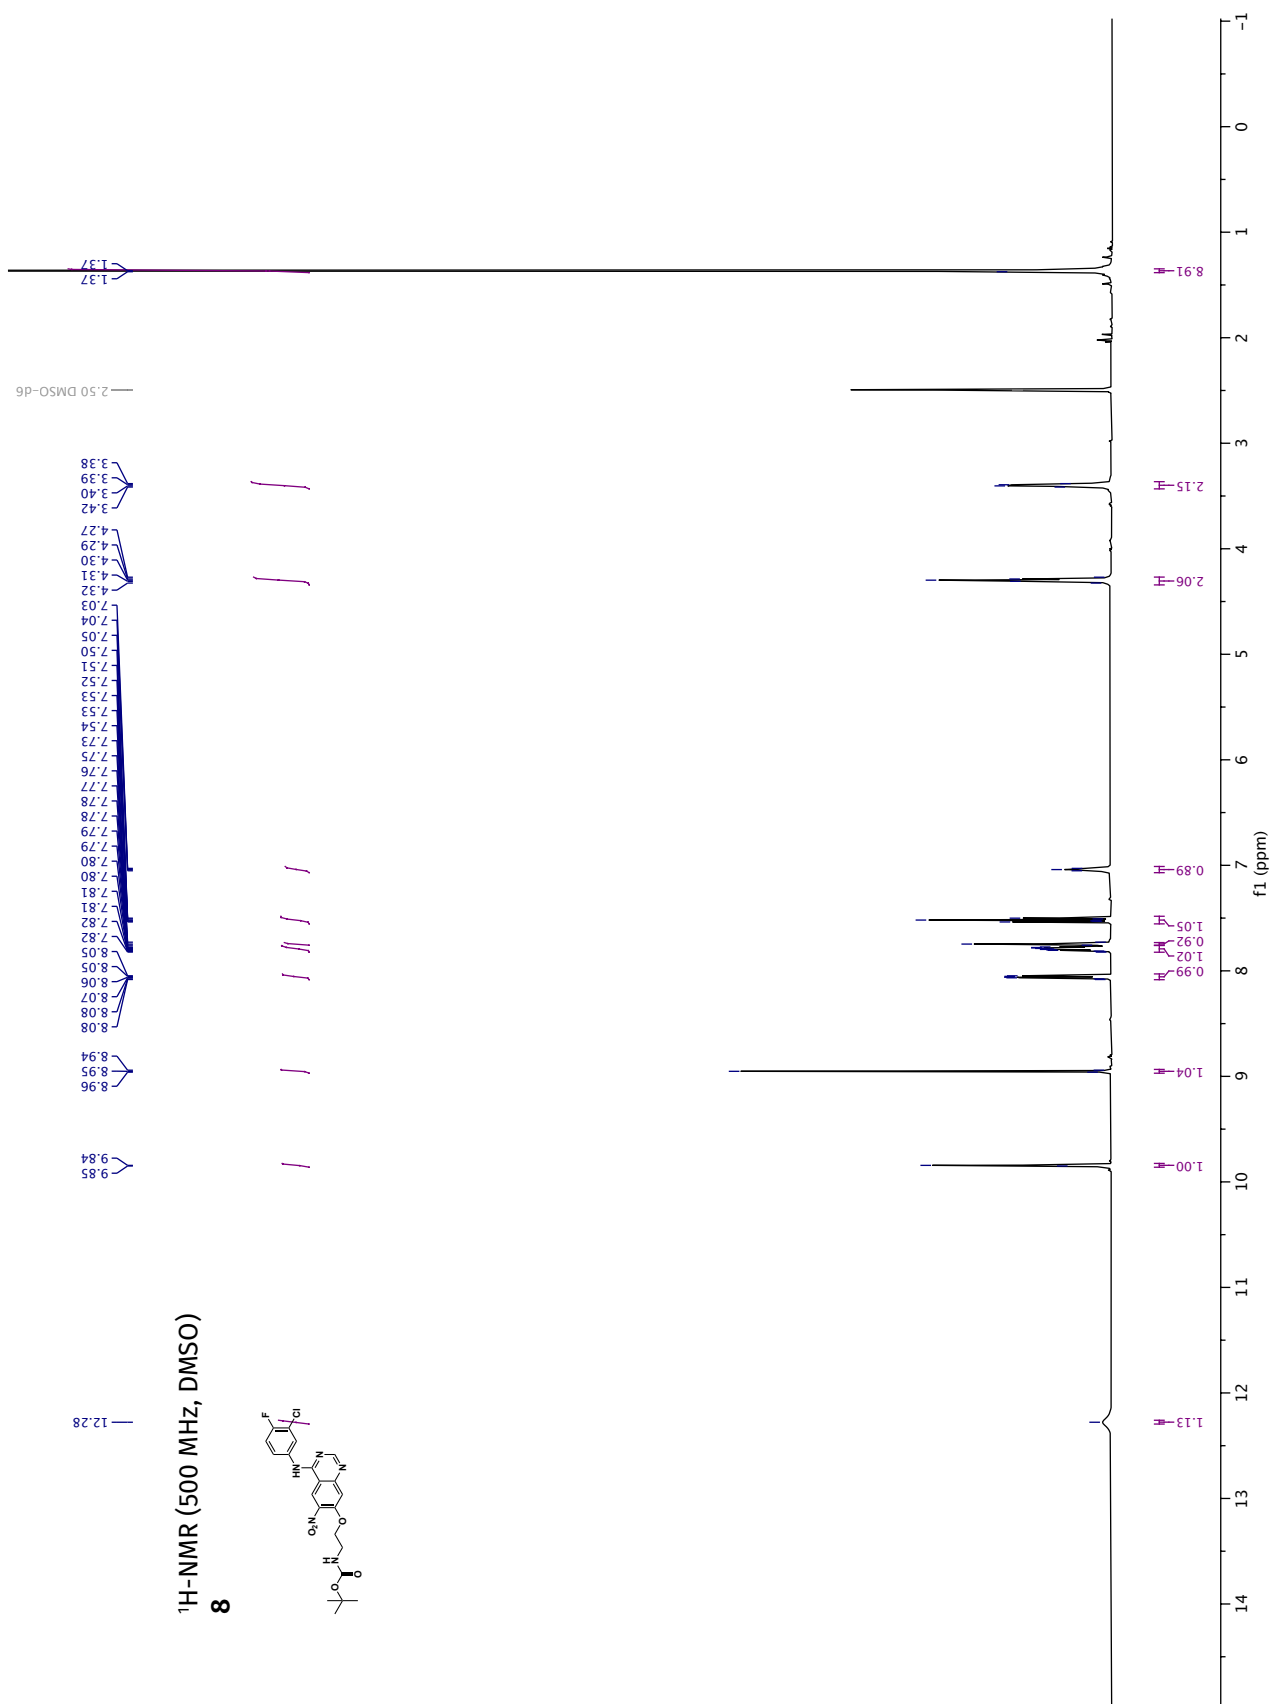

Figure S13: <sup>1</sup>H-NMR of compound 8.

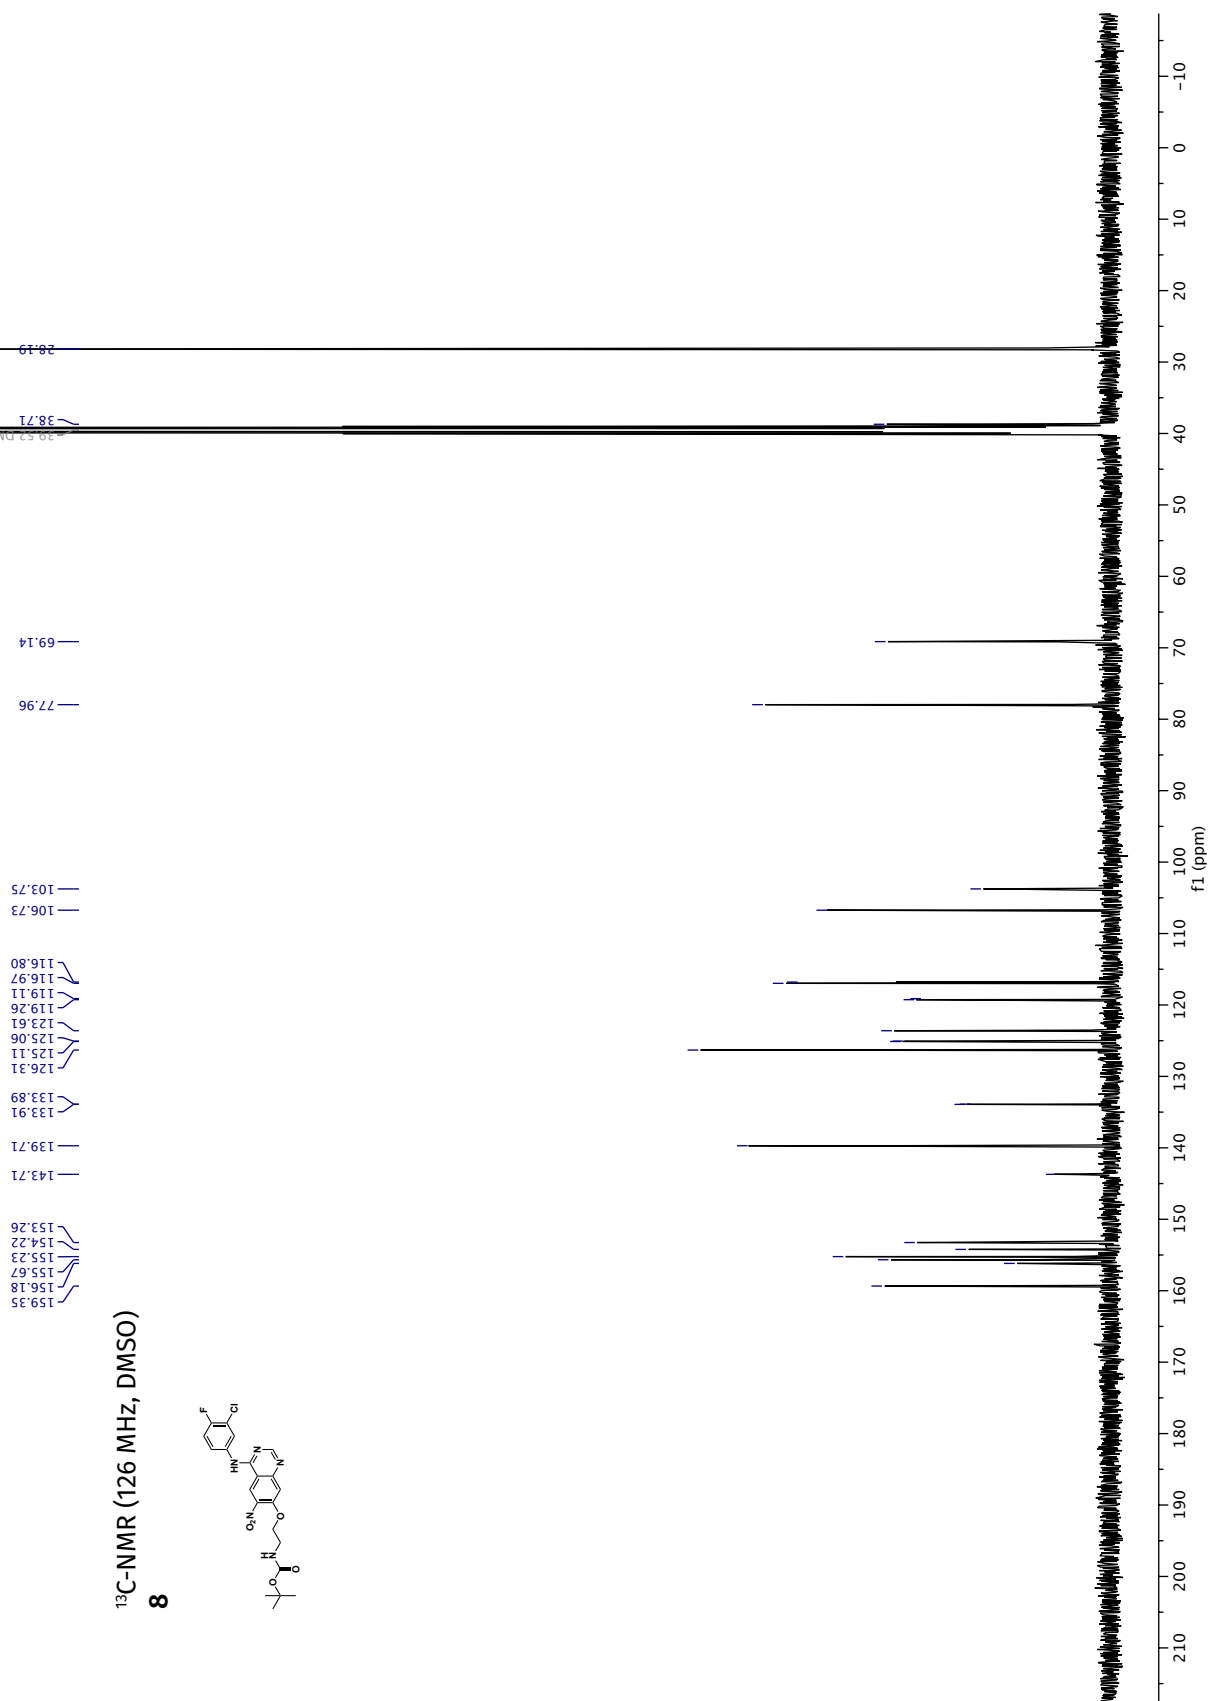

Figure S14: <sup>13</sup>C-NMR of compound 8.

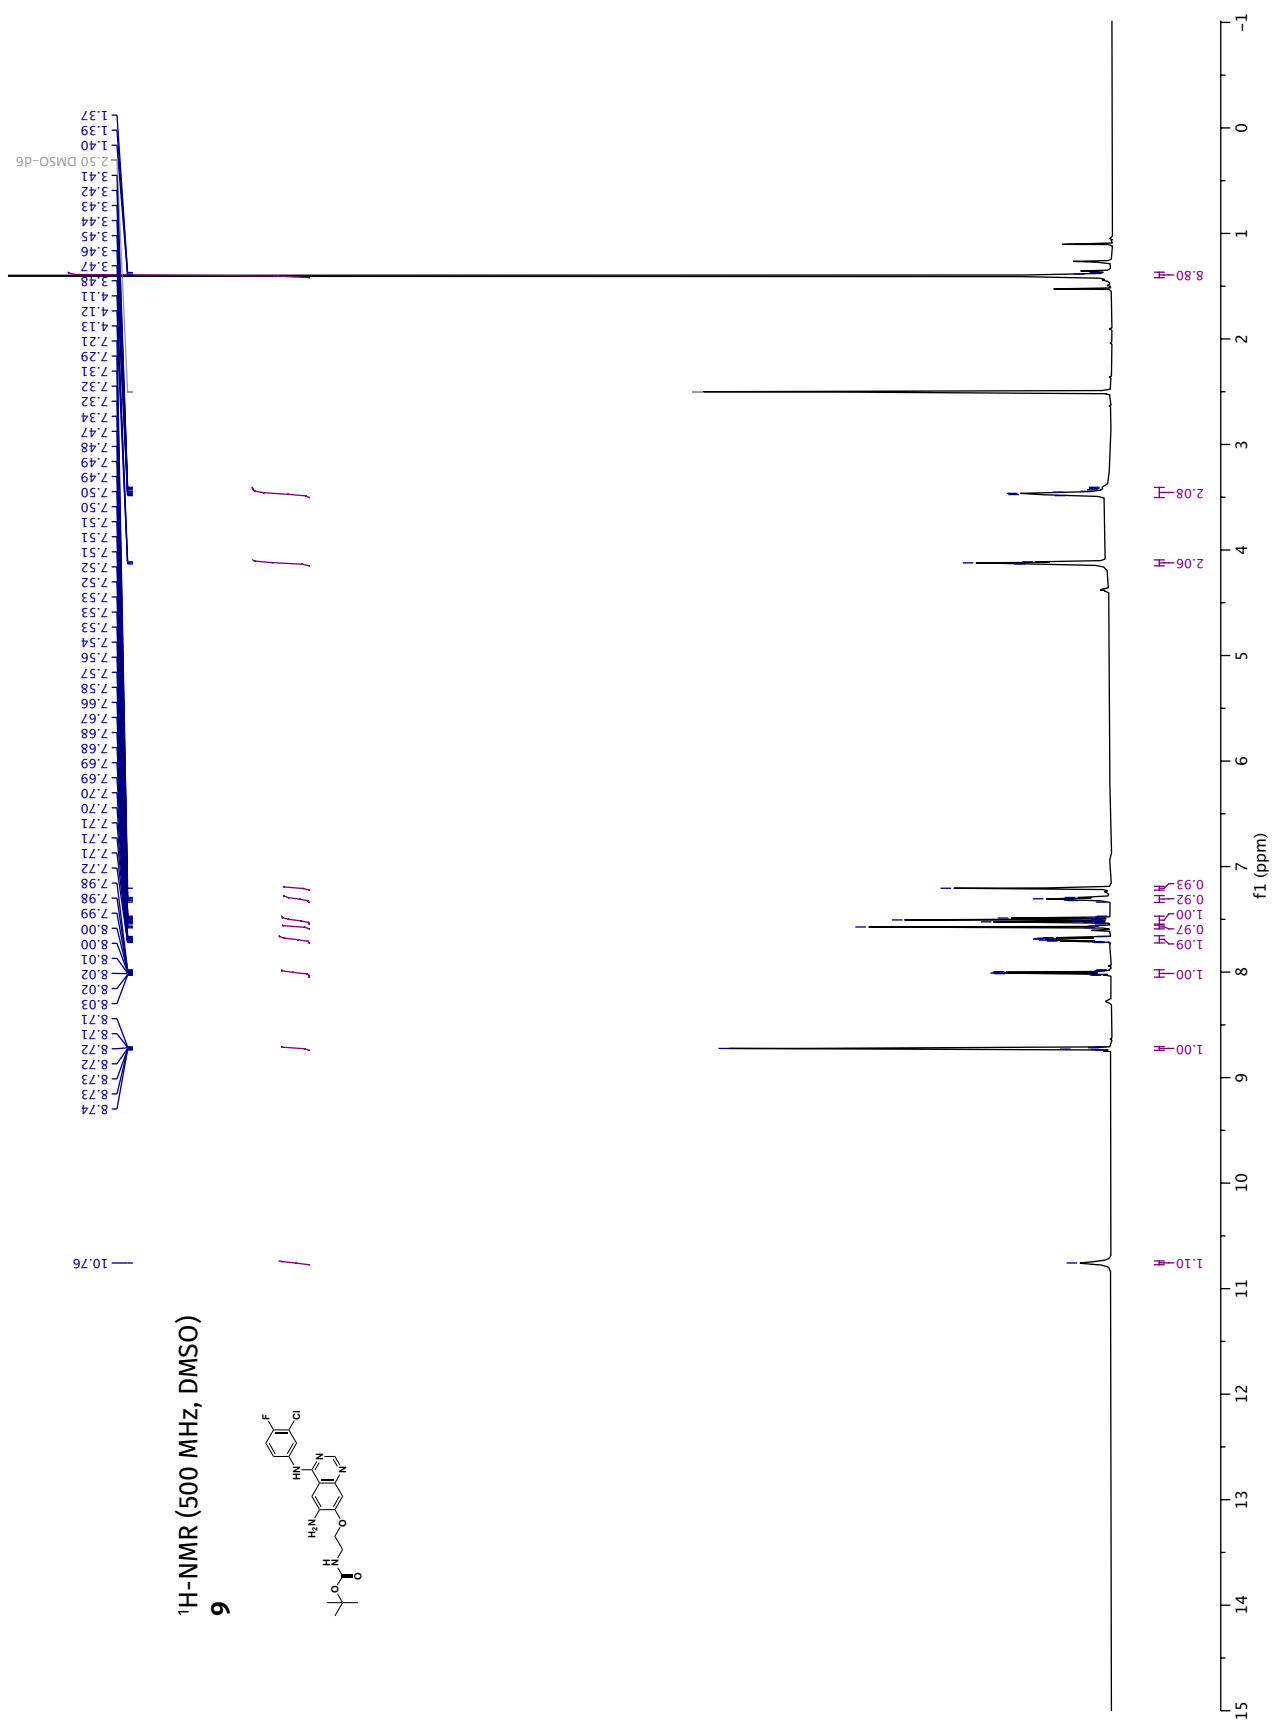

Figure S15: <sup>1</sup>H-NMR of compound 9.

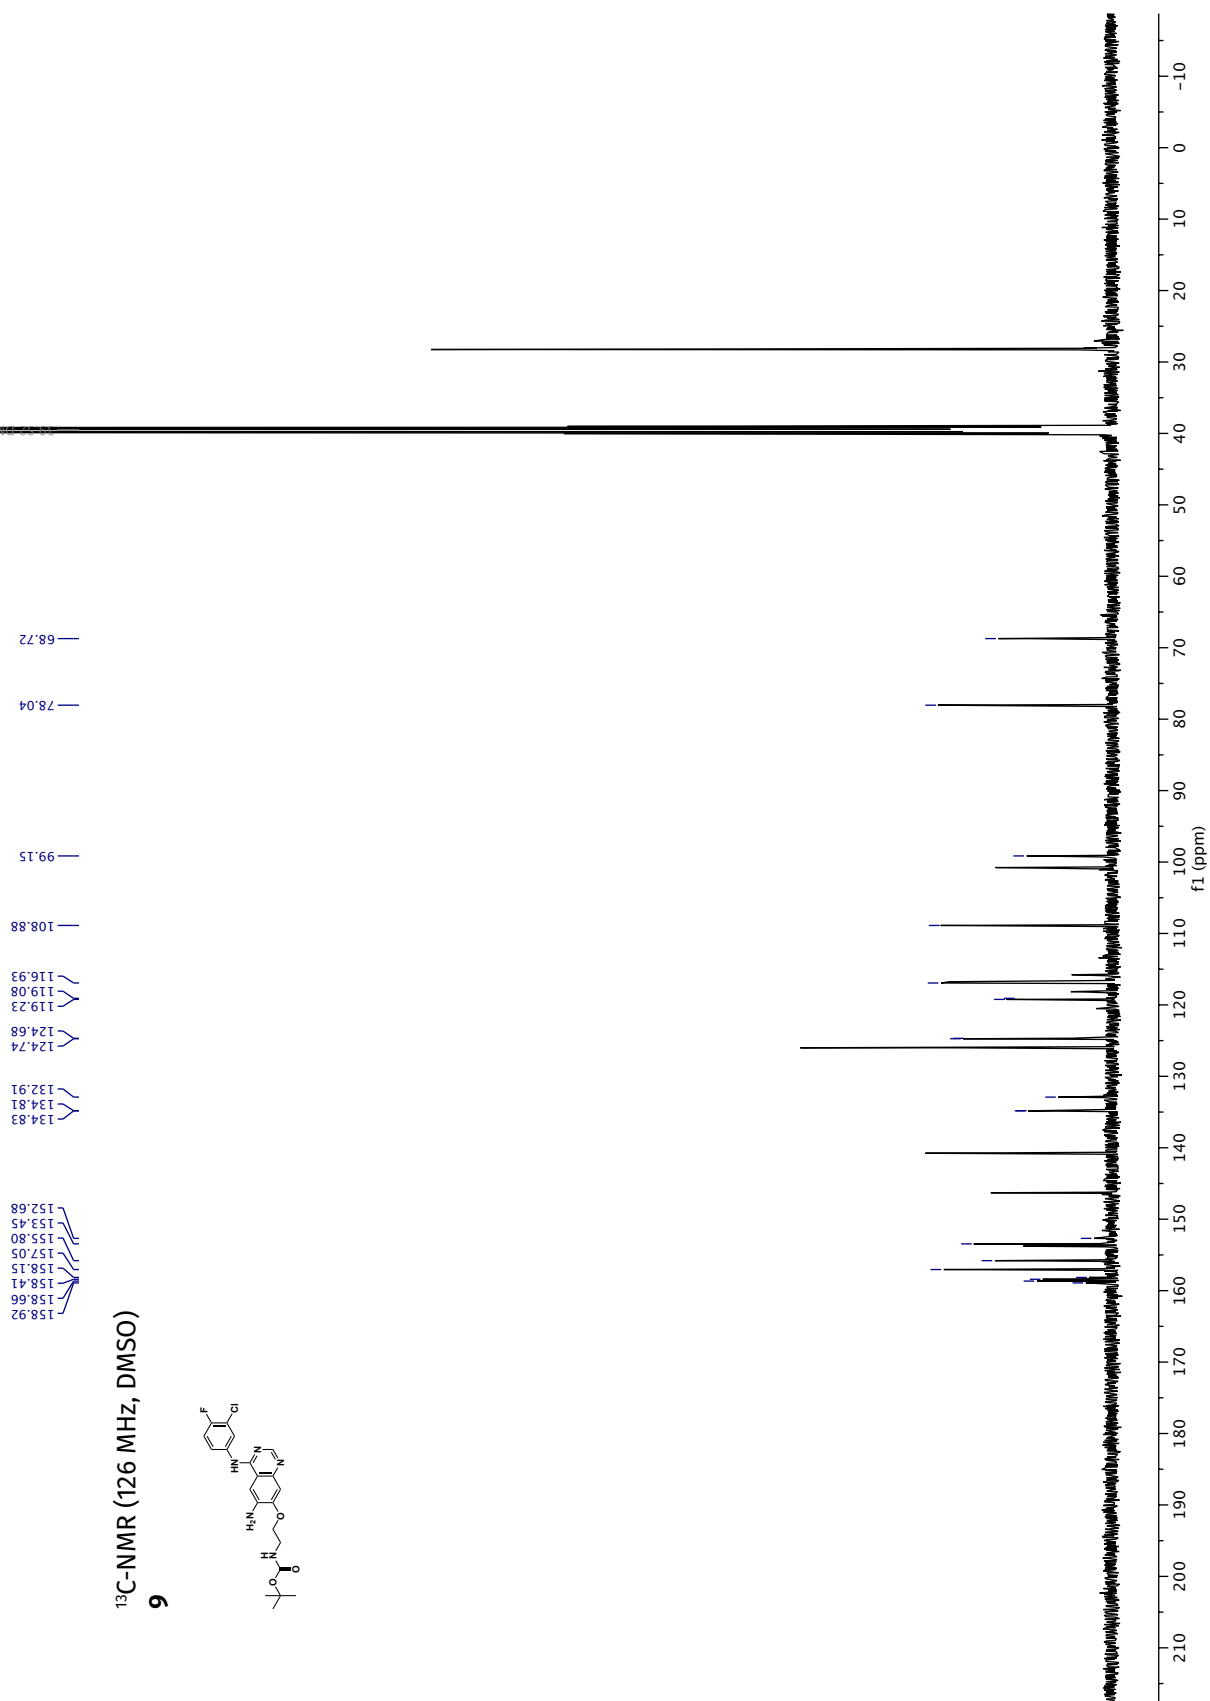

Figure S16: <sup>13</sup>C-NMR of compound 9.

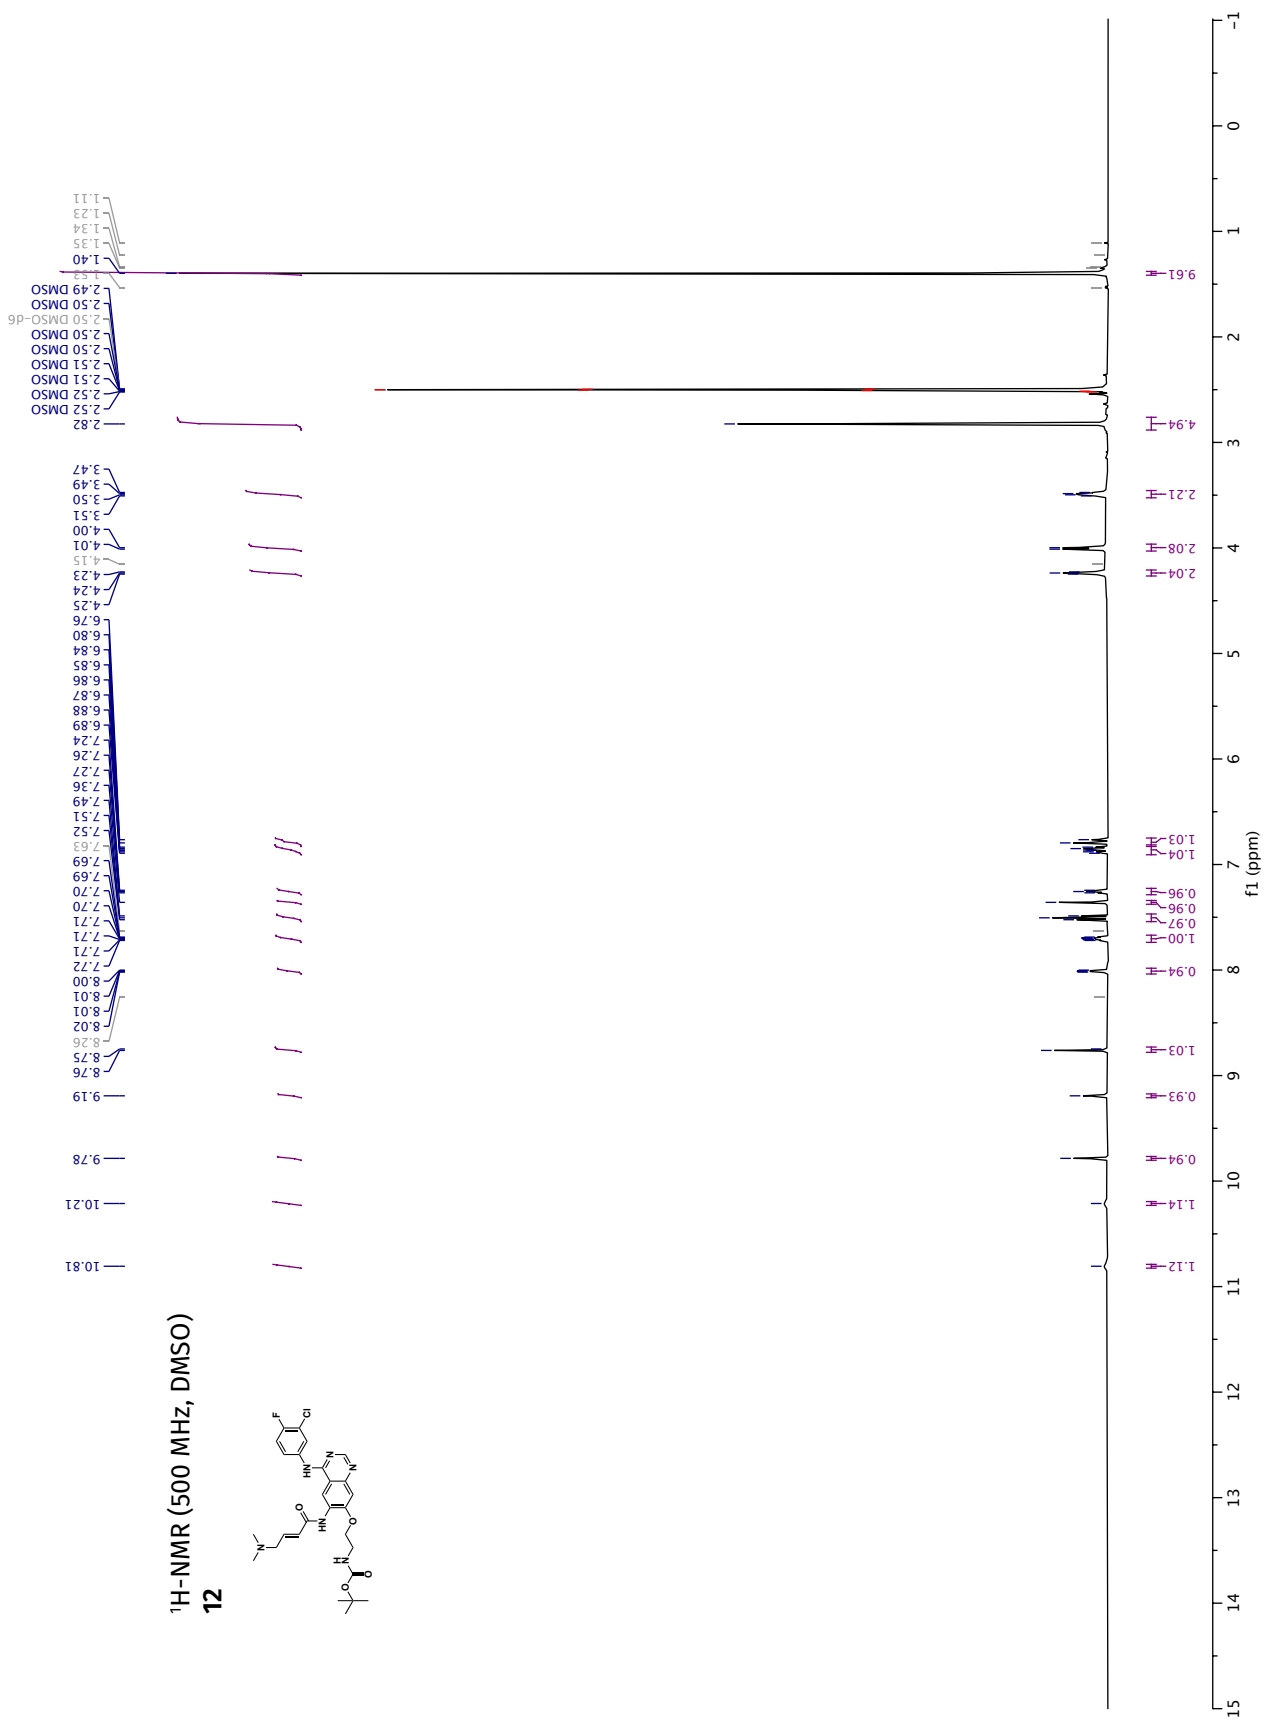

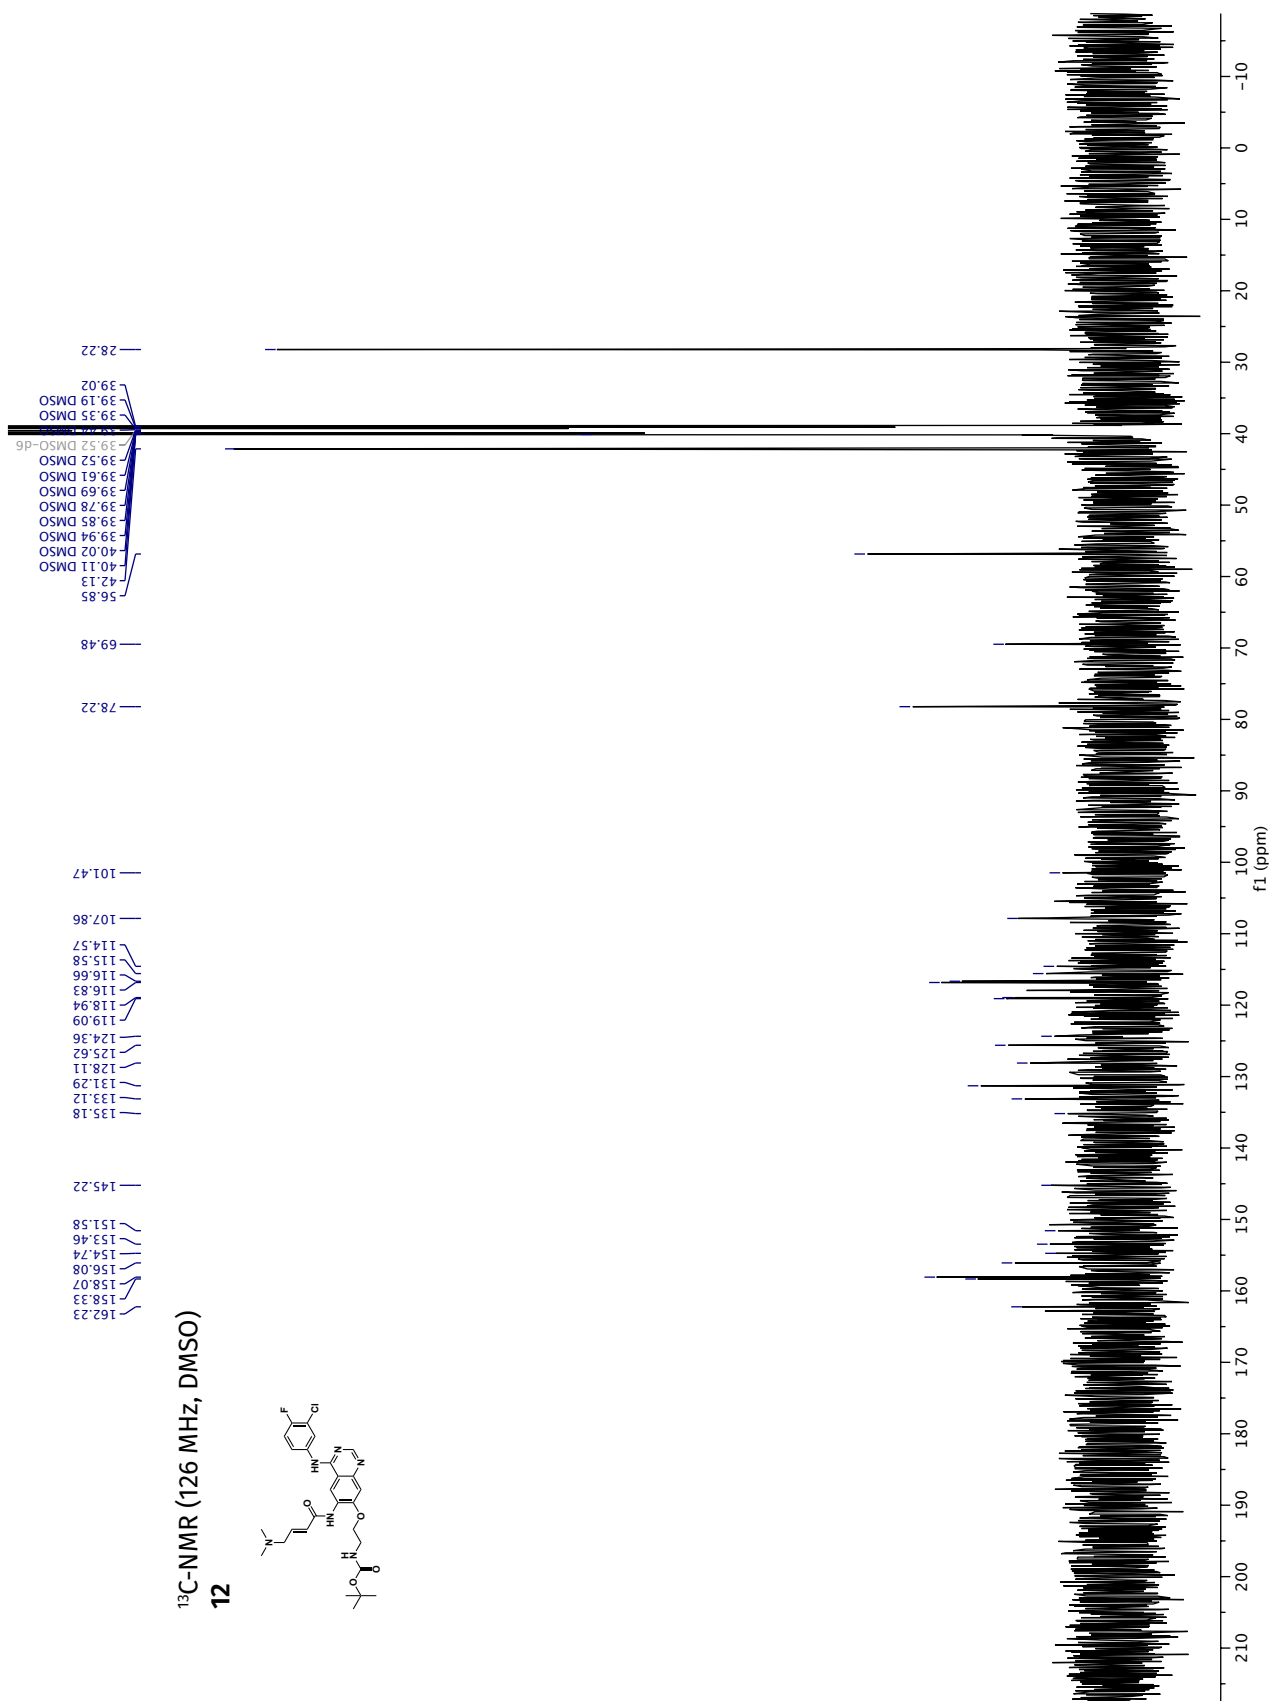

Figure S18: <sup>13</sup>C-NMR of compound 12.

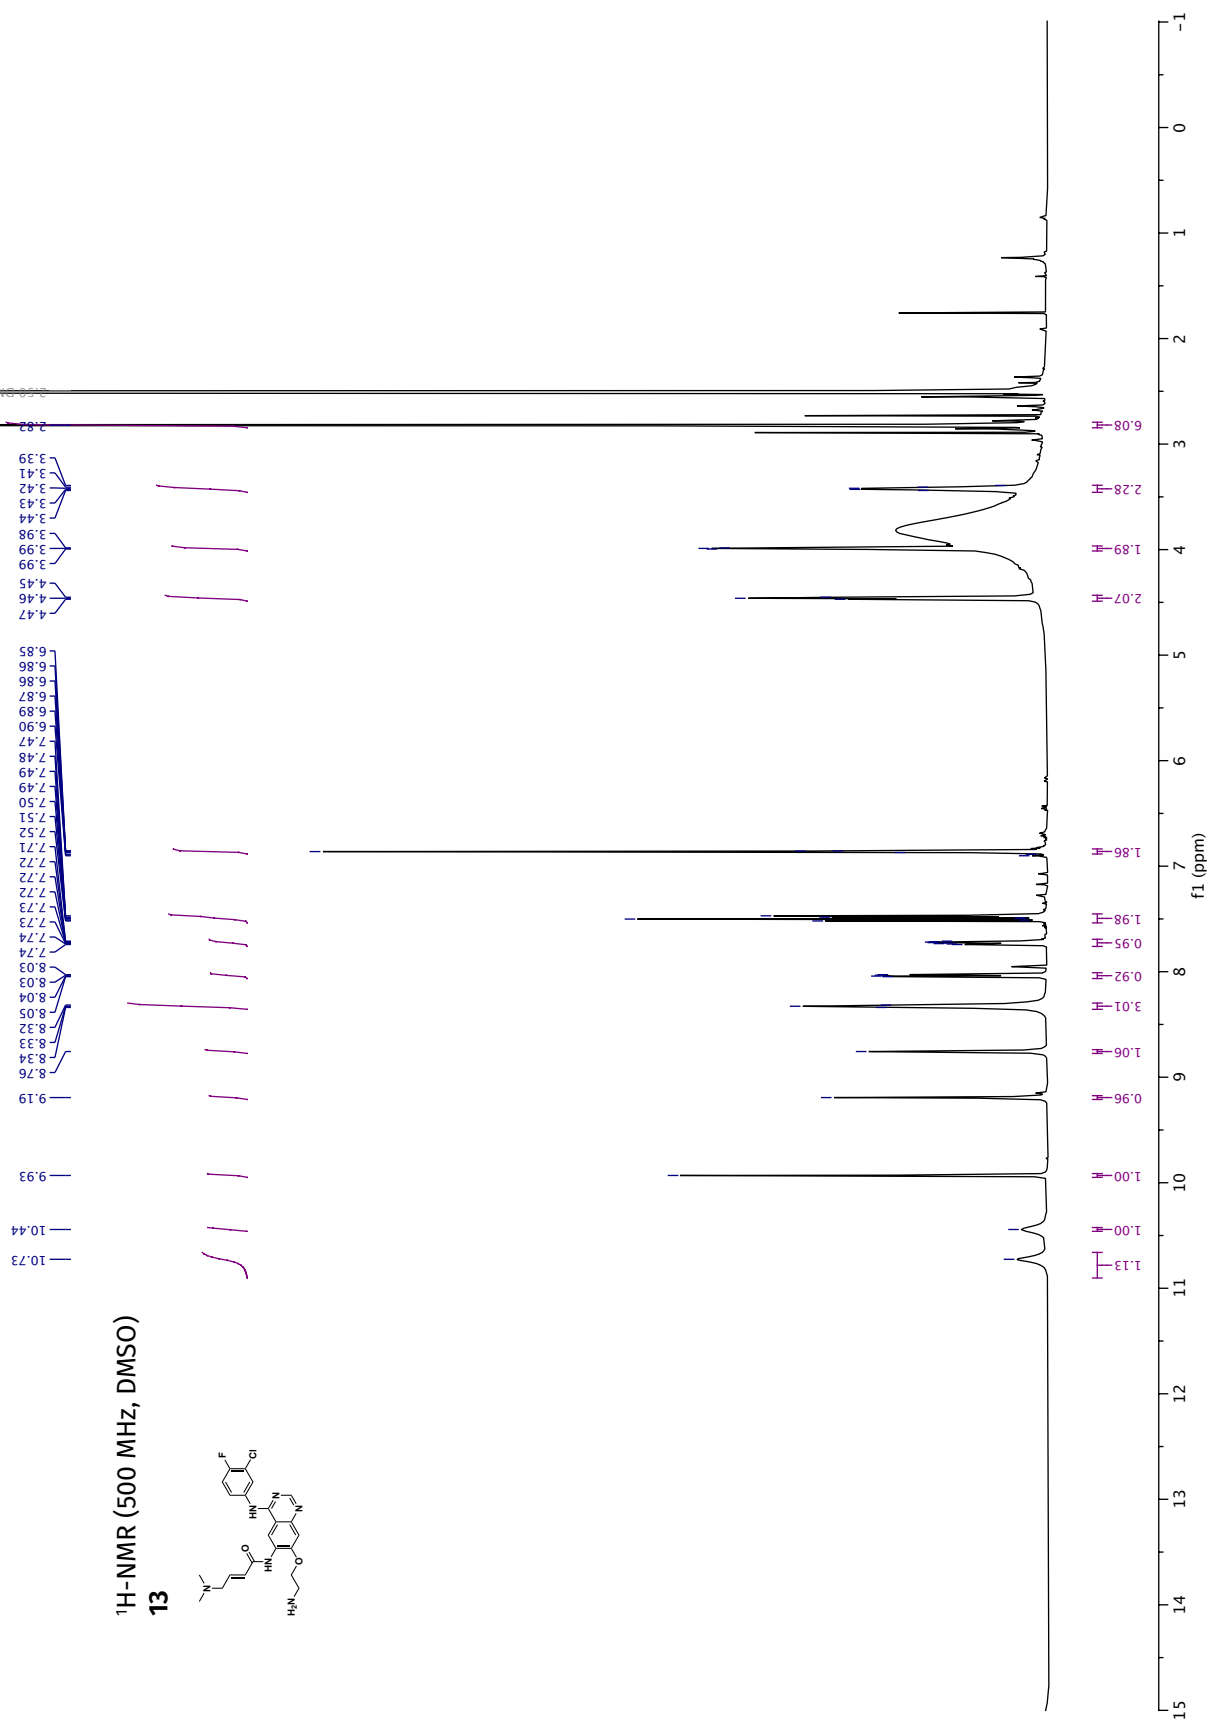

Figure S19: <sup>1</sup>H-NMR of compound 13.



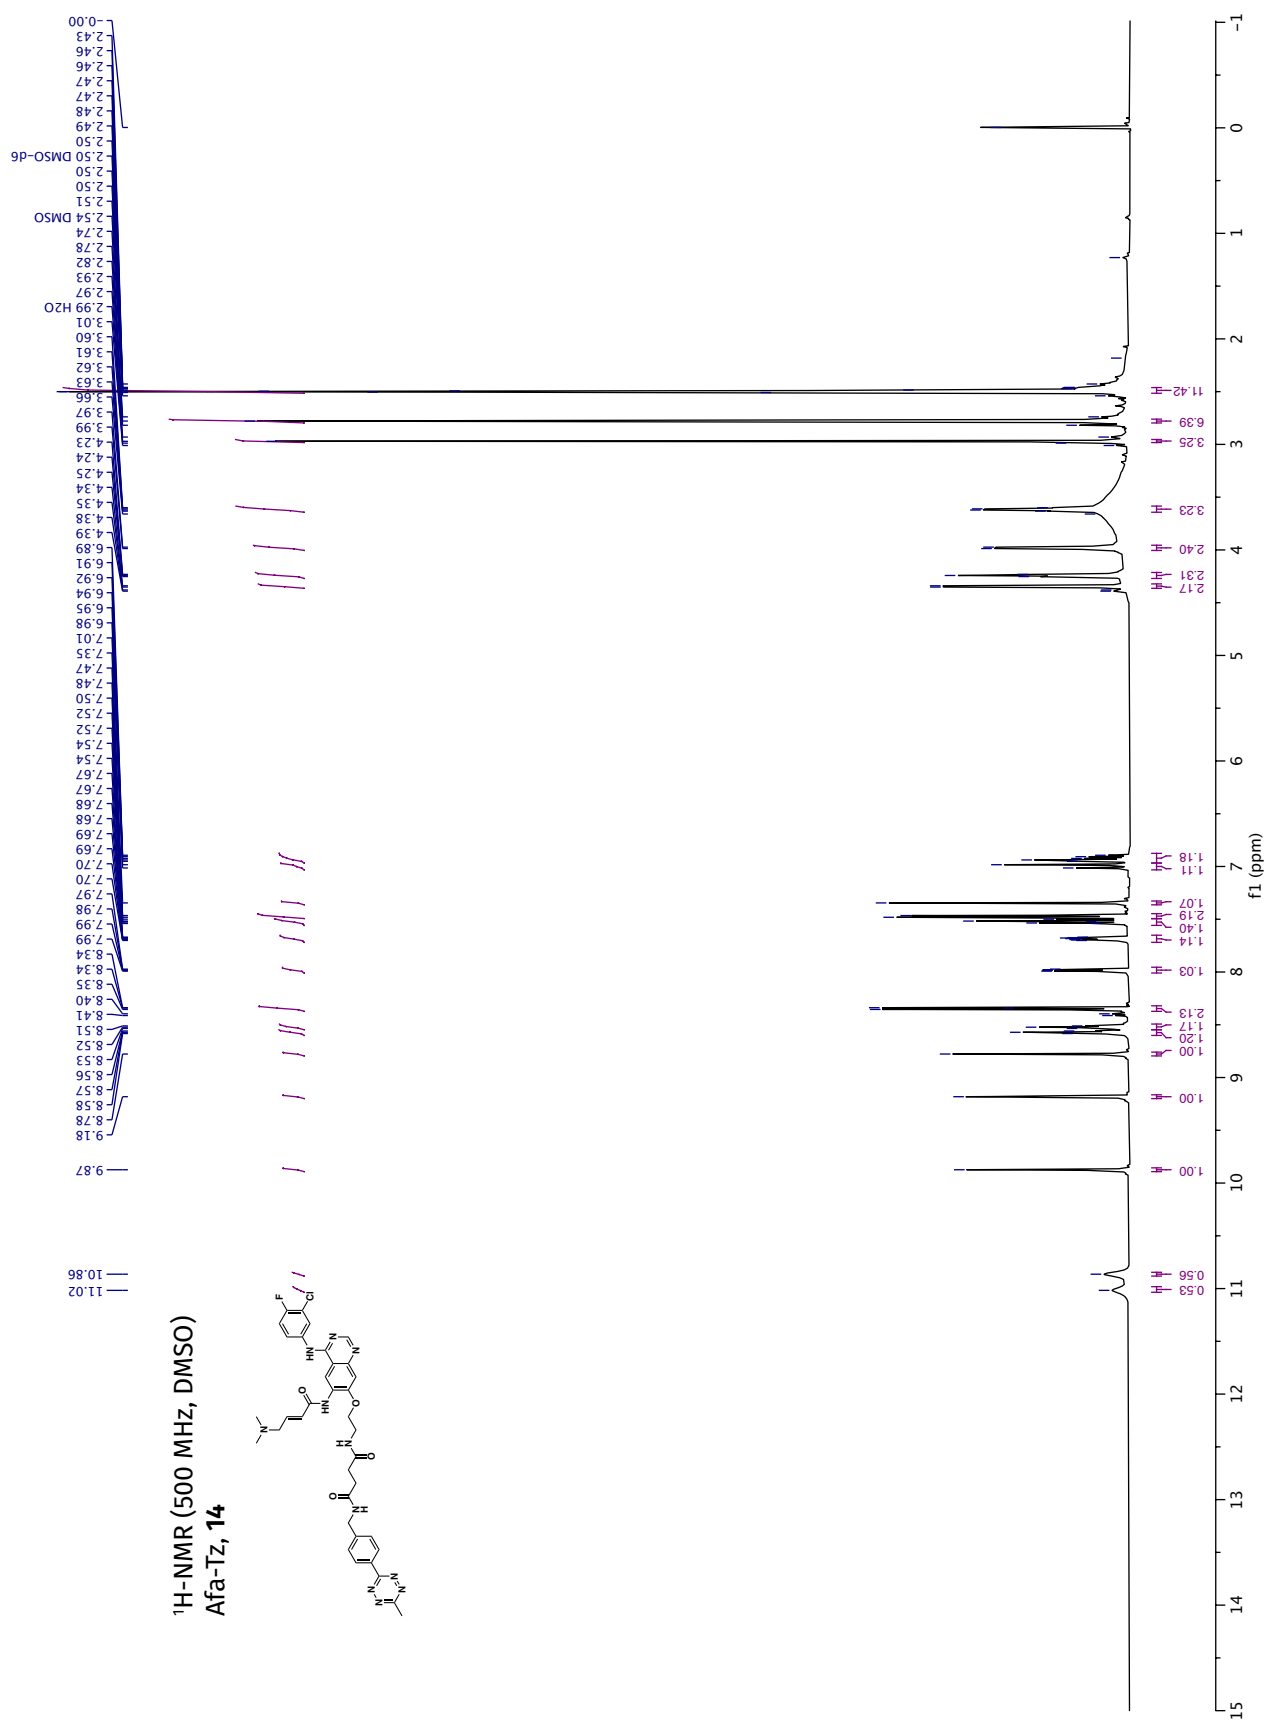

Figure S20: <sup>1</sup>H-NMR of compound **14** (Afa-Tz).

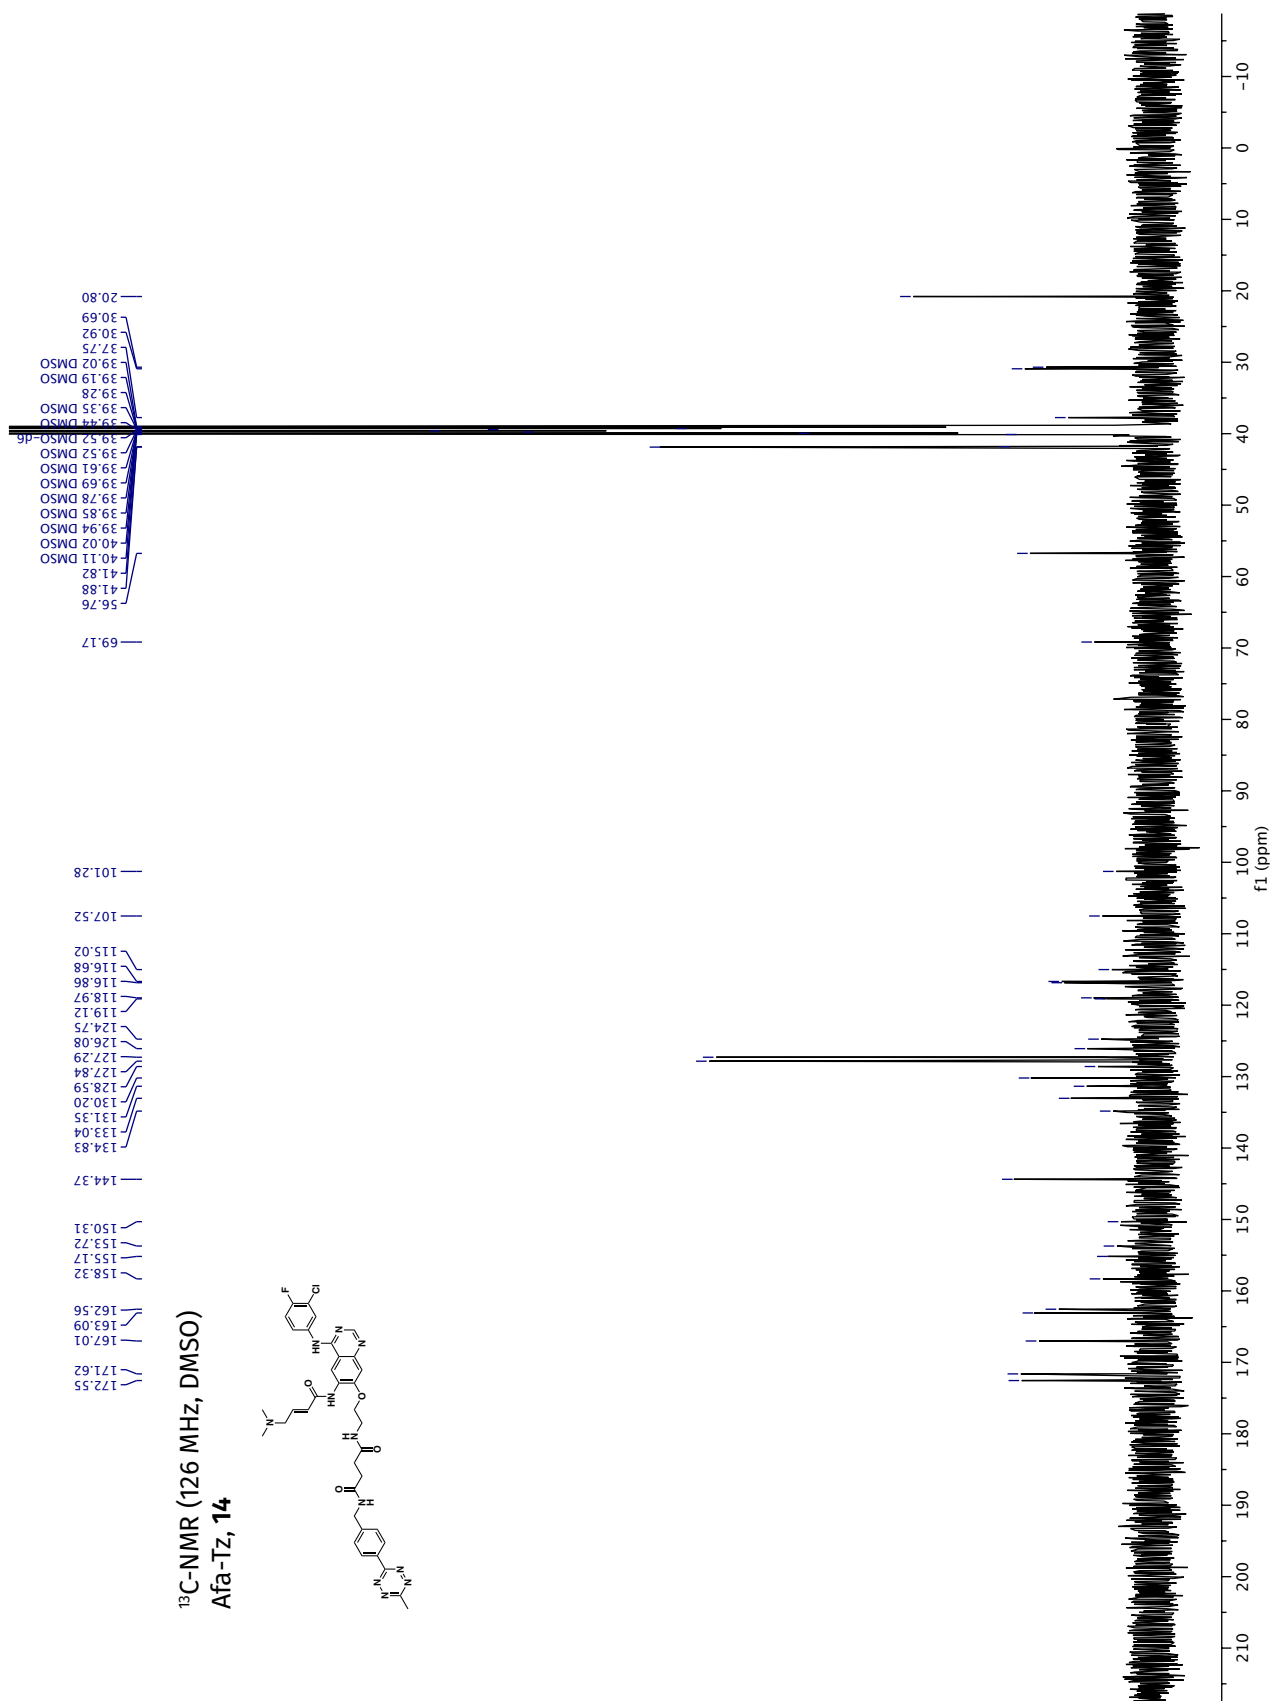

Figure S21: <sup>13</sup>C-NMR of compound 14 (Afa-Tz).





## **11 High Resolution Mass Spectra**

HRMS  
Ara-Tz, 3  
Exact Mass: 201.10145

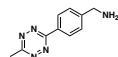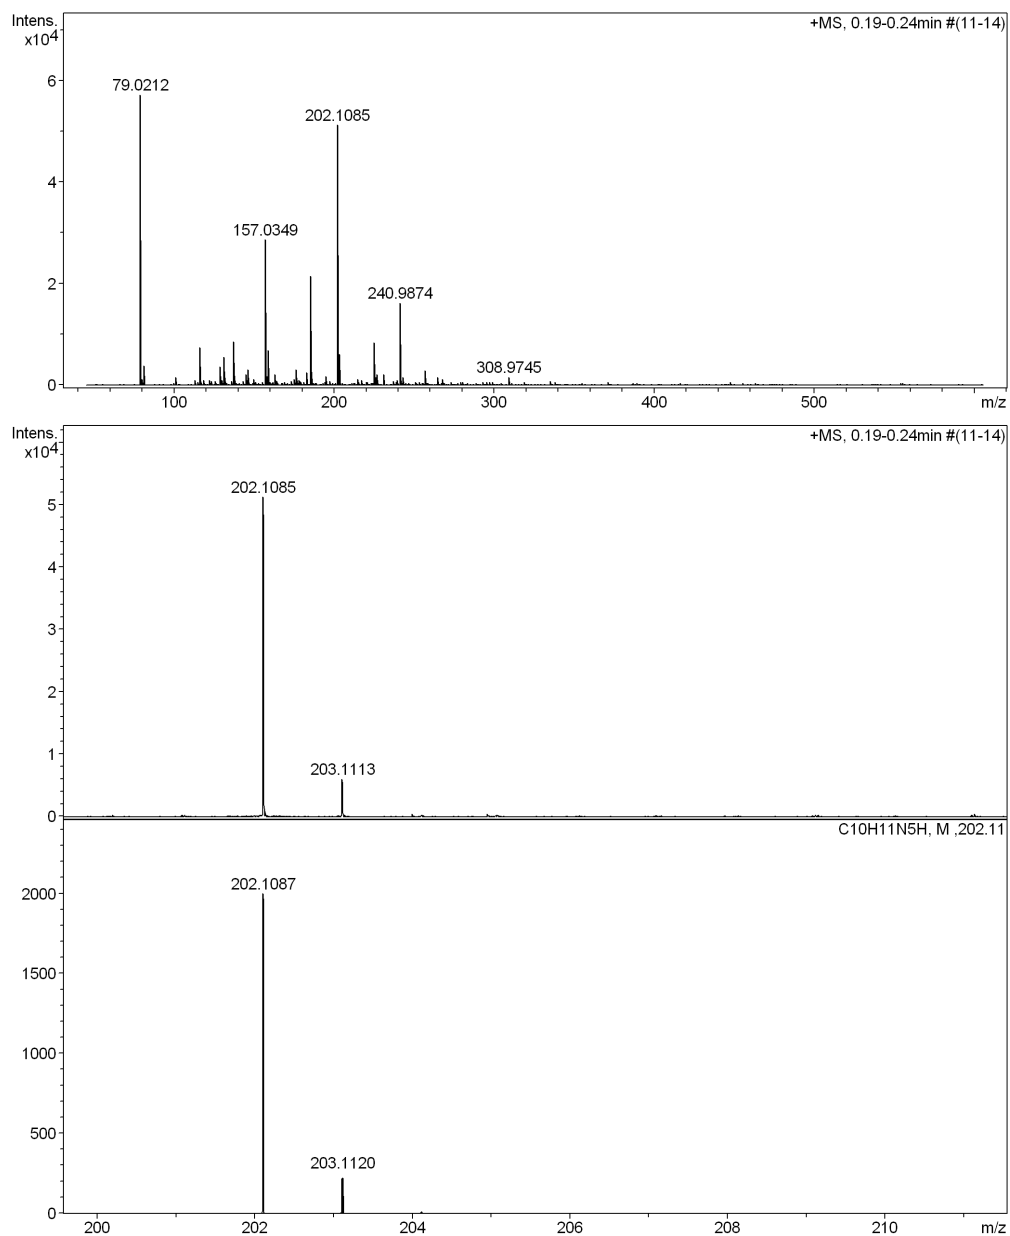

Figure S24: HRMS spectrum of compound 3 (Ara-Tz) (ESI+).

HRMS

5

Exact Mass: 301.11749

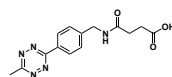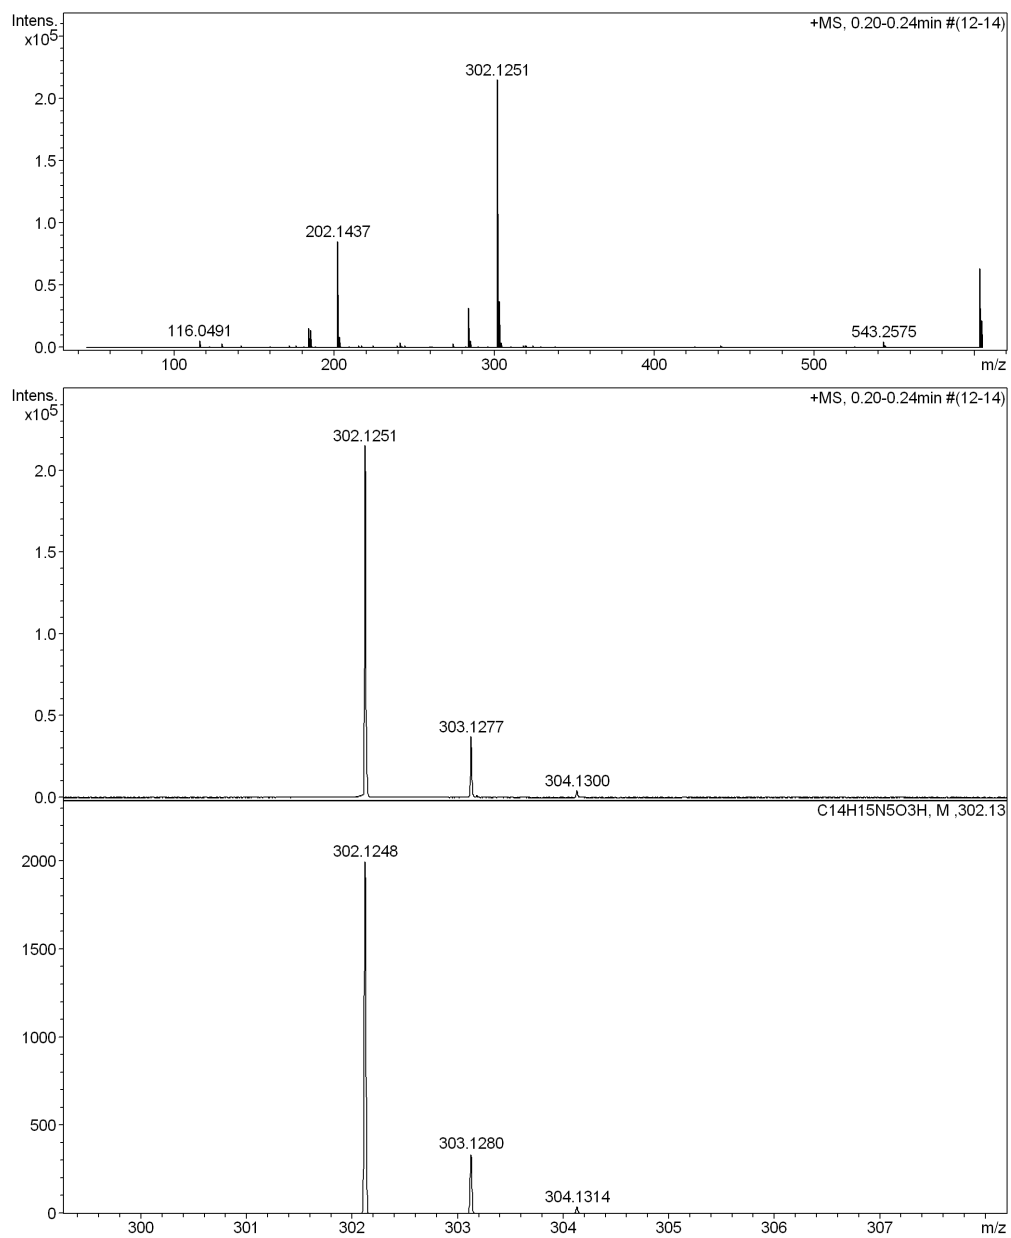

Figure S25: HRMS spectrum of compound 5 (ESI+).

# HRMS

**8**

Exact Mass: 477.12152

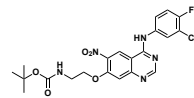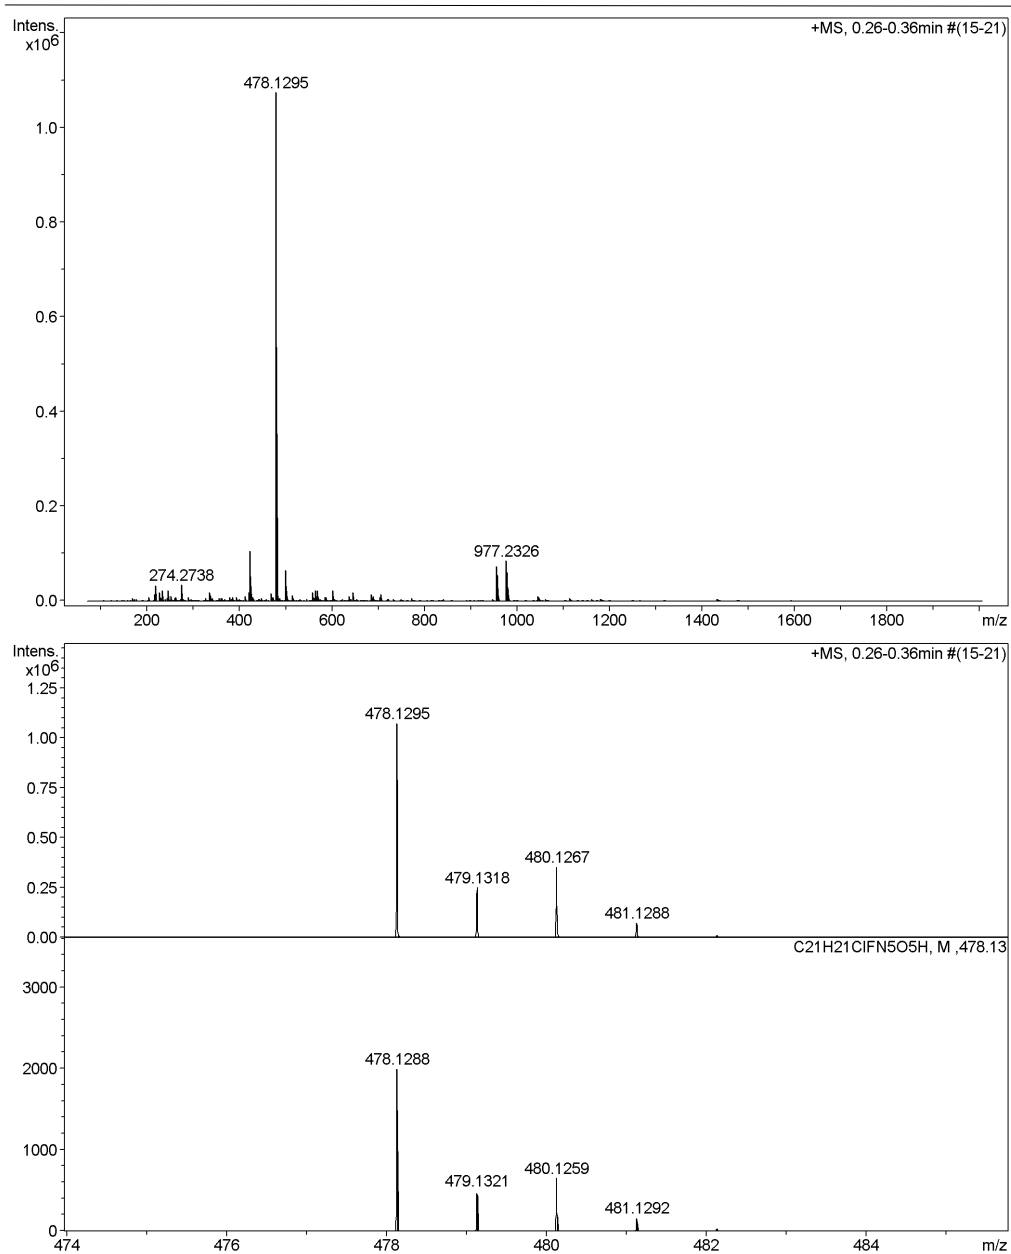

Figure S26: HRMS spectrum of compound **8** (ESI+).



# HRMS

**9**

Exact Mass: 447.14735

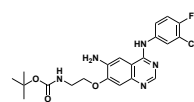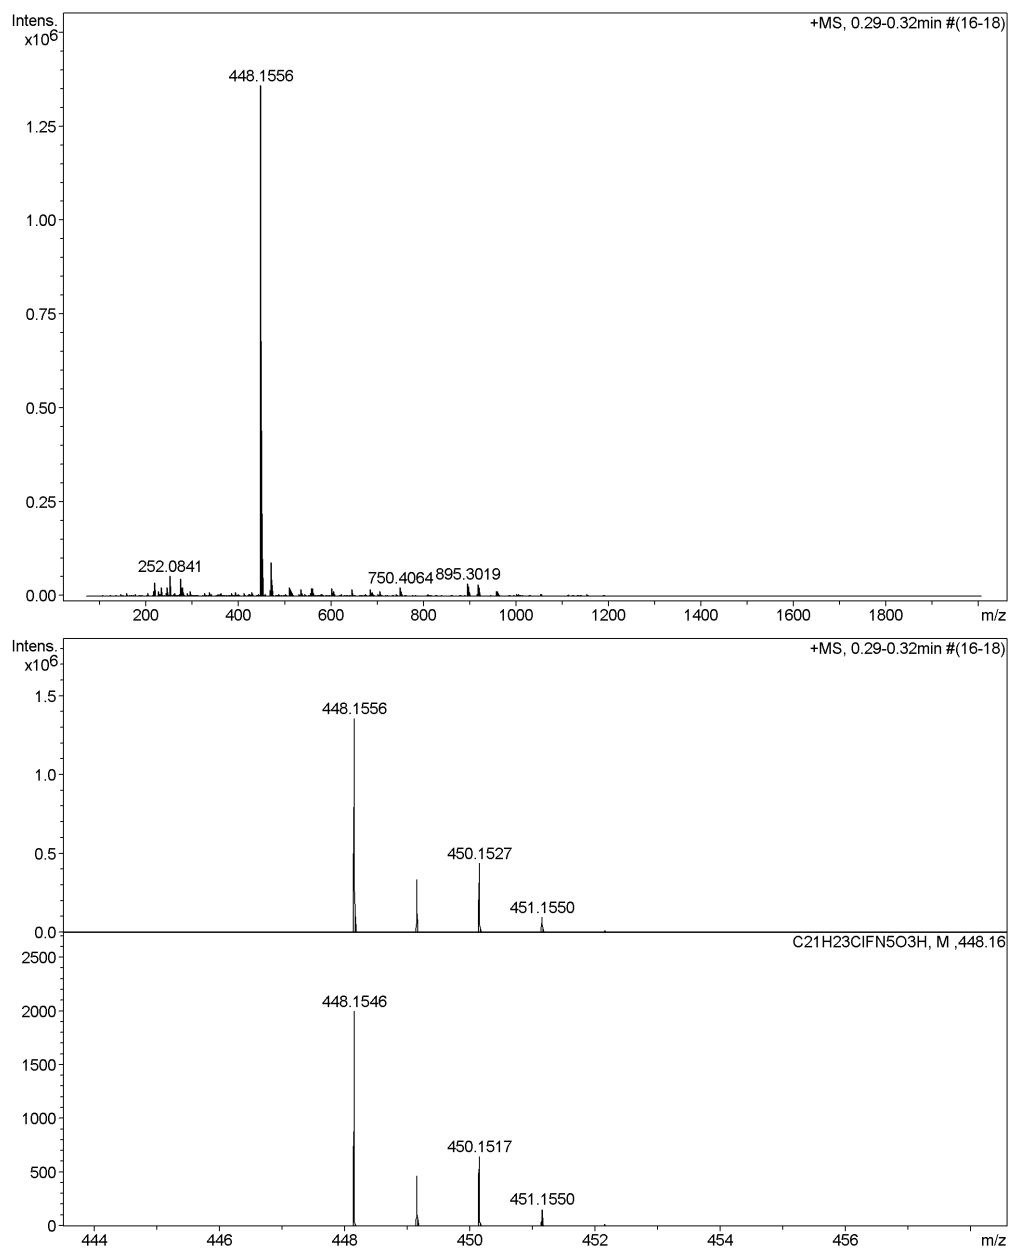

Figure S27: HRMS spectrum of compound 9 (ESI+).

HRMS  
12

Exact Mass: 558.21576

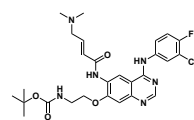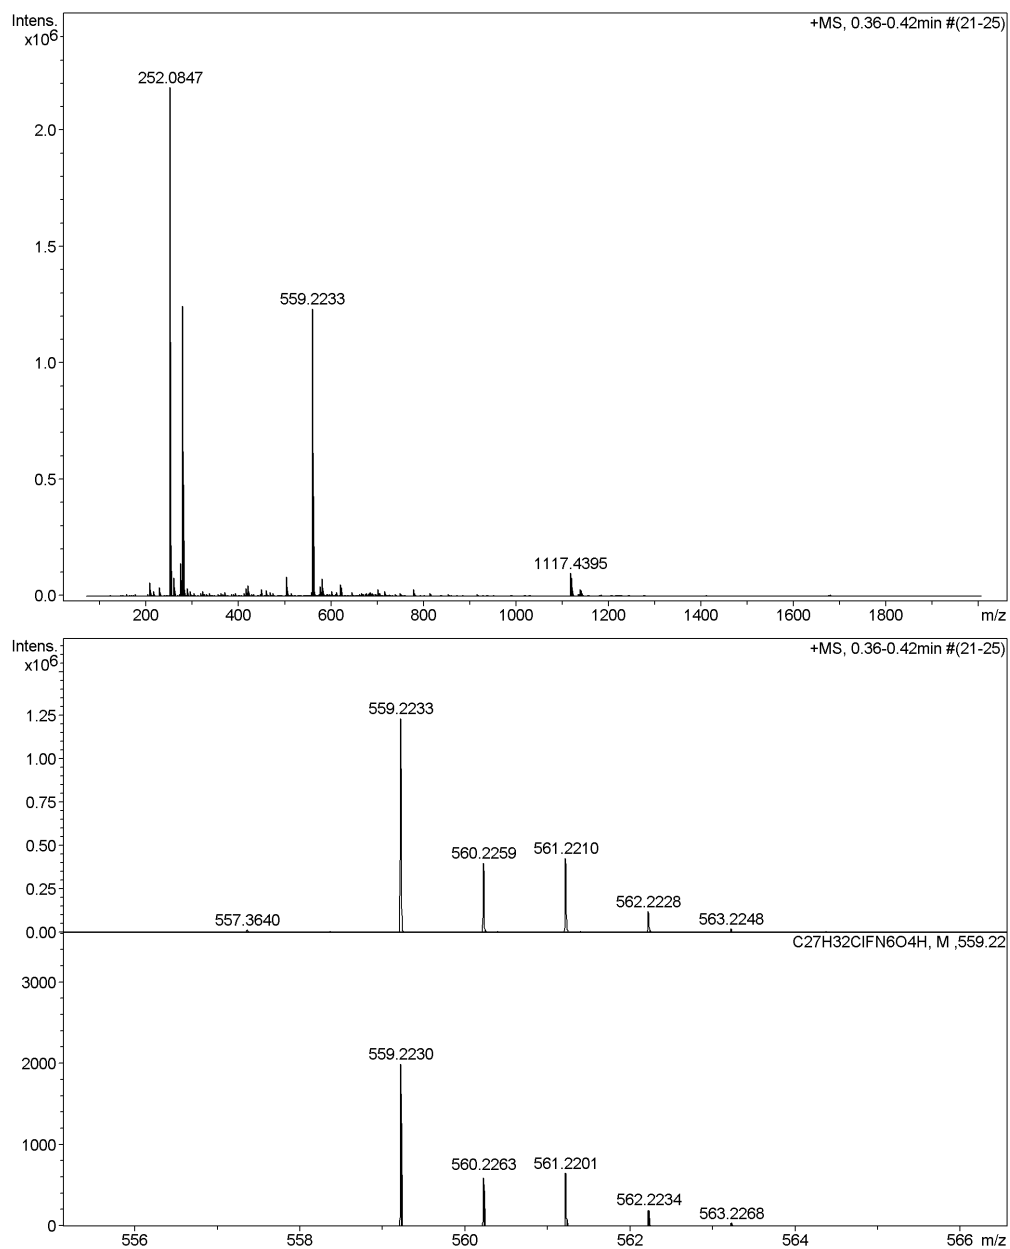

Figure S28: HRMS spectrum of compound 12 (ESI+).

HRMS

**13**

Exact Mass: 458.16333

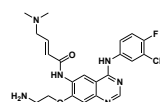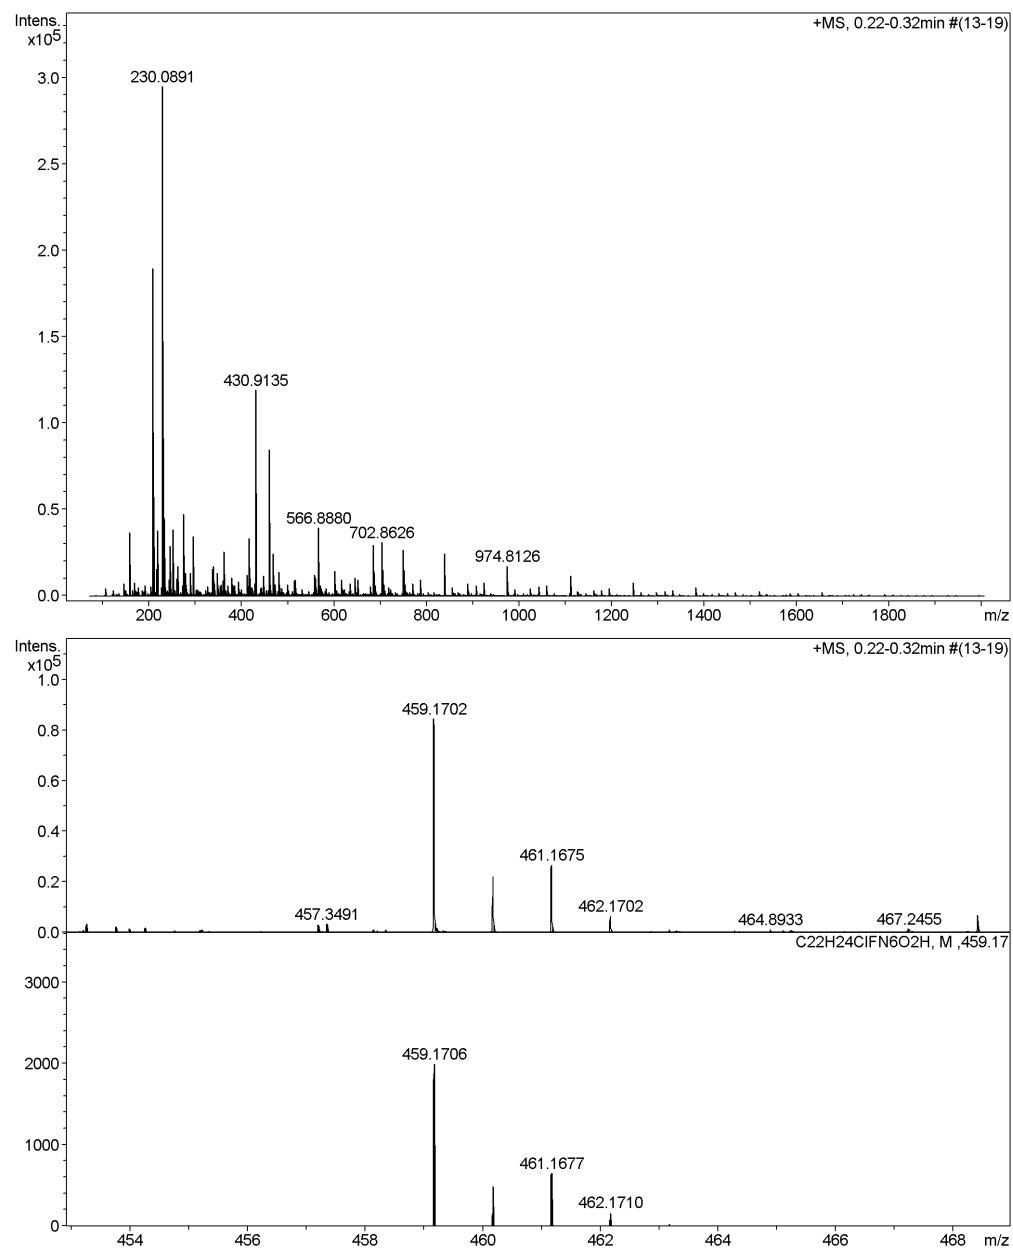

Figure S29: HRMS spectrum of compound 13 (ESI+).

HRMS  
Afa-Tz, **14**  
Exact Mass: 741.27025

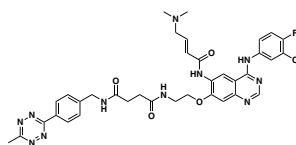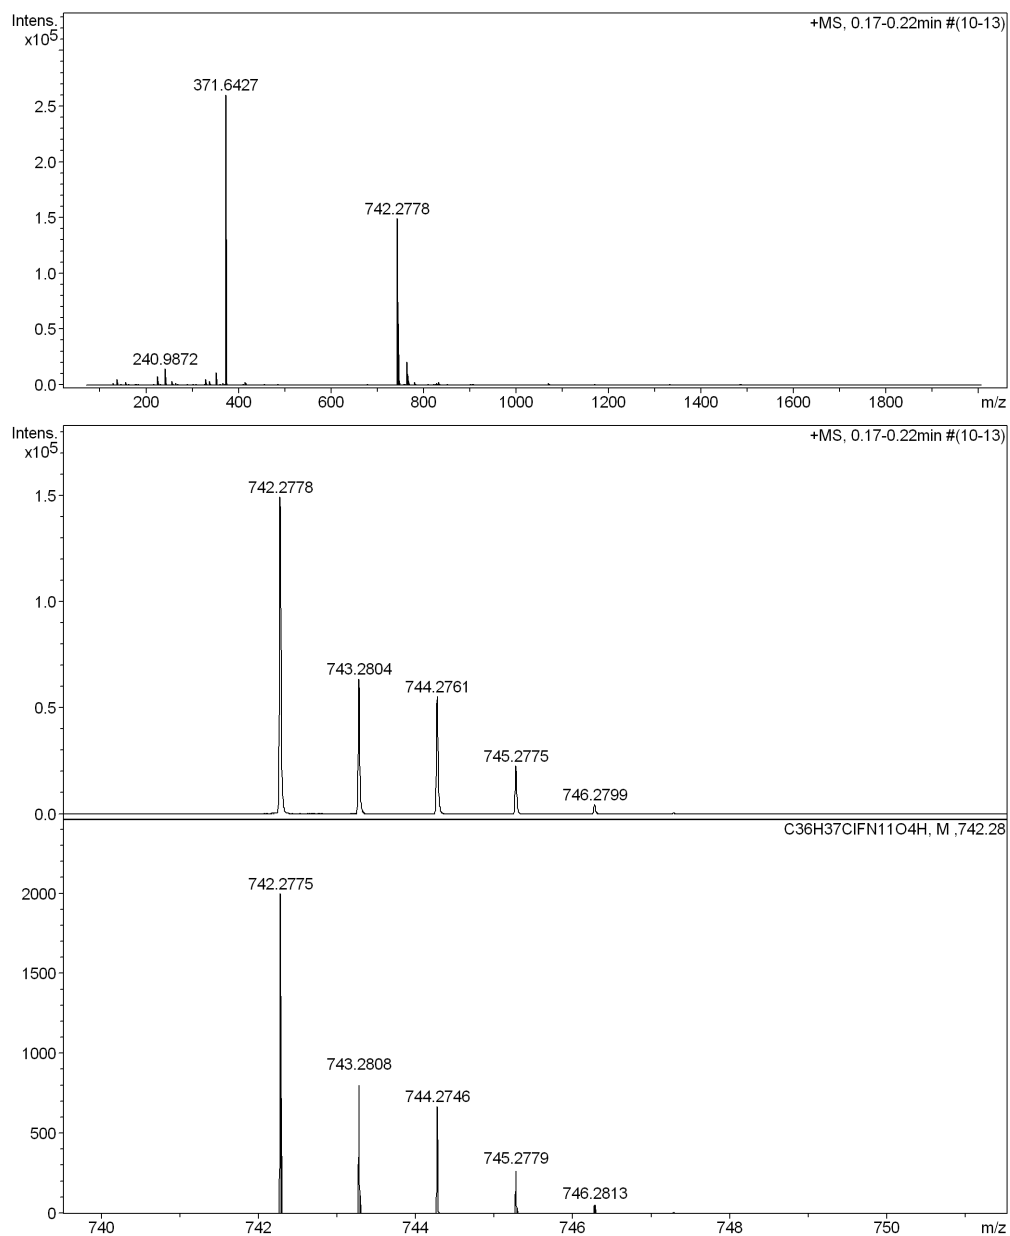

Figure S30: HRMS spectrum of compound **14** (Afa-Tz) (ESI+).

HRMS  
Dox-TCO, **17**  
Exact Mass: 695.25779

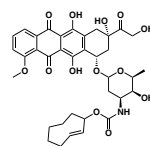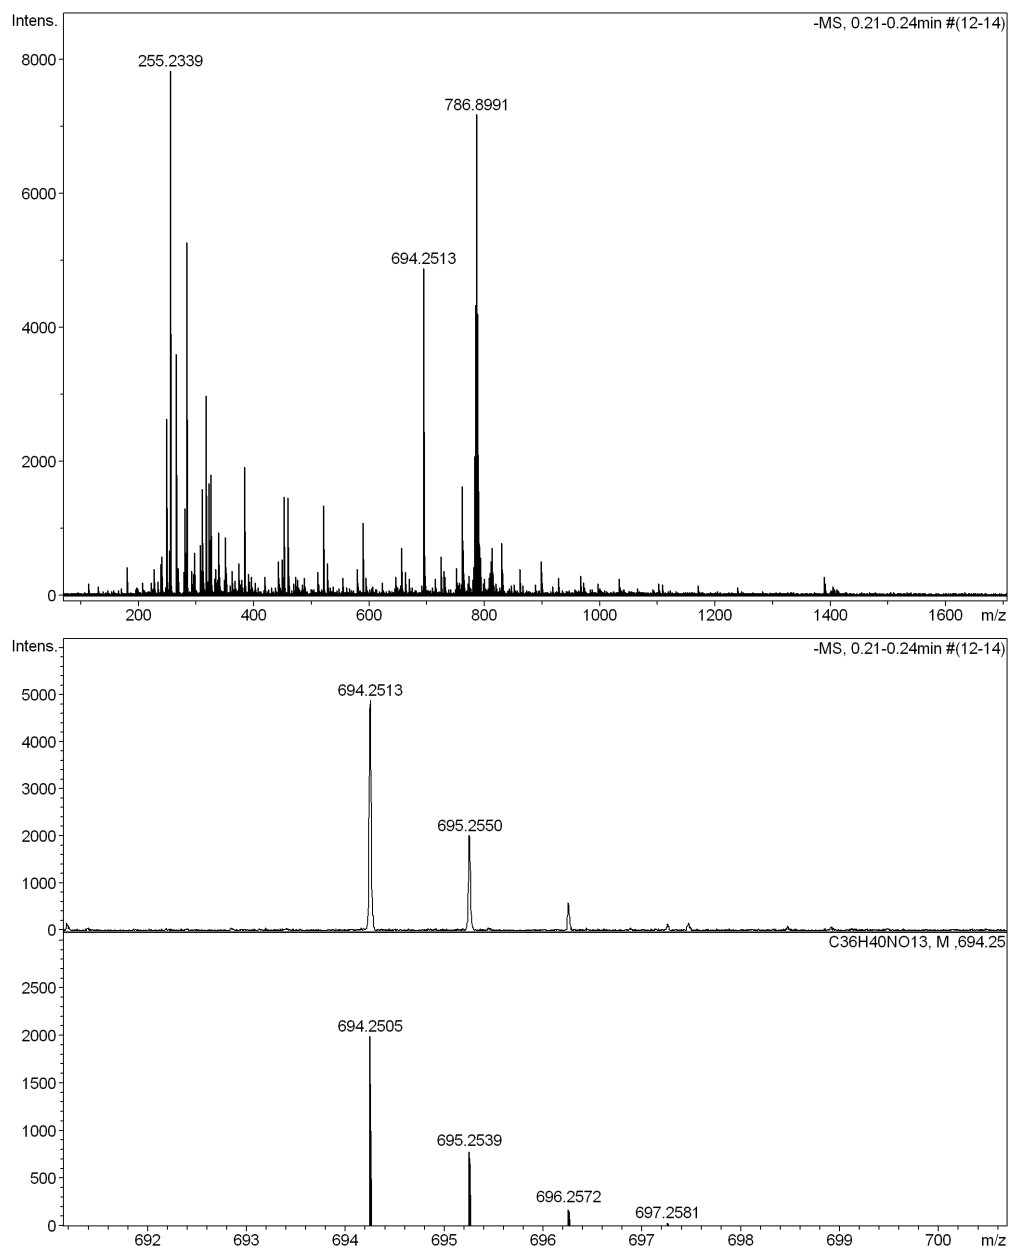

Figure S31: HRMS spectrum of compound 17 (Dox-TCO) (ESI-).

HRMS  
MMAE-TCO, **19**  
Exact Mass: 869.58778

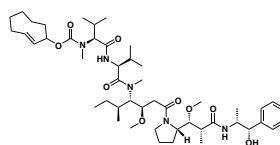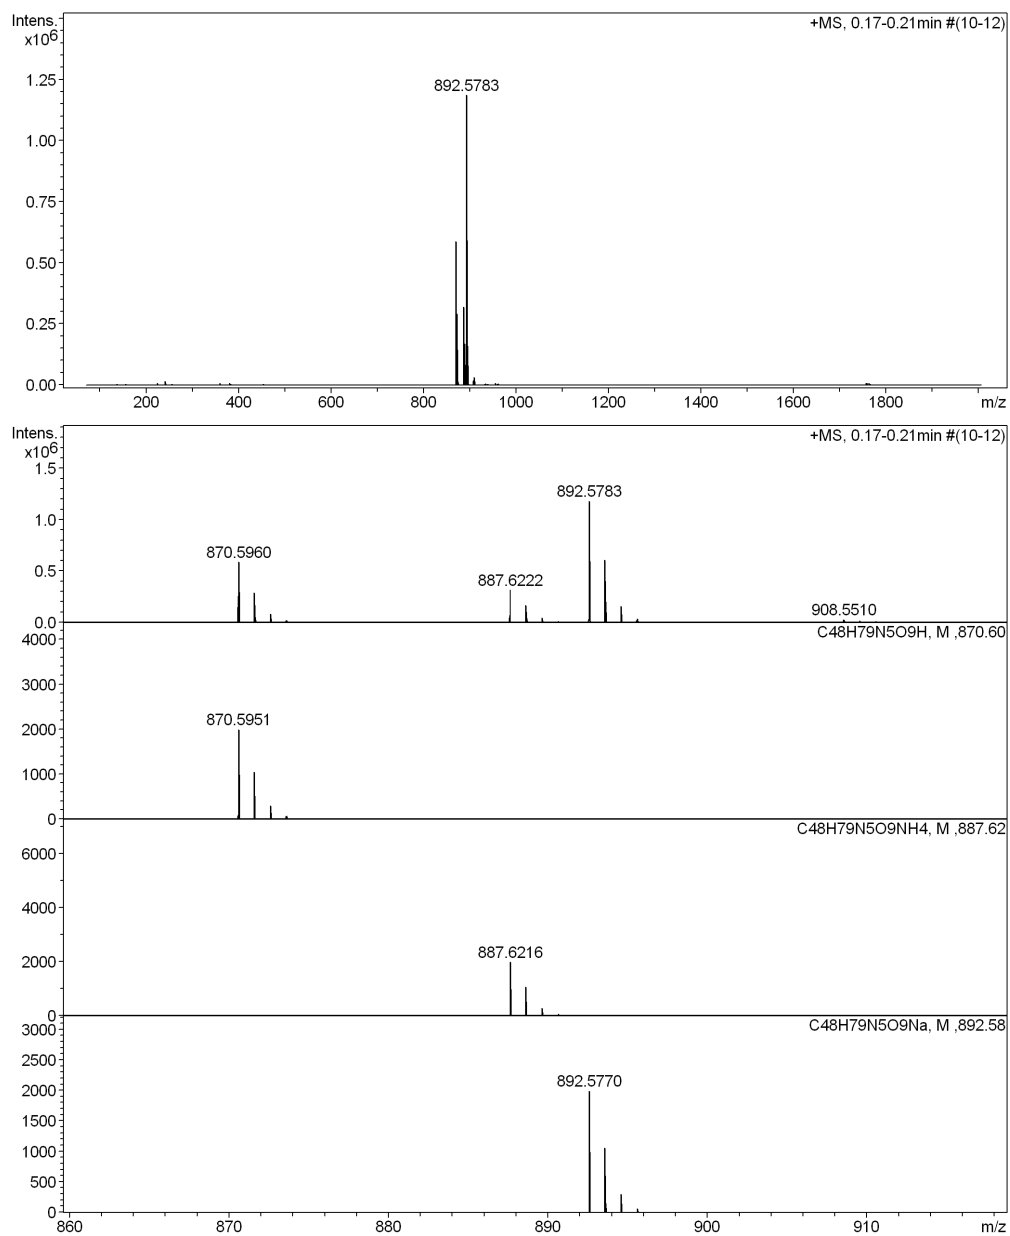

Figure S32: HRMS spectrum of compound **19** (MMAE-TCO) (ESI+).

HRMS  
Cy5.5-nrTCO, **22**  
Exact Mass: 833.53642

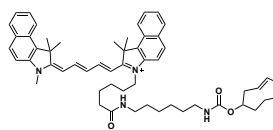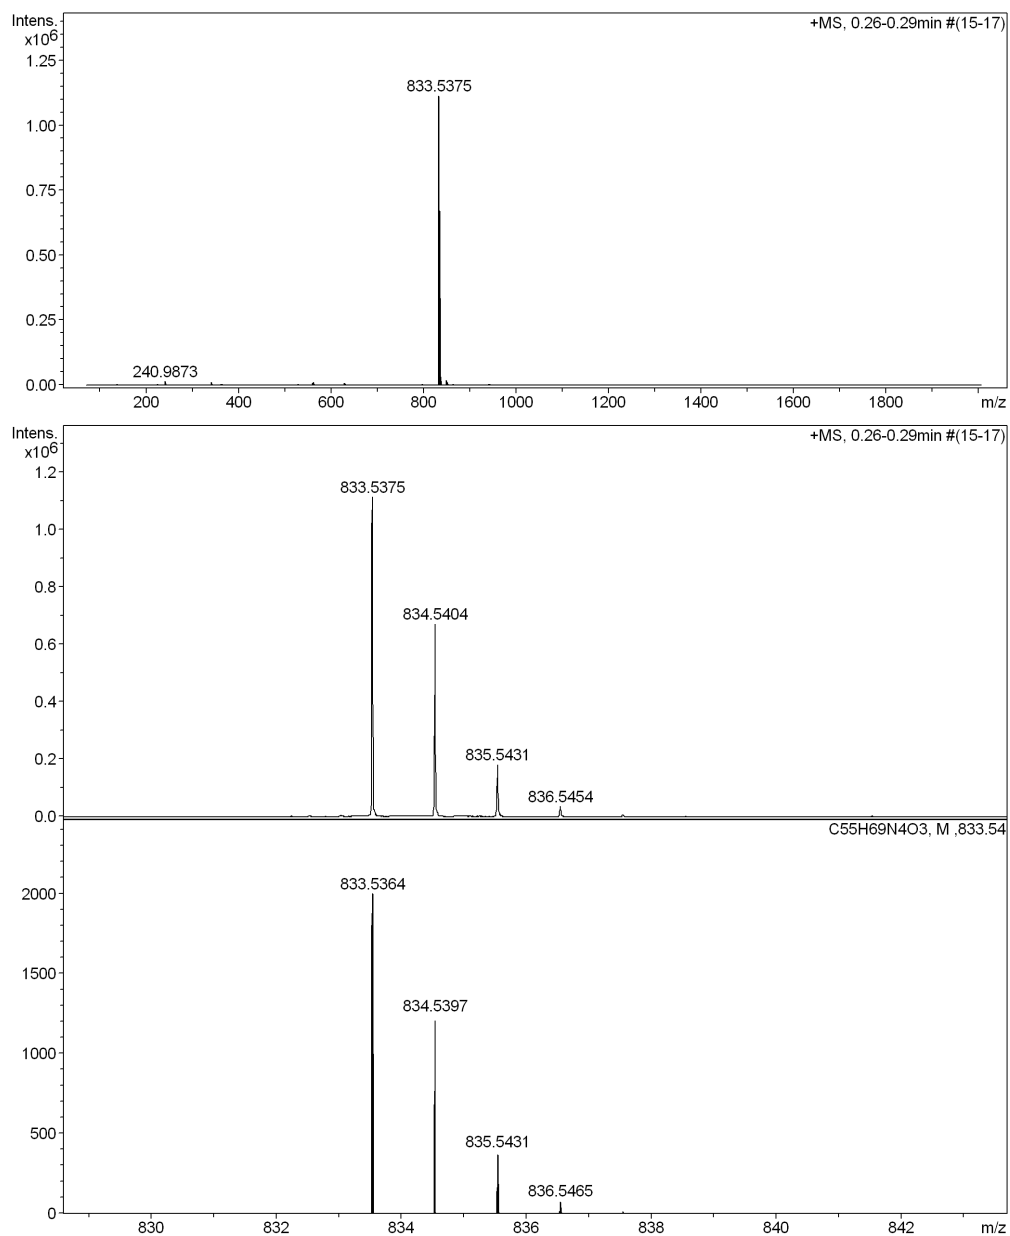

Figure S33: HRMS spectrum of compound **22** (Cy5.5-nrTCO) (ESI+).

# Bibliography

- [1] Jun Yang, Mark R. Karver, Weilong Li, Swagat Sahu, and Neal K. Devaraj. “Metal-Catalyzed One-Pot Synthesis of Tetrazines Directly from Aliphatic Nitriles and Hydrazine.” In: *Angewandte Chemie International Edition* 51.21 (2012), pp. 5222–5225. DOI: 10.1002/anie.201201117.
- [2] Xinyuan Fan, Yun Ge, Feng Lin, Yi Yang, Gong Zhang, William Shu Ching Ngai, Zhi Lin, Siqi Zheng, Jie Wang, Jingyi Zhao, Jie Li, and Peng R. Chen. “Optimized Tetrazine Derivatives for Rapid Bioorthogonal Decaging in Living Cells.” In: *Angewandte Chemie International Edition* 55.45 (2016), pp. 14046–14050. DOI: 10.1002/anie.201608009.
- [3] Ron M. Versteegen, Raffaella Rossin, Wolter ten Hoeve, Henk M. Janssen, and Marc S. Robillard. “Click to Release: Instantaneous Doxorubicin Elimination upon Tetrazine Ligation.” In: *Angewandte Chemie International Edition* 52.52 (2013), pp. 14112–14116. DOI: 10.1002/anie.201305969.
- [4] Samer Gnaim, Anna Scomparin, Sayantan Das, Rachel Blau, Ronit Satchi-Fainaro, and Doron Shabat. “Direct Real-Time Monitoring of Prodrug Activation by Chemiluminescence.” In: *Angewandte Chemie* 130.29 (2018), pp. 9171–9175. DOI: 10.1002/ange.201804816.
- [5] Christian Ritz, Florent Baty, Jens C. Streibig, and Daniel Gerhard. “Dose-Response Analysis Using R.” In: *PLoS ONE* 10.12 (2015), e0146021. DOI: 10.1371/journal.pone.0146021. (R package version 3.0.1).
- [6] R Core Team. *R: A Language and Environment for Statistical Computing*. R Foundation for Statistical Computing. Vienna, Austria, 2024. URL: <https://www.R-project.org/>. (R version 4.4.2).
- [7] Hadley Wickham, Mara Averick, Jennifer Bryan, Winston Chang, Lucy McGowan, Romain François, Garrett Grolmund, Alex Hayes, Lionel Henry, Jim Hester, Max Kuhn, Thomas Pedersen, Evan Miller, Stephan Bache, Kirill Müller, Jeroen Ooms, David Robinson, Dana Seidel, Vitalie Spinu, Kohske Takahashi, Davis Vaughan, Claus Wilke, Kara Woo, and Hiroaki Yutani. “Welcome to the Tidyverse.” In: *Journal of Open Source Software* 4.43 (2019), p. 1686. DOI: 10.21105/joss.01686. (R package version 2.0.2).
- [8] Hadley Wickham. “ggplot2, Elegant Graphics for Data Analysis.” In: *Use R!* (2016). DOI: 10.1007/978-3-319-24277-4. (R package version 3.5.1).
- [9] Claus O. Wilke. *cowplot: Streamlined Plot Theme and Plot Annotations for 'ggplot2'*. 2024. URL: <https://wilkelab.org/cowplot/>. (R package version 1.1.3).
- [10] Erik Clarke, Scott Sherrill-Mix, and Charlotte Dawson. *ggbeeswarm: Categorical Scatter (Violin Point) Plots*. 2023. URL: <https://github.com/eclarke/ggbeeswarm>. (R package version 0.7.2).
- [11] Paul Tol. *Colour Schmes, Technical note SRON/EPS/TN/09-002* 3.2. 2021. URL: <https://sronpersonalpages.nl/~pault>.
- [12] Erich Neuwirth. *RColorBrewer: ColorBrewer Palettes*. 2022. URL: <https://CRAN.R-project.org/package=RColorBrewer>. (R package version 1.1.3).
